# Supplementary material for: Economical Evolution: Microbes Reduce the Synthetic Cost of Extracellular Proteins
Source: PubMed Central journal article supplement — mBio. 2010 Aug 24;1(3):e00131-10. doi: 10.1128/mBio.00131-10 (PMC2932507; doi:10.1128/mbio.00131-10), 2010-08-24
Supplement: mBio00131-10-s1.pdf [file mBio00131-10-s1.pdf]

## Text S1: Supplemental Methods and Tables File

### Supplemental Methods

#### Changes to Protein Location Annotations

Protein sequences and predicted cellular locations were from PSORTdb (exceptions *E. coli* – Echobase; *S. glossinidius*, *B. aphidicola* Sg, and *H. cicadicola* Dsem - NCBI). The location of several proteins in PSORTdb were annotated as ‘Unknown’ or given the wrong location altogether. For instance, some known ribosomal proteins were annotated to locations other than the cytoplasm (81). To refine the protein localization data, all known ribosomal proteins were changed to cytoplasmic. We also searched the literature for known extracellular proteins and reannotated their locations, as appropriate, when supported by experimental evidence. Those changes are as follows: CsgA,B and FimH for *S. typhimurium* LT2; MshA,B,O for *C. psychrerythraea* 34H (101); MshA,B,O and CsgA,B for *S. oneidensis* MR-1; CiaB for *W. succinogenes* DSM 1740 (9); AcuG, ComC, and ComP for *Acinetobacter* sp. ADP1 (BD413) (30, 51, 78); AprX and PopB for *P. aeruginosa* PAO1 (25, 35); TcpA, HylA (5), MshA,B (101), Hcp, and VgrG (16) for *V. cholera* El Tor; and HfaA for *C. crescentus* CB15 (99) were all changed to extracellular. In Gram-negative bacteria, PilA, FlgD,E,K,L (55), FlgM (40), FliK (61), and flagellins were changed to extracellular. For *F. johnsoniae* UW101, SprB (44) and homologs of the curli subunits CsgA,B were changed to extracellular. For *C. hutchinsonii* ATCC 33406, SprB was identified by blasting with FjoH\_0979 of *F. johnsoniae* UW101. CHU\_2225 (Uniprot Q11SX6\_CYTH3) was identified as a SprB homolog (E value of 1e-104) and was changed to extracellular.

#### Electron Microscopy

For flagella, Type 1 pili, and curli TEMs, BW25113 was grown to late log in Lysogeny Broth (LB: 10g Tryptone, 5g Yeast extract, 10g NaCl per liter) shaking at 250 rpm, stationary in LB at 37°C for 16 h, or on YESCA plates (10g Casamino acids, 1g Yeast extract, 20g Agar per liter) for 48h at 26°C

respectively. All samples were resuspended in PBS, incubated with formvar-coated copper grids (Ernest F Fullam, Inc), briefly washed with H<sub>2</sub>O, and stained 2 minutes in 2% uranyl acetate. Grids were viewed using a Phillips CM10 microscope.

### Calculating Percent Savings for a Specific Amino Acid Bias in a Given Protein

Total ATPs saved in a protein:

$$\text{Protein chain length} \times (\text{Organism's mean Average Synthetic Cost} - \text{Protein Average Synthetic Cost})$$

ATPs saved per amino acid:

$$(\text{Number of a specific amino acid in a protein} - (\text{Organism's mean \% of specific amino acid} \times \text{Protein chain length})) \times (\text{Average cost of all amino acids} - \text{Cost of a specific amino acid})$$

Percent Savings of a specific amino acid:

$$(\text{ATPs saved per amino acid} / \text{Total ATPs saved}) \times 100$$

### Type III Effectors

Type III effectors were culled from a recent survey of plant and animal pathogens (7) and are listed in Table S18B (Tab E in Data Set S1). For *P. syringae* pv. *tomato* str. DC3000 Type III effectors (also called Hops – Hrp outer protein) we used the Hop database, the T3SS helper database, and the Discontinued Hops database at the “*P. syringae* Hop Identification and Nomenclature Home Page” ([http://pseudomonas-syringae.org/pst\\_func\\_gen2.htm](http://pseudomonas-syringae.org/pst_func_gen2.htm)). We included the following proteins: PSPTO\_4101 (*hopAK1*), PSPTO\_1022 (*hopAM1-1*), and PSPTO\_5061 (*hopAN1*) which have plant phenotypes (31, 43, 86); PSPTO\_1378 (*hrpH*) which was shown to be a T3SS substrate (75), and PSPTO\_3292,3293,0907 which are translocated into plant cells (86). Confirmed Hop proteins were considered to be extracellular in later analysis. Only one copy of Hcp (*P. aeruginosa* PAO1) and HopAM1 (*P. syringae* *tomato*) were used in data analysis. See Table S18A in Data Set S1, Tab D for a

complete table of *P. syringae* Hops and Hop helpers. Fig. 4A, S6, and Table S19 compare the ASC of Type III effectors to other cellular proteins.

## **Serine Proteases**

Extracellular serine proteases were those annotated as “secreted” in Uniprot (<http://www.uniprot.org>). Cellular serine proteases were serine proteases not annotated as “secreted.” 5,784 bacterial serine proteases were downloaded from Uniprot using the keywords ”taxonomy:2 keyword:720” on August 18, 2009. Bacterial extracellular serine proteases (191 total) were downloaded using “taxonomy:2 keyword:720 keyword:964”. Taxonomy 2 = “Bacteria”; keyword 720 = “Serine protease”; and keyword 964 = “Secreted”.

## **Autotransporters**

The autotransporters used were those described in Table 1 of Henderson et al 2004 (38). Uniprot (<http://www.uniprot.org>) was used to select autotransporters which had defined secreted  $\alpha$ -domains. The ASC of both the  $\alpha$ -domain and their respective  $\beta$ -domains were calculated using the cost values for chemoheterotrophic bacteria (2, 36).

## **Graphing of Protein Average Synthetic Cost (ASC)**

To vertically spread the cost data within a location, protein length was used. The value  $0.2 \times \text{LOG}_{10}(\text{Length})$  was added to a specific integer of each location. For example cytoplasmic proteins were  $1 + 0.2 \times \text{LOG}_{10}(\text{Length})$ , and inner membranes were  $2 + 0.2 \times \text{LOG}_{10}(\text{Length})$ . These numbers were graphed vs. proteins costs to generate the graphs in Fig. 1A, 3B, 4, S1, S2, S5, S6.

## **Protein Abundance Values**

Abundance values from Masuda et al (57) and Ishihama et al (42). Protein sequences and location were from Echobase; abundance values were merged with Echobase data using GenProtEC ECK and Uniprot numbers respectively.

## **Prediction of Secondary Structure and Intrinsic Disorder**

The secondary structure of cytoplasmic, periplasmic, and extracellular proteins from *E. coli* K-12 and *P. syringae* were predicted using PSIPRED version 2.61 (58). Intrinsically disordered regions were predicted with DISOPRED2 version 2.4 (107) using a 2% false positive rate. Both programs were downloaded from (<http://bioinfadmin.cs.ucl.ac.uk/downloads/>).

## **Comparison of Amino Acid Composition of Flagellar Subunits**

Extracellular assembly or structural components of *E. coli* flagella were individually blasted against 216 *Gammaproteobacteria*. Many flagella genes have similar regions, so sequences with E values below  $10^{-10}$  were removed except for FlgG ( $<10^{-20}$ ) and FliK ( $<10^{-5}$ ) which have high identity to FlgG (52) and low ortholog identity respectively (108). Sequences whose lengths were 50% (+/-) their respective *E. coli* counterpart were removed. The remaining homologs were used in our analysis.

**Table S1: Synthetic cost of amino acids.**

|                           |     |   | Gibbs Free Energy ( $\Delta G_r$ ) |      |           |         |           |                                |                               | Bacteria       |              |                  |             |              | Yeast       |              |       |
|---------------------------|-----|---|------------------------------------|------|-----------|---------|-----------|--------------------------------|-------------------------------|----------------|--------------|------------------|-------------|--------------|-------------|--------------|-------|
|                           |     |   | Codons                             |      | Molecular |         |           | Hydrothermal                   | Seawater                      | Chemoheterophs |              | Photoautotrophs* | Li et al*   | Craig&Weber* | Respiratory | Fermentative |       |
|                           |     |   | #                                  | %GC  | Mass      | Carbons | Nitrogens | ( $\text{kJ mol}^{-1}$ ) 100°C | ( $\text{kJ mol}^{-1}$ ) 18°C | Cost (~P)      | Savings (~P) | Cost (~P)        | Cost (~P)   | Cost (ATPs)  | Cost (~P)   | Cost (~P)    |       |
| Enzymes in <i>E. coli</i> |     |   |                                    |      |           |         |           |                                |                               |                |              |                  |             |              |             |              |       |
| Alanine                   | Ala | A | 1                                  | 4    | 83.33     | 71.079  | 3         | 1                              | -12.12                        | 113.66         | 11.7         | 15.66            | 11.7        | 11.7         | 12.5        | 14.5         | 2     |
| Arginine                  | Arg | R | 10                                 | 6    | 72.22     | 156.188 | 6         | 4                              | 197.52                        | 409.46         | 27.3         | 0.06             | 27.3        | <b>38.3</b>  | 18.5        | 20.5         | 13    |
| Asparagine                | Asn | N | 1                                  | 2    | 16.67     | 114.104 | 4         | 2                              | 83.53                         | 201.56         | 14.7         | 12.66            | 14.7        | <b>12.7</b>  | 4           | 18.5         | 6     |
| Aspartic Acid             | Asp | D | 1                                  | 2    | 50.00     | 115.089 | 4         | 1                              | 32.78                         | 146.74         | 12.7         | 14.66            | 12.7        | <b>14.7</b>  | 1           | 15.5         | 3     |
| Cysteine                  | Cys | C | 9                                  | 2    | 50.00     | 103.145 | 3         | 1                              | 60.24                         | 224.67         | 24.7         | 2.66             | 24.7        | 24.7         | 24.5        | 26.5         | 13    |
| Glutamic Acid             | Glu | E | 1                                  | 2    | 50.00     | 129.116 | 5         | 1                              | -1.43                         | 172.13         | 15.3         | 12.06            | 15.3        | <b>34.3</b>  | 8.5         | 9.5          | 2     |
| Glutamine                 | Gln | Q | 2                                  | 2    | 50.00     | 128.131 | 5         | 2                              | 44.03                         | 223.36         | 16.3         | 11.06            | 16.3        | <b>15.3</b>  | 9.5         | 10.5         | 3     |
| Glycine                   | Gly | G | 4                                  | 4    | 83.33     | 57.052  | 2         | 1                              | 14.89                         | 80.49          | 11.7         | 15.66            | 11.7        | 11.7         | 14.5        | 14.5         | 1     |
| Histidine                 | His | H | 1                                  | 2    | 50.00     | 137.141 | 5         | 3                              | 154.48                        | 350.52         | 38.3         | -10.94           | <b>40.3</b> | <b>32.3</b>  | 33          | 29           | 5     |
| Isoleucine                | Ile | I | 11                                 | 3    | 11.11     | 113.16  | 6         | 1                              | -96.4                         | 213.93         | 32.3         | -4.94            | 32.3        | <b>30.3</b>  | 20          | 38           | 14    |
| Leucine                   | Leu | L | 7                                  | 6    | 38.89     | 113.16  | 6         | 1                              | -105.53                       | 205.03         | 27.3         | 0.06             | 27.3        | 27.3         | 33          | 37           | 4     |
| Lysine                    | Lys | K | 10                                 | 2    | 16.67     | 128.17  | 6         | 2                              | -28.33                        | 258.56         | 30.3         | -2.94            | 30.3        | <b>27.3</b>  | 18.5        | 36           | 12    |
| Methionine                | Met | M | 9                                  | 1    | 33.33     | 131.199 | 5         | 1                              | -174.71                       | 113.22         | 34.3         | -6.94            | 34.3        | <b>20.3</b>  | 18.5        | 36.5         | 24    |
| Phenylalanine             | Phe | F | 9                                  | 2    | 16.67     | 147.177 | 9         | 1                              | -114.54                       | 303.64         | 52           | -24.64           | <b>54</b>   | 52           | 63          | 61           | 10    |
| Proline                   | Pro | P | 4                                  | 4    | 83.33     | 97.117  | 5         | 1                              | -38.75                        | 192.83         | 20.3         | 7.06             | 20.3        | <b>16.3</b>  | 12.5        | 14.5         | 7     |
| Serine                    | Ser | S | 3                                  | 6    | 50.00     | 87.078  | 3         | 1                              | 69.47                         | 173.73         | 11.7         | 15.66            | 11.7        | 11.7         | 15          | 14.5         | 1     |
| Threonine                 | Thr | T | 6                                  | 4    | 50.00     | 101.105 | 4         | 1                              | 53.51                         | 216.5          | 18.7         | 8.66             | 18.7        | 18.7         | 6           | 21.5         | 9     |
| Tryptophan                | Trp | W | 12                                 | 1    | 66.67     | 186.213 | 11        | 2                              | -38.99                        | 431.17         | 74.3         | -46.94           | <b>76.3</b> | 74.3         | 78.5        | 75.5         | 14    |
| Tyrosine                  | Tyr | Y | 9                                  | 2    | 16.67     | 163.176 | 9         | 1                              | -59.53                        | 334.2          | 50           | -22.64           | <b>52</b>   | 50           | 56.5        | 59           | 8     |
| Valine                    | Val | V | 4                                  | 4    | 50.00     | 99.133  | 5         | 1                              | -70.12                        | 178            | 23.3         | 4.06             | 23.3        | 23.3         | 25          | 29           | 4     |
| Source                    |     |   | (21)                               |      |           |         |           |                                | (6)                           | (6)            | (2, 36)      |                  | (36)        | (50)         | (21)        | (105)        | (105) |
| Average aa                |     |   | 5.7                                | 3.05 |           | 118.887 | 5.3       | 1.45                           | -1.5                          | 227.17         | 27.36        |                  | 27.76       | 27.36        | 23.625      | 29.075       | 7.75  |

\* Numbers in **BOLD** differ from chemoheterotrophic bacteria.

**Notes:** Values in Akashi and Gojobori 2002 (2) are based on the average of overall synthetic cost under growth on three substrates: glucose, acetate, and malate. Cost varied slightly with different carbon sources but were highly correlated (glucose vs acetate  $r^2=0.968$ , glucose vs malate  $r^2=0.998$ )(2). Bragg and Wagner(17) use 16 ~P (respiratory) and 1 ~P (fermentative) for Lys instead of 36 ~P and 12~P from Wagner(105); Lys production in yeast uses  $\alpha$ -ketoglutarate instead of oxaloacetate(17). Average cost (equal amino acids) for respiratory and fermentative growth using these numbers would be 28.075 and 7.2 respectively.

Li et al 2009 (50) has the same values for eukaryotes as Wagner(105) and sources Heizer et al(36) values for prokaryotes. However the values listed in their supplementary section do not match with Heizer et al(36): Arg is listed at 38.3 not 27.3, Asp and Asn values were inverted, Glu is listed 34.3 not 15.3, Gln is listed 15.3 not 16.3, His is listed 32.3 not 38.3, Ile is listed 30.3 not 32.3, Lys is listed 27.3 not 30.3, Met is listed 20.3 not 34.3, and Pro is listed 16.3 not 20.3. No explanation was given in the manuscript as to why the alternative values were used (50).

**Table S2: Correlation between different amino acid synthetic costs.**

|                                       | Spearman |           | Kendall |          | Gamma   | Linear Correlation (Pearson) |          |
|---------------------------------------|----------|-----------|---------|----------|---------|------------------------------|----------|
|                                       | R        | p value   | Tau     | p value  |         | R                            | p value  |
| <b>vs Chemoheterotrophic</b>          |          |           |         |          |         |                              |          |
| Number of Enzymes <i>E. coli</i>      | 0.6974   | 6.31E-04  | 0.5736  | 4.06E-04 | 0.6145  | 0.6920                       | 7.24E-04 |
| Number of Codons                      | -0.4565  | 0.0431    | -0.3427 | 0.0346   | -0.4058 | -0.4309                      | 0.0579   |
| Number of Carbons                     | 0.8429   | 3.08E-06  | 0.7176  | 9.71E-06 | 0.7875  | 0.9125                       | 2.07E-08 |
| Number of Nitrogens                   | 0.2536   | 0.2806    | 0.1930  | 0.2341   | 0.2826  | 0.1871                       | 0.4295   |
| Average Codon %GC                     | -0.4438  | 0.0500    | -0.3536 | 0.0293   | -0.4000 | -0.2855                      | 0.2223   |
| Average Codon %GC Weighted*           | -0.4211  | 0.0645    | -0.2979 | 0.0663   | -0.3011 | -0.3026                      | 0.1947   |
| Molecular Mass                        | 0.7502   | 1.39E-04  | 0.6027  | 2.03E-04 | 0.6108  | 0.8030                       | 2.02E-05 |
| Surface Seawater ΔG(kJ mol-1) 18°C    | 0.7149   | 3.97E-04  | 0.5639  | 5.09E-04 | 0.5699  | 0.7480                       | 1.49E-04 |
| Hydrothermal Sol. ΔG (kJ mol-1) 100°C | -0.4588  | 0.0419    | -0.2979 | 0.0663   | -0.3011 | -0.3260                      | 0.1607   |
| Photoautotrophic                      |          | <0.000001 |         |          |         | 0.9996                       | 0, t=156 |
| Yeast respiratory                     | 0.8737   | 4.87E-07  | 0.7147  | 1.05E-05 | 0.7363  | 0.9540                       | 7.37E-11 |
| Yeast fermentative                    | 0.7724   | 6.59E-05  | 0.6183  | 1.38E-04 | 0.6354  | 0.5414                       | 0.0137   |
| Yeast respiratory Bragg               | 0.8427   | 3.12E-06  | 0.6720  | 3.43E-05 | 0.6923  | 0.9360                       | 1.35E-09 |
| Yeast fermentative Bragg              | 0.6788   | 0.0010    | 0.5460  | 7.64E-04 | 0.5642  | 0.5155                       | 0.0200   |
| Li et al Prokaryotic                  | 0.8615   | 1.06E-06  | 0.7566  | 3.10E-06 | 0.7730  | 0.9256                       | 5.08E-09 |
| Craig&Weber <i>E. coli</i>            | 0.8090   | 1.57E-05  | 0.6307  | 1.01E-04 | 0.6464  | 0.9337                       | 1.84E-09 |
| <b>vs Yeast respiratory</b>           |          |           |         |          |         |                              |          |
| Number of Enzymes <i>E. coli</i>      | 0.7223   | 3.23E-04  | 0.5525  | 6.60E-04 | 0.5976  | 0.7328                       | 2.38E-04 |
| Number of Codons                      | -0.3207  | 0.1680    | -0.2575 | 0.1124   | -0.3088 | -0.3748                      | 0.1035   |
| Number of Carbons                     | 0.7103   | 4.49E-04  | 0.5913  | 2.67E-04 | 0.6561  | 0.8809                       | 2.96E-07 |
| Number of Nitrogens                   | 0.0417   | 0.8616    | 0.0292  | 0.8569   | 0.0435  | -0.0059                      | 0.9805   |
| Average Codon %GC                     | -0.5558  | 0.0109    | -0.4436 | 0.0063   | -0.5067 | -0.4183                      | 0.0664   |
| Molecular Mass                        | 0.5272   | 0.0169    | 0.3871  | 0.0170   | 0.3956  | 0.6895                       | 7.71E-04 |
| Surface Seawater ΔG(kJ mol-1) 18°C    | 0.5459   | 0.0128    | 0.4129  | 0.0109   | 0.4208  | 0.6131                       | 0.0040   |
| Hydrothermal Sol. ΔG (kJ mol-1) 100°C | -0.5595  | 0.0103    | -0.3164 | 0.0511   | -0.3224 | -0.4797                      | 0.0323   |
| Photoautotrophic                      | 0.8737   | 4.87E-07  | 0.7147  | 1.05E-05 | 0.7363  | 0.9523                       | 1.02E-10 |
| Yeast fermentative                    | 0.7106   | 4.46E-04  | 0.5203  | 0.0013   | 0.5393  | 0.5140                       | 0.0204   |
| Yeast respiratory Bragg               | 0.9682   | 2.85E-12  | 0.9000  | 2.89E-08 | 0.9344  | 0.9702                       | 1.56E-12 |
| Yeast fermentative Bragg              | 0.6167   | 0.0038    | 0.4469  | 0.0059   | 0.4659  | 0.4693                       | 0.0368   |
| Li et al Prokaryotic                  | 0.6778   | 1.02E-03  | 0.5547  | 6.28E-04 | 0.5714  | 0.8590                       | 1.24E-06 |
| Craig&Weber <i>E. coli</i>            | 0.8063   | 1.76E-05  | 0.6541  | 5.53E-05 | 0.6760  | 0.9286                       | 3.54E-09 |
| <b>vs Molecular Mass</b>              |          |           |         |          |         |                              |          |
| Number of Enzymes <i>E. coli</i>      | 0.3811   | 0.0973    | 0.3068  | 0.0586   | 0.3254  | 0.5097                       | 0.0217   |
| Number of Codons                      | -0.6168  | 0.0038    | -0.5225 | 0.0013   | -0.6115 | -0.4507                      | 0.0461   |
| Number of Carbons                     | 0.7633   | 9.03E-05  | 0.6364  | 8.74E-05 | 0.6914  | 0.8669                       | 7.59E-07 |
| Number of Nitrogens                   | 0.5111   | 0.0213    | 0.4265  | 0.0086   | 0.6129  | 0.4740                       | 0.0347   |
| Average Codon %GC                     | -0.3603  | 0.1187    | -0.2823 | 0.0819   | -0.3158 | -0.3606                      | 0.1184   |
| Average Codon %GC Weighted*           | -0.4438  | 0.0500    | -0.3325 | 0.0404   | -0.3333 | -0.3769                      | 0.1014   |
| Surface Seawater ΔG(kJ mol-1) 18°C    | 0.6702   | 0.0012    | 0.5330  | 0.0010   | 0.5344  | 0.8352                       | 4.60E-06 |
| Hydrothermal Sol. ΔG (kJ mol-1) 100°C | -0.1121  | 0.6381    | -0.0792 | 0.6256   | -0.0794 | -0.0357                      | 0.8813   |
| Photoautotrophic                      | 0.7502   | 1.39E-04  | 0.6027  | 2.03E-04 | 0.6108  | 0.8024                       | 2.08E-05 |
| Yeast fermentative                    | 0.5300   | 0.0162    | 0.3807  | 0.0189   | 0.3880  | 0.4854                       | 0.0300   |
| Yeast respiratory Bragg               | 0.5030   | 0.0238    | 0.3656  | 0.0242   | 0.3736  | 0.6667                       | 0.0013   |
| Yeast fermentative Bragg              | 0.4664   | 0.0382    | 0.3289  | 0.0426   | 0.3370  | 0.4488                       | 0.0472   |
| Li et al Prokaryotic                  | 0.8060   | 1.79E-05  | 0.6774  | 2.97E-05 | 0.6865  | 0.8434                       | 3.00E-06 |
| Craig&Weber <i>E. coli</i>            | 0.4414   | 0.0514    | 0.3102  | 0.0559   | 0.3152  | 0.6568                       | 0.0017   |
| <b>vs Average Codon %GC</b>           |          |           |         |          |         |                              |          |
| Number of Enzymes <i>E. coli</i>      | -0.2779  | 0.2355    | -0.2526 | 0.1195   | -0.3043 | -0.3195                      | 0.1698   |
| Number of Codons                      | 0.3559   | 0.1236    | 0.2104  | 0.1947   | 0.2846  | 0.3803                       | 0.0981   |
| Average Codon %GC Weighted*           | 0.9375   | 1.11E-09  | 0.8504  | 1.58E-07 | 0.9477  | 0.9840                       | 6.18E-15 |
| Number of Carbons                     | -0.4215  | 0.0642    | -0.3365 | 0.0381   | -0.4179 | -0.3484                      | 0.1323   |
| Number of Nitrogens                   | 0.0489   | 0.8377    | 0.0429  | 0.7914   | 0.0789  | 0.1211                       | 0.6111   |
| <b>vs Number of Codons</b>            |          |           |         |          |         |                              |          |
| Number of Enzymes <i>E. coli</i>      | -0.1029  | .6660     | -0.0601 | 0.7109   | -0.0758 | -0.0982                      | 0.6805   |

\* Based on codon bias of W3110: <http://www.kazusa.or.jp/codon/>

**Table S4: Localization of proteins with extreme average amino acid costs in *E. coli*.**

|                      | <b>Overall<br/>Number</b> | <b>Overall<br/>Percent</b> | <b>Top<br/>100</b> | <b>Top<br/>200</b> | <b>Top<br/>300</b> | <b>Bottom<br/>100</b> | <b>Bottom<br/>200</b> | <b>Bottom<br/>300</b> | <b>Increase<br/>fold Top<br/>100</b> | <b>Increase<br/>fold Bottom<br/>100</b> |
|----------------------|---------------------------|----------------------------|--------------------|--------------------|--------------------|-----------------------|-----------------------|-----------------------|--------------------------------------|-----------------------------------------|
| <b>Cytoplasmic</b>   | 2859                      | 65.9589                    | 36                 | 95                 | 167                | 19                    | 38                    | 68                    | 0.546                                | 0.288                                   |
| <b>IM</b>            | 972                       | 22.4324                    | 12                 | 34                 | 43                 | 78                    | 156                   | 223                   | 0.535                                | 3.477                                   |
| <b>Periplasmic</b>   | 337                       | 7.8006                     | 24                 | 37                 | 50                 | 2                     | 3                     | 4                     | 3.077                                | 0.256                                   |
| <b>OM</b>            | 149                       | 3.43872                    | 17                 | 22                 | 28                 | 1                     | 3                     | 5                     | 4.944                                | 0.291                                   |
| <b>Extracellular</b> | 16                        | 0.36925                    | 11                 | 12                 | 12                 | 0                     | 0                     | 0                     | 29.789                               | 0                                       |
| <b>Total</b>         | 4333                      |                            | 100                | 200                | 300                | 100                   | 200                   | 300                   |                                      |                                         |

**Table S5A: Statistics comparing ASCs of proteins in different locations of *E. coli*.**

|                      | Mann Whitney U |           | Kolmogorov–Smirnov |           |
|----------------------|----------------|-----------|--------------------|-----------|
|                      | Z              | p value   | Max Dif            | p value   |
| <b>vs Cytoplasm</b>  |                |           |                    |           |
| <b>IM</b>            | 23.196         | 4.98E-119 | -0.418             | 9.82E-112 |
| <b>Periplasm</b>     | 6.029          | 1.65E-09  | 0.156              | 6.71E-07  |
| <b>OM</b>            | 3.713          | 2.05E-04  | 0.144              | 4.82E-03  |
| <b>Extracellular</b> | 5.983          | 2.19E-09  | 0.674              | 3.57E-07  |
| <b>vs All</b>        |                |           |                    |           |
| <b>Cytoplasm</b>     | 6.223          | 4.89E-10  | 0.084              | 5.46E-11  |
| <b>IM</b>            | 19.529         | 6.17E-85  | -0.336             | 5.73E-79  |
| <b>Periplasm</b>     | 8.242          | 1.69E-16  | 0.225              | 2.26E-14  |
| <b>OM</b>            | 5.149          | 2.62E-07  | 0.174              | 2.66E-04  |
| <b>Extracellular</b> | 6.001          | 1.96E-09  | 0.663              | 5.70E-07  |
| <b>vs IM</b>         |                |           |                    |           |
| <b>Periplasm</b>     | 17.023         | 5.56E-65  | 0.549              | 6.61E-67  |
| <b>OM</b>            | 11.598         | 4.21E-31  | 0.489              | 7.70E-28  |
| <b>Extracellular</b> | 6.447          | 1.14E-10  | 0.776              | 2.74E-09  |
| <b>vs OM</b>         |                |           |                    |           |
| <b>Periplasm</b>     | 0.146          | 0.8839    | 0.107              | 0.1803    |
| <b>Extracellular</b> | 4.868          | 1.13E-06  | -0.567             | 8.89E-05  |

|                      | Student <i>t</i> Test* |        |          |          |          |
|----------------------|------------------------|--------|----------|----------|----------|
|                      | T value                | 95% CI | 99.9% CI | Deg Free | p value  |
| <b>vs Cytoplasm</b>  |                        |        |          |          |          |
| <b>IM</b>            | 22.178                 | 1.962  | 3.298    | 1314     | 7.87E-93 |
| <b>Periplasm</b>     | 6.378                  | 1.966  | 3.314    | 414      | 4.79E-10 |
| <b>OM</b>            | 3.818                  | 1.975  | 1.975    | 159      | 1.93E-04 |
| <b>Extracellular</b> | 8.461                  | 2.131  | 4.073    | 15       | 4.29E-07 |

\* Assumes Unequal Variance. Confidence Intervals are 2 tailed  
Mann Whitney U test results used instead of Student *t* test  
Most locations fail normality (even taking Square root of data)



**Table S5B: Statistics comparing ASCs of proteins in different locations of *S. cerevisiae*.**

|                            | <i>vs Cytoplasm</i> | Mann Whitney U |          | Kolmogorov–Smirnov |          |
|----------------------------|---------------------|----------------|----------|--------------------|----------|
|                            |                     | Z              | p value  | Max Dif            | p value  |
| Extracellular              |                     | 3.080          | 0.0021   | -0.271             | 6.09E-04 |
| Cell Wall                  |                     | 5.780          | 7.46E-09 | -0.432             | 9.93E-08 |
| Cytoskeleton               |                     | 5.654          | 1.56E-08 | -0.196             | 7.05E-07 |
| Bud                        |                     | 3.345          | 0.0008   | -0.211             | 4.66E-06 |
| Nucleus                    |                     | 3.609          | 0.0003   | -0.056             | 9.77E-04 |
| PM                         |                     | 9.011          | 2.04E-19 | 0.410              | 1.92E-26 |
| ER                         |                     | 13.623         | 2.94E-42 | 0.311              | 1.33E-39 |
| Golgi                      |                     | 7.736          | 1.02E-14 | 0.281              | 6.95E-11 |
| ER or Golgi Unique**       |                     | 11.700         | 1.28E-31 | 0.338              | 1.08E-29 |
| Integral/Endo Membranes    |                     | 16.560         | 1.35E-61 | 0.648              | 7.49E-61 |
| Cell Periphery             |                     | 2.780          | 0.0054   | 0.216              | 1.07E-08 |
| Trans Vesicles             |                     | 5.295          | 1.19E-07 | 0.241              | 2.21E-07 |
| Mitochondria               |                     | 11.708         | 1.16E-31 | 0.175              | 5.03E-21 |
| Peroxisome                 |                     | 5.031          | 4.88E-07 | 0.378              | 5.19E-07 |
| Endosome                   |                     | 0.857          | 0.3912   | 0.125              | 0.3150   |
| Vacuole                    |                     | 9.486          | 2.41E-21 | 0.329              | 3.85E-25 |
| Microsome                  |                     | 2.113          | 0.0346   | 0.732              | 4.09E-03 |
| Lipid Particles            |                     | 4.712          | 2.45E-06 | 0.504              | 1.15E-06 |
| Punctate Comp.             |                     | 2.261          | 0.0237   | 0.128              | 0.0221   |
| Ambiguous                  |                     | 3.368          | 0.0008   | 0.145              | 1.73E-04 |
| ER or Golgi Only***        |                     | 13.398         | 6.25E-41 | 0.513              | 1.42E-34 |
| Extracellular or Cell Wall |                     | 4.080          | 4.51E-05 | -0.286             | 1.93E-05 |
| Cyto & Nuc*                |                     | 1.127          | 0.2598   | -0.017             | 0.7410   |
| All*                       |                     | 14.862         | 5.85E-50 | 0.159              | 8.70E-45 |
|                            | <i>vs All*</i>      |                |          |                    |          |
| Extracellular              |                     | 4.846          | 1.26E-06 | -0.294             | 0.0001   |
| Cell Wall                  |                     | 6.898          | 5.27E-12 | -0.470             | 3.57E-09 |
| Cytoskeleton               |                     | 9.542          | 1.41E-21 | -0.299             | 4.40E-16 |
| Bud                        |                     | 6.606          | 3.94E-11 | -0.279             | 1.36E-10 |
| Cytoplasm                  |                     | 14.862         | 5.85E-50 | -0.159             | 8.70E-45 |
| Nucleus                    |                     | 16.904         | 4.19E-64 | -0.183             | 6.98E-48 |
| PM                         |                     | 4.390          | 1.13E-05 | 0.255              | 7.21E-11 |
| ER                         |                     | 6.641          | 3.11E-11 | 0.156              | 2.18E-11 |
| Golgi                      |                     | 3.324          | 0.0009   | 0.144              | 0.0030   |
| ER or Golgi Unique**       |                     | 5.950          | 2.68E-09 | 0.182              | 1.82E-09 |
| Integral/Endo Membranes    |                     | 12.337         | 5.71E-35 | 0.493              | 1.66E-36 |
| Cell Periphery             |                     | 1.701          | 0.0889   | -0.126             | 0.0023   |
| Trans Vesicles             |                     | 1.031          | 0.3024   | 0.104              | 0.092486 |
| Mitochondria               |                     | 1.170          | 0.2420   | 0.084              | 4.60E-06 |
| Peroxisome                 |                     | 2.031          | 0.0423   | 0.264              | 0.0011   |
| Endosome                   |                     | 1.529          | 0.1262   | -0.093             | 0.6795   |
| Vacuole                    |                     | 3.988          | 6.66E-05 | 0.181              | 2.84E-08 |
| Microsome                  |                     | 1.059          | 0.2897   | 0.584              | 0.0387   |
| Lipid Particles            |                     | 2.566          | 0.0103   | 0.363              | 0.0011   |
| Punctate Comp.             |                     | 1.559          | 0.1191   | -0.084             | 0.2713   |
| Ambiguous                  |                     | 1.628          | 0.1035   | -0.061             | 0.3430   |
| ER or Golgi Only***        |                     | 9.218          | 3.02E-20 | 0.357              | 1.77E-17 |
| Extracellular or Cell Wall |                     | 6.026          | 1.68E-09 | -0.320             | 8.49E-07 |
| Cyto & Nuc*                |                     | 17.351         | 1.93E-67 | -0.159             | 1.70E-53 |

**Table S5B: Statistics comparing ASCs of proteins in different locations of *S. cerevisiae* (continued).**

| <i>vs Cyto &amp; Nuc*</i>  | Z       | p value  | Max Dif | p value  |
|----------------------------|---------|----------|---------|----------|
| Extracellular              | 2.9331  | 0.0034   | -0.2616 | 0.0010   |
| Cell Wall                  | 5.6425  | 1.68E-08 | -0.4221 | 1.94E-07 |
| Cytoskeleton               | 5.2603  | 1.44E-07 | -0.1812 | 4.79E-06 |
| Bud                        | 3.0696  | 0.0021   | -0.1976 | 2.01E-05 |
| Cytoplasm                  | 1.1269  | 0.2598   | 0.0169  | 0.7412   |
| Nucleus                    | 2.7344  | 0.0062   | -0.0388 | 0.0329   |
| PM                         | 9.2554  | 2.13E-20 | 0.4125  | 4.14E-27 |
| ER                         | 14.2357 | 5.50E-46 | 0.3127  | 9.94E-42 |
| Golgi                      | 8.0091  | 1.16E-15 | 0.2868  | 1.77E-11 |
| ER or Golgi Unique**       | 12.1017 | 1.04E-33 | 0.3390  | 1.57E-30 |
| Integral/Endo Membranes    | 16.7279 | 8.21E-63 | 0.6476  | 1.63E-61 |
| Cell Periphery             | 3.0619  | 0.0022   | 0.2190  | 4.43E-09 |
| Trans Vesicles             | 5.5631  | 2.65E-08 | 0.2486  | 6.98E-08 |
| Mitochondria               | 12.7576 | 2.83E-37 | 0.1906  | 1.99E-26 |
| Peroxisome                 | 5.1641  | 2.42E-07 | 0.3945  | 1.27E-07 |
| Endosome                   | 1.0502  | 0.2936   | 0.1283  | 0.2846   |
| Vacuole                    | 9.8263  | 8.68E-23 | 0.3340  | 2.17E-26 |
| Microsome                  | 2.1375  | 0.0326   | 0.7372  | 0.0037   |
| Lipid Particles            | 4.7690  | 1.85E-06 | 0.5112  | 7.58E-07 |
| Punctate Comp.             | 2.5557  | 0.0106   | 0.1258  | 0.0255   |
| Ambiguous                  | 3.7317  | 0.0002   | 0.1513  | 6.27E-05 |
| ER or Golgi Only***        | 13.5775 | 5.45E-42 | 0.5142  | 4.10E-35 |
| Extracellular or Cell Wall | 3.9124  | 9.14E-05 | -0.2767 | 3.84E-05 |
| All*                       | 17.3513 | 1.93E-67 | 0.1593  | 1.70E-53 |

| <i>vs Cytoplasm</i>        | Student <i>t</i> |        |          | Assumes Unequal Variance. Confidence Intervals are 2 tailed |          |
|----------------------------|------------------|--------|----------|-------------------------------------------------------------|----------|
|                            | T value          | 95% CI | 99.9% CI | Deg Free                                                    | p value  |
| Extracellular              | 3.1178           | 2.0049 | 3.4800   | 54                                                          | 0.0029   |
| Cell Wall                  | 5.7357           | 2.0154 | 3.5258   | 44                                                          | 8.24E-07 |
| Cytoskeleton               | 5.6785           | 1.9700 | 3.3320   | 237                                                         | 3.96E-08 |
| Bud                        | 2.4981           | 1.9750 | 3.3528   | 159                                                         | 0.0135   |
| Nucleus                    | 3.6015           | 1.9605 | 3.2926   | 4592                                                        | 0.0003   |
| PM                         | 7.9820           | 1.9720 | 3.3401   | 199                                                         | 1.12E-13 |
| ER                         | 12.8933          | 1.9636 | 3.3055   | 654                                                         | 4.72E-34 |
| Golgi                      | 7.9141           | 1.9741 | 3.3490   | 169                                                         | 3.13E-13 |
| ER or Golgi Unique**       | 11.3575          | 1.9666 | 3.3178   | 360                                                         | 9.33E-26 |
| Integral/Endo Membranes    | 18.3235          | 1.9728 | 3.3436   | 186                                                         | 1.59E-43 |
| Cell Periphery             | 2.0926           | 1.9702 | 3.3330   | 232                                                         | 0.0375   |
| Trans Vesicles             | 5.1461           | 1.9758 | 3.3561   | 151                                                         | 8.16E-07 |
| Mitochondria               | 12.3166          | 1.9612 | 3.2958   | 1859                                                        | 1.45E-33 |
| Peroxisome                 | 5.4403           | 2.0057 | 3.4838   | 53                                                          | 1.38E-06 |
| Endosome                   | 1.2543           | 2.0017 | 3.4663   | 58                                                          | 0.2148   |
| Vacuole                    | 8.5034           | 1.9675 | 3.3218   | 314                                                         | 7.60E-16 |
| Microsome                  | 2.8618           | 2.7764 | 8.6103   | 4                                                           | 0.0458   |
| Lipid Particles            | 4.9165           | 2.0555 | 3.7066   | 26                                                          | 4.19E-05 |
| Punctate Comp.             | 2.3600           | 1.9762 | 3.3579   | 147                                                         | 0.0196   |
| Ambiguous                  | 3.6335           | 1.9690 | 3.3279   | 263                                                         | 0.0003   |
| ER or Golgi Only***        | 13.7257          | 1.9747 | 3.3516   | 162                                                         | 6.17E-29 |
| Extracellular or Cell Wall | 4.0728           | 1.9939 | 3.4329   | 71                                                          | 0.0001   |
| Cyto & Nuc*                | 1.1471           | 1.9603 | 3.2921   | 6186                                                        | 0.2514   |
| All*                       | 18.9590          | 1.9603 | 3.2918   | 7445                                                        | 2.55E-78 |

\* Duplicates removed or none present

\*\* Duplicates, Cytoplasmic, Nuclear removed

\*\*\* Only ER, Golgi, or both

**Table S5C: Statistics comparing ASC of proteins in different locations in *M tuberculosis*.**

|                                    | Mann Whitney U |          | Kolmogorov–Smirnov |          |
|------------------------------------|----------------|----------|--------------------|----------|
|                                    | Z              | p value  | Max Dif            | p value  |
| <b>vs Cytoplasm</b>                |                |          |                    |          |
| <b>Cytoplasmic Membrane</b>        | 10.7167        | 8.49E-27 | -0.2290            | 6.74E-22 |
| <b>Unknown</b>                     | 8.9557         | 3.37E-19 | 0.1446             | 1.93E-13 |
| <b>Extracellular</b>               | 12.3710        | 3.75E-35 | 0.5584             | 8.58E-37 |
| <b>Cell Wall</b>                   | 2.4495         | 0.0143   | 0.4744             | 0.0365   |
| <b>Extracellular and Cell Wall</b> | 12.5622        | 3.41E-36 | 0.5546             | 3.44E-38 |
| <b>vs All</b>                      |                |          |                    |          |
| <b>Cytoplasm</b>                   | 2.0838         | 0.0372   | -0.0488            | 0.0028   |
| <b>Cytoplasmic Membrane</b>        | 11.7610        | 6.20E-32 | -0.2285            | 3.28E-24 |
| <b>Unknown</b>                     | 7.5395         | 4.72E-14 | 0.1152             | 3.32E-10 |
| <b>Extracellular</b>               | 11.8675        | 1.75E-32 | 0.5126             | 5.74E-32 |
| <b>Cell Wall</b>                   | 2.2392         | 0.0251   | 0.4366             | 0.0670   |
| <b>Extracellular and Cell Wall</b> | 12.0425        | 2.12E-33 | 0.5093             | 2.94E-33 |
| <b>vs Cytoplasmic Membrane</b>     |                |          |                    |          |
| <b>Unknown</b>                     | 14.5359        | 7.18E-48 | 0.3347             | 3.10E-38 |
| <b>Extracellular</b>               | 13.4196        | 4.64E-41 | 0.6219             | 1.81E-39 |
| <b>Cell Wall</b>                   | 2.9964         | 0.0027   | 0.4716             | 0.0397   |
| <b>Extracellular and Cell Wall</b> | 13.6098        | 3.50E-42 | 0.6174             | 1.19E-40 |

|                                    | Student <i>t</i> Test* |        |          |          |          |
|------------------------------------|------------------------|--------|----------|----------|----------|
|                                    | T value                | 95% CI | 99.9% CI | Deg Free | p value  |
| <b>vs Cytoplasm</b>                |                        |        |          |          |          |
| <b>Cytoplasmic Membrane</b>        | 10.5911                | 1.9631 | 3.3035   | 754      | 1.57E-24 |
| <b>Unknown</b>                     | 8.9146                 | 1.9613 | 3.2958   | 1841     | 1.15E-18 |
| <b>Extracellular</b>               | 12.2829                | 1.9768 | 3.3604   | 142      | 4.42E-24 |
| <b>Cell Wall</b>                   | 2.0153                 | 2.3646 | 5.4079   | 7        | 0.0837   |
| <b>Extracellular and Cell Wall</b> | 12.3553                | 1.9759 | 3.3566   | 150      | 1.24E-24 |

\* Assumes Unequal Variance. Confidence Intervals are 2 tailed  
Mann Whitney U test results used in text instead of Student *t* test  
Most locations fail normality

**Table S6: Statistics comparing protein ASCs in different sublocations in *E. coli*.**

|                                             | Mann Whitney U Test |           | Kolmogorov–Smirnov |           |
|---------------------------------------------|---------------------|-----------|--------------------|-----------|
|                                             | Z                   | p value   | Max Dif            | p value   |
| <b>vs Cytoplasm</b>                         |                     |           |                    |           |
| <b>Integral Membrane Protein</b>            | 27.6379             | 3.90E-168 | -0.5100            | 7.80E-140 |
| <b>Membrane anchored</b>                    | 0.6490              | 0.5164    | -0.1178            | 0.0287    |
| <b>Periplasmic w N-term mem anchor</b>      | 0.3666              | 0.7139    | -0.3830            | 0.2696    |
| <b>Inner Membrane Lipoprotein</b>           | 4.1532              | 3.28E-05  | 0.5465             | 0.0002    |
| <b>Membrane associated</b>                  | 1.7771              | 0.0756    | 0.2870             | 0.3271    |
| <b>Membrane Lipoprotein*</b>                | 1.1243              | 0.2609    | 0.2708             | 0.6113    |
| <b>OM <math>\beta</math>-barrel protein</b> | 0.3050              | 0.7604    | -0.1226            | 0.3914    |
| <b>OM Lipoprotein</b>                       | 4.8920              | 9.98E-07  | 0.2395             | 3.51E-05  |
| <b>Cell surface appendage</b>               | 5.6057              | 2.07E-08  | 0.7376             | 1.40E-06  |
| <b>Secreted and released</b>                | 2.2686              | 0.0233    | 0.3138             | 0.7407    |
| <b>Extracellular**</b>                      | 5.9832              | 2.19E-09  | 0.6739             | 3.57E-07  |
| <b>vs All</b>                               |                     |           |                    |           |
| <b>Integral Membrane Protein</b>            | 24.0127             | 2.05E-127 | -0.4287            | 1.32E-106 |
| <b>Membrane anchored</b>                    | 2.1015              | 0.0356    | 0.1275             | 0.0127    |
| <b>Periplasmic w N-term mem anchor</b>      | 0.0509              | 0.9594    | -0.3453            | 0.3899    |
| <b>Inner Membrane Lipoprotein</b>           | 4.2749              | 1.91E-05  | 0.5735             | 9.75E-05  |
| <b>Membrane associated</b>                  | 2.1025              | 0.0355    | 0.3283             | 0.1873    |
| <b>Membrane Lipoprotein*</b>                | 1.3172              | 0.1878    | 0.2730             | 0.6005    |
| <b>OM <math>\beta</math>-barrel protein</b> | 0.7611              | 0.4466    | 0.0973             | 0.6821    |
| <b>OM Lipoprotein</b>                       | 5.8900              | 3.86E-09  | 0.2483             | 1.36E-05  |
| <b>Cell surface appendage</b>               | 5.5665              | 2.60E-08  | 0.7417             | 1.17E-06  |
| <b>Secreted and released</b>                | 2.3687              | 0.0179    | 0.3570             | 0.583488  |
| <b>Extracellular**</b>                      | 6.0012              | 1.96E-09  | 0.6630             | 5.70E-07  |
| <b>vs Integral Membrane Protein</b>         |                     |           |                    |           |
| <b>Membrane anchored</b>                    | 10.8649             | 1.69E-27  | 0.4402             | 5.02E-23  |
| <b>Periplasmic w N-term mem anchor</b>      | 2.6038              | 0.0092    | 0.3674             | 0.3187    |
| <b>Inner Membrane Lipoprotein</b>           | 6.0709              | 1.27E-09  | 0.8172             | 4.64E-09  |
| <b>Membrane associated</b>                  | 4.6997              | 2.61E-06  | 0.7301             | 1.85E-05  |
| <b>Membrane Lipoprotein*</b>                | 2.9816              | 0.0029    | 0.4839             | 0.0514    |
| <b>Periplasmic</b>                          | 20.1056             | 6.59E-90  | 0.6431             | 2.86E-86  |
| <b>OM <math>\beta</math>-barrel protein</b> | 7.3597              | 1.84E-13  | 0.5222             | 1.24E-12  |
| <b>OM Lipoprotein</b>                       | 12.4994             | 5.22E-37  | 0.6116             | 5.52E-29  |
| <b>Cell surface appendage</b>               | 5.9058              | 3.51E-09  | 0.8948             | 2.19E-09  |
| <b>Secreted and released</b>                | 3.2553              | 0.0011    | 0.6689             | 0.0296    |
| <b>Extracellular**</b>                      | 6.7169              | 1.86E-11  | 0.8564             | 3.58E-11  |

**Table S6: Statistics comparing protein ASCs in different sublocations in *E. coli* (continued).**

|                                        | <b>Z</b> | <b>p value</b> | <b>Max Dif</b> | <b>p value</b> |
|----------------------------------------|----------|----------------|----------------|----------------|
| <b>vs OM Lipoprotein</b>               |          |                |                |                |
| <b>Periplasmic</b>                     | 1.5790   | 0.1143         | -0.1245        | 0.1832         |
| <b>Inner Membrane Lipoprotein</b>      | 1.6951   | 0.0901         | 0.3467         | 0.0817         |
| <b>Membrane Lipoprotein*</b>           | 0.1966   | 0.8442         | -0.3125        | 0.4666         |
| <b>vs Periplasmic</b>                  |          |                |                |                |
| <b>Periplasmic w N-term mem anchor</b> | 1.1713   | 0.2415         | -0.4956        | 0.0735         |
| <b>Inner Membrane Lipoprotein</b>      | 2.8413   | 0.0045         | 0.4298         | 0.0092         |
| <b>Membrane Lipoprotein*</b>           | 0.2054   | 0.8372         | -0.2861        | 0.5512         |

| Student <i>t</i> test                       |                | with Unequal Variance. CI 2 tailed |                 |                 |                |
|---------------------------------------------|----------------|------------------------------------|-----------------|-----------------|----------------|
|                                             | <b>T value</b> | <b>95% CI</b>                      | <b>99.9% CI</b> | <b>Deg Free</b> | <b>p value</b> |
| <b>vs Cytoplasm</b>                         |                |                                    |                 |                 |                |
| <b>Integral Membrane Protein</b>            | 28.8969        | 1.9622                             | 3.2996          | 1072            | 3.01E-136      |
| <b>Membrane anchored</b>                    | 0.3593         | 1.9745                             | 3.3508          | 164             | 0.7198         |
| <b>Periplasmic w N-term mem anchor</b>      | 0.3731         | 2.5706                             | 6.8688          | 5               | 0.7244         |
| <b>Inner Membrane Lipoprotein</b>           | 5.6518         | 2.1604                             | 4.2208          | 13              | 7.91E-05       |
| <b>Membrane associated</b>                  | 2.6739         | 2.2622                             | 4.7809          | 9               | 0.0255         |
| <b>Membrane Lipoprotein*</b>                | 0.5475         | 2.4469                             | 5.9588          | 6               | 0.6038         |
| <b>OM <math>\beta</math>-barrel protein</b> | 0.2808         | 2.0057                             | 3.4838          | 53              | 0.7799         |
| <b>OM Lipoprotein</b>                       | 5.2490         | 1.9840                             | 3.3905          | 100             | 8.61E-07       |
| <b>Cell surface appendage</b>               | 9.6144         | 2.2010                             | 4.4370          | 11              | 1.09E-06       |
| <b>Secreted and released</b>                | 2.2569         | 3.1824                             | 12.9240         | 3               | 0.1092         |
| <b>Extracellular**</b>                      | 8.4609         | 2.1315                             | 4.0728          | 15              | 4.29E-07       |
| <b>vs OM Lipoprotein</b>                    |                |                                    |                 |                 |                |
| <b>Periplasmic</b>                          | 1.8387         | 1.9767                             | 3.3599          | 143             | 0.0680         |
| <b>Inner Membrane Lipoprotein</b>           | 2.1090         | 2.0639                             | 3.7454          | 24              | 0.0456         |
| <b>Membrane Lipoprotein*</b>                | 0.6253         | 2.3646                             | 5.4079          | 7               | 0.5516         |
| <b>vs Periplasmic</b>                       |                |                                    |                 |                 |                |
| <b>Periplasmic w N-term mem anchor</b>      | 1.4189         | 2.5706                             | 6.8688          | 5               | 0.2152         |
| <b>Inner Membrane Lipoprotein</b>           | 3.5501         | 2.1315                             | 4.0728          | 15              | 0.0029         |
| <b>Membrane Lipoprotein*</b>                | 0.1825         | 2.4469                             | 5.9588          | 6               | 0.8612         |

\*Difficulty determining which membrane for seven “Membrane Lipoproteins”: VisC, YfbK, YiaF, YifL, YihN, YjbH, and YraM. These proteins were included in “Inner Membrane” for Fig. 1A, 3B, S1,S2, S5, S6, and Tables S3-6.

\*\*Subdivided into “Secreted and released” and “Cell surface appendage”

**Table S7: Amino acid percent of proteins in different compartments of *E. coli*.**

|                                  | Mean ATP per aa | %A           | %R          | %N          | %D          | %C          | %E          | %Q          | %G          | %H          | %I          | %L           | %K          | %M          | %F          | %P          | %S          | %T           | %W          | %Y          | %V   | Total Amino Acids | Number |
|----------------------------------|-----------------|--------------|-------------|-------------|-------------|-------------|-------------|-------------|-------------|-------------|-------------|--------------|-------------|-------------|-------------|-------------|-------------|--------------|-------------|-------------|------|-------------------|--------|
| <b>Overall Mean</b>              | 23.555          | 9.37         | 5.60        | 3.87        | 5.03        | 1.29        | 5.83        | 4.42        | 7.12        | 2.33        | 6.10        | 10.59        | 4.70        | 2.96        | 3.91        | 4.30        | 5.81        | 5.36         | 1.52        | 2.79        | 7.09 | 312.46            | 4333   |
| <b>Overall Median</b>            | 23.398          | 9.23         | 5.45        | 3.68        | 5.15        | 1.08        | 5.90        | 4.24        | 7.06        | 2.17        | 5.87        | 10.37        | 4.27        | 2.78        | 3.62        | 4.24        | 5.61        | 5.18         | 1.32        | 2.61        | 6.99 | 275               | 4333   |
| <b>Overall STDEVP</b>            | 1.5038          | 2.90         | 2.43        | 1.79        | 2.04        | 1.24        | 2.59        | 2.06        | 2.50        | 1.50        | 2.27        | 3.20         | 2.44        | 1.33        | 2.06        | 1.75        | 2.07        | 1.95         | 1.20        | 1.47        | 2.28 | 209.216           | 4333   |
| <b>Extracellular*</b>            | 20.652          | <b>12.11</b> | <u>2.53</u> | <u>6.91</u> | 5.81        | <u>0.57</u> | <b>3.03</b> | <b>6.47</b> | 8.04        | <u>0.70</u> | 4.83        | 8.45         | 4.43        | <b>1.71</b> | <b>2.56</b> | <b>2.74</b> | <u>9.11</u> | <u>9.86</u>  | <u>0.63</u> | 2.42        | 7.09 | 280.438           | 16     |
| <b>OM</b>                        | 22.852          | 9.04         | 4.59        | <b>5.53</b> | 5.66        | 1.14        | <b>4.16</b> | 5.16        | 8.20        | <b>1.44</b> | 4.97        | 8.64         | 4.88        | 2.79        | 3.23        | 4.16        | <b>7.40</b> | <b>6.81</b>  | 1.51        | <b>3.99</b> | 6.69 | 334.946           | 149    |
| <b>Periplasm</b>                 | 22.854          | 10.10        | 4.24        | <b>5.05</b> | 5.75        | 1.07        | 4.69        | 5.10        | 7.02        | <b>1.71</b> | 5.06        | 8.84         | <b>6.15</b> | 2.64        | 3.44        | 4.58        | 6.65        | 6.44         | 1.44        | 3.09        | 6.96 | 309.418           | 337    |
| <b>IM</b>                        | 24.653          | 9.93         | 4.56        | 3.22        | <b>3.29</b> | 0.99        | <b>3.61</b> | 3.54        | 7.80        | <b>1.67</b> | 7.48        | 13.18        | 3.56        | 3.53        | <b>5.32</b> | 4.13        | 6.04        | 5.25         | <b>2.16</b> | 2.72        | 8.04 | 357.546           | 972    |
| <b>Cytoplasm</b>                 | 23.317          | 9.10         | 6.18        | 3.86        | 5.50        | 1.44        | 6.82        | 4.59        | 6.84        | 2.68        | 5.82        | 10.03        | 4.90        | 2.82        | 3.54        | 4.34        | 5.53        | 5.17         | 1.32        | 2.72        | 6.80 | 296.498           | 2859   |
| <b>Sublocations</b>              |                 |              |             |             |             |             |             |             |             |             |             |              |             |             |             |             |             |              |             |             |      |                   |        |
| <b>Cell surface appendage</b>    | 20.474          | <b>12.23</b> | <u>2.21</u> | <u>7.95</u> | 5.26        | <u>0.49</u> | <u>2.28</u> | <b>6.33</b> | <b>9.25</b> | <u>0.68</u> | 4.91        | 8.20         | <b>3.49</b> | <b>1.62</b> | <b>2.72</b> | <b>2.18</b> | <u>9.35</u> | <u>10.50</u> | <u>0.56</u> | 2.67        | 7.11 | 299.167           | 12     |
| <b>Secreted and released</b>     | 21.187          | <b>11.72</b> | <b>3.52</b> | 3.78        | <b>7.44</b> | <b>0.78</b> | 5.27        | <u>6.91</u> | <b>4.41</b> | <u>0.75</u> | 4.61        | 9.19         | <u>7.24</u> | <b>1.98</b> | <b>2.07</b> | 4.43        | <b>8.40</b> | <b>7.93</b>  | <b>0.85</b> | <b>1.69</b> | 7.01 | <b>224.25</b>     | 4      |
| <b>OM Lipoprotein</b>            | 22.564          | 9.58         | 4.63        | 4.78        | 5.07        | 1.58        | <b>4.09</b> | <b>5.61</b> | 7.47        | <b>1.41</b> | 5.20        | 9.26         | 5.30        | 3.26        | <b>2.75</b> | 4.62        | <b>7.33</b> | 6.65         | 1.20        | 3.08        | 7.11 | <b>216.46</b>     | 96     |
| <b>OM β-barrel protein</b>       | 23.374          | 8.05         | 4.52        | <u>6.88</u> | <b>6.72</b> | <u>0.36</u> | <b>4.27</b> | 4.34        | <b>9.52</b> | <b>1.49</b> | <b>4.55</b> | <b>7.53</b>  | 4.12        | <b>1.95</b> | 4.09        | 3.31        | <b>7.53</b> | <b>7.12</b>  | <b>2.08</b> | <u>5.64</u> | 5.94 | <u>549.57</u>     | 53     |
| <b>Integral Membrane Protein</b> | 25.01           | 9.98         | 4.29        | 3.00        | <b>2.84</b> | 0.99        | <b>3.14</b> | <b>3.11</b> | 8.04        | <b>1.64</b> | <b>7.94</b> | <b>13.83</b> | <b>3.11</b> | <b>3.72</b> | <b>5.78</b> | 4.05        | 6.09        | 5.19         | <u>2.31</u> | 2.74        | 8.21 | 369.584           | 777    |
| <b>Membrane anchored</b>         | 23.374          | 9.69         | 5.90        | 3.98        | 4.95        | <b>0.94</b> | 5.45        | 5.09        | 6.77        | 1.79        | 5.88        | 10.79        | 5.23        | 2.82        | 3.56        | 4.28        | 5.81        | 5.49         | 1.67        | 2.52        | 7.39 | 284.576           | 158    |
| <b>Peri. w N-term anchor</b>     | 23.48           | 9.06         | 5.22        | 4.06        | 5.74        | <b>1.83</b> | 6.53        | 5.48        | 7.00        | <b>3.19</b> | 5.23        | 8.29         | <b>6.33</b> | 3.21        | 2.95        | <b>5.78</b> | 5.05        | 4.20         | 1.73        | 3.07        | 6.06 | 271.333           | 6      |
| <b>IM Lipoprotein</b>            | 21.987          | 9.47         | <b>4.04</b> | 4.76        | <b>6.37</b> | <b>0.83</b> | 6.14        | <b>6.03</b> | 7.11        | <b>1.21</b> | <b>4.44</b> | 9.65         | <b>6.61</b> | <b>1.91</b> | <b>2.57</b> | 4.38        | 6.44        | 6.32         | <b>0.79</b> | 3.09        | 7.85 | <u>485.5</u>      | 14     |
| <b>Membrane associated</b>       | 22.708          | 11.10        | 5.65        | 4.17        | 5.03        | 1.02        | 6.13        | 5.22        | 7.08        | 2.19        | 4.92        | 9.79         | 5.17        | 3.25        | <b>2.68</b> | 4.60        | 5.65        | 5.06         | 1.46        | 2.46        | 7.36 | 390.5             | 10     |
| <b>Membrane Lipoprotein</b>      | 22.97           | 9.77         | <b>3.91</b> | 4.62        | 5.27        | <b>0.92</b> | <b>3.66</b> | <u>6.78</u> | 7.54        | <u>1.15</u> | <b>4.29</b> | 10.19        | 5.31        | 2.40        | 4.46        | <b>5.94</b> | 6.24        | 6.28         | 1.27        | 3.35        | 6.64 | <b>439.29</b>     | 7      |
| <b>Cost Savings (ATP)</b>        |                 | 15.66        | 0.06        | 12.66       | 14.66       | 2.66        | 12.06       | 11.06       | 15.66       | -10.9       | -4.94       | 0.06         | -2.94       | -6.94       | -24.6       | 7.06        | 15.66       | 8.66         | -46.9       | -22.6       | 4.06 |                   |        |

**Notes:** **Bold** indicates >25% change in amino acid composition from the overall mean.  
Underlined indicates >50% change in amino acid composition from the overall mean.

Amino acid percents are on a per protein basis. The percent amino acid composition of each protein in that location were averaged; they are unweighted for chain length. See Table S22A for weighted percents (% of all amino acids) of proteins in nonmembrane locations of *E. coli*.

\* We also looked at Extracellular proteins cost removing the SEC signal peptide when present (except FlgD for which a SEC signal is predicted; however, FlgD is secreted by the flagella system(76)). The mean changed to 20.433 ATPs per amino acid.

**Table S8: Percent of amino acids in curli specific genes.**

| Standard Competition Ranking |              |          |              |          |              |         |              |           |              |            |              |            |              |           |
|------------------------------|--------------|----------|--------------|----------|--------------|---------|--------------|-----------|--------------|------------|--------------|------------|--------------|-----------|
|                              | % Gly        | Rank Gly | % Ser        | Rank Ser | %GS          | Rank GS | % Asn        | Rank Asn  | % Gln        | Rank Gln   | %NQ          | Rank NQ    | %GSNQ        | Rank GSNQ |
| Mean                         | 7.12         |          | 5.81         |          | 12.93        |         | 3.87         |           | 4.42         |            | 8.29         |            | 21.22        |           |
| Median                       | 7.06         |          | 5.61         |          | 12.84        |         | 3.68         |           | 4.24         |            | 8.16         |            | 21.01        |           |
| STDEVP                       | 2.50         |          | 2.07         |          | 3.09         |         | 1.79         |           | 2.06         |            | 2.77         |            | 3.84         |           |
| CsgA                         | <b>19.21</b> | 6        | <b>9.27*</b> | 227      | <b>28.48</b> | 6       | <b>10.60</b> | <b>22</b> | 7.28**       | 354        | <b>17.89</b> | <b>18</b>  | <b>46.36</b> | <b>2</b>  |
| CsgB                         | 9.93         | 492      | 8.61         | 361      | <b>18.54</b> | 165     | <b>8.61</b>  | <b>87</b> | <b>9.93</b>  | <b>55</b>  | <b>18.54</b> | <b>12</b>  | <b>37.08</b> | <b>8</b>  |
| CsgC                         | 3.64         | 4028     | <b>14.55</b> | 12       | <b>18.18</b> | 198     | 3.64         | 2218      | <b>10.91</b> | <b>33</b>  | <b>14.55</b> | <b>102</b> | <b>32.73</b> | <b>47</b> |
| CsgD                         | 4.17         | 3884     | 8.33         | 420      | 12.50        | 2377    | <b>8.80</b>  | <b>75</b> | 4.17         | 2214       | 12.96        | 223        | 25.46        | 438       |
| CsgE                         | 4.65         | 3693     | 5.43         | 2358     | 10.08        | 3669    | 4.65         | 1160      | 3.88         | 2483       | 8.53         | 1907       | 18.61        | 3415      |
| CsgF                         | 8.70         | 1077     | 7.97         | 536      | 16.67        | 419     | <b>11.59</b> | <b>13</b> | <b>7.97</b>  | <b>218</b> | <b>19.57</b> | <b>7</b>   | <b>36.23</b> | <b>13</b> |
| CsgG                         | 6.86         | 2323     | 7.22         | 846      | 14.08        | 1405    | 5.78         | 531       | 5.78         | 940        | 11.55        | 460        | 25.63        | 411       |
| >P <sub>95</sub>             | 11.11        |          | 9.33         |          | 18.04        |         | 7.14         |           | 7.97         |            | 13.03        |            | 27.78        |           |
| >P <sub>90</sub>             | 10.11        |          | 8.33         |          | 16.60        |         | 6.06         |           | 7.01         |            | 11.64        |            | 25.49        |           |

\* 94.7th Percentile

\*\* 91.8th Percentile

**Note: Bold** ≥95<sup>th</sup> percentile

### Fractional Ranking

|      | Rank G     | Rank S    | Rank GS   | Rank N     | Rank Q    | Rank NQ   | Rank GSNQ |
|------|------------|-----------|-----------|------------|-----------|-----------|-----------|
| CsgA | 6          | 227       | 6         | 22         | 354       | 18        | 2         |
| CsgB | 492        | 361       | 165       | 87         | 55        | 12        | 8         |
| CsgC | 4029.5(4)  | 12        | 201.5(8)  | 2223(11)   | 34(3)     | 102       | 47        |
| CsgD | 3889.5(12) | 427.5(16) | 2392(31)  | 75.5(2)    | 2224(21)  | 224(3)    | 438       |
| CsgE | 3694.5(4)  | 2359.5(4) | 3669.5(2) | 1168.5(18) | 2484.5(4) | 1909.5(6) | 3417.5(6) |
| CsgF | 1080.5(8)  | 536       | 423.5(10) | 13         | 218       | 7         | 13        |
| CsgG | 2323       | 847(3)    | 1405.5(2) | 531        | 940       | 460       | 411       |

**Note:** Numbers in parenthesis are number of proteins with same % amino acid

**Table S9: Percentiles of flagella, curli, and Type 1 pili proteins.**

|                   |         |         |         |         |         |         |         |         |         |
|-------------------|---------|---------|---------|---------|---------|---------|---------|---------|---------|
| <b>Percentile</b> | 99.9999 | 99.999  | 99.99   | 99.9    | 99      | 95      | 90      | 80      | 70      |
| <b>Avg E</b>      | 18.0171 | 18.0362 | 18.2268 | 18.9156 | 20.4295 | 21.4267 | 21.8936 | 22.4035 | 22.7847 |
| <b>Savings</b>    | 5.5378  | 5.5187  | 5.3281  | 4.6393  | 3.1254  | 2.1282  | 1.6613  | 1.1514  | 0.7703  |

**Flagella**

| Percentile | Avg Cost | Rank | Name | Length | Location                  | Role       | Savings per aa |
|------------|----------|------|------|--------|---------------------------|------------|----------------|
| 99.885     | 19.1548  | 6    | FliC | 498    | Cell surface appendage    | Structural | 4.4001         |
| 99.793     | 19.3949  | 10   | FlgM | 97     | Secreted&released(40, 48) | Regulatory | 4.1601         |
| 99.677     | 19.6541  | 15   | FlgD | 231    | Cell surface appendage    | Assembly   | 3.9008         |
| 99.608     | 19.7397  | 18   | FliK | 375    | Secreted&released(61)     | Assembly   | 3.8152         |
| 99.539     | 19.8705  | 21   | FlgF | 251    | Periplasmic               | Structural | 3.6844         |
| 99.493     | 19.9291  | 23   | FliD | 468    | Cell surface appendage    | Structural | 3.6258         |
| 99.308     | 20.1981  | 31   | FlgI | 365    | Periplasmic               | Structural | 3.3568         |
| 98.985     | 20.4642  | 45   | FlgC | 134    | Periplasmic               | Structural | 3.0907         |
| 98.962     | 20.4713  | 46   | FlgK | 547    | Cell surface appendage    | Structural | 3.0836         |
| 98.846     | 20.5953  | 51   | FlgE | 402    | Cell surface appendage    | Structural | 2.9596         |
| 98.639     | 20.6565  | 60   | FlgG | 260    | Periplasmic               | Structural | 2.8984         |
| 98.5       | 20.6683  | 66   | FliE | 104    | Cytoplasmic *             | Structural | 2.8866         |
| 98.015     | 20.8473  | 87   | FlgL | 317    | Cell surface appendage    | Structural | 2.7076         |
| 97.831     | 20.9435  | 95   | FlgB | 138    | Periplasmic               | Structural | 2.6114         |
| 96.03      | 21.2669  | 173  | FliO | 121    | Membrane anchored         | Export     | 2.2880         |
| 95.868     | 21.2995  | 180  | FliF | 552    | IM Protein                | Structural | 2.2555         |
| 95.476     | 21.3480  | 197  | FlgA | 219    | Periplasmic               | Chaperone  | 2.2070         |
| 95.407     | 21.3540  | 200  | FliN | 137    | Cytoplasmic               | Structural | 2.2009         |
| 95.361     | 21.3680  | 202  | FliH | 228    | Cytoplasmic               | Export     | 2.1869         |
| 94.368     | 21.5162  | 245  | FliS | 136    | Cytoplasmic               | Chaperone  | 2.0387         |
| 93.883     | 21.5544  | 266  | FliG | 331    | Membrane associated       | Structural | 2.0005         |
| 93.583     | 21.5961  | 279  | FlgH | 232    | OM Lipoprotein            | Structural | 1.9588         |
| 87.166     | 22.0514  | 557  | FliI | 457    | Cytoplasmic               | Export     | 1.5035         |
| 83.796     | 22.2189  | 703  | FlgJ | 313    | Periplasmic(67)           | Assembly   | 1.3361         |
| 82.018     | 22.3130  | 780  | MotB | 308    | Membrane anchored         | Structural | 1.2419         |
| 81.072     | 22.3541  | 821  | FliY | 266    | Periplasmic               | ?          | 1.2008         |
| 79.225     | 22.4391  | 901  | FlgN | 138    | Cytoplasmic               | Chaperone  | 1.1158         |
| 78.048     | 22.4958  | 952  | FliA | 239    | Cytoplasmic               | Regulatory | 1.0591         |
| 70.868     | 22.7515  | 1263 | FliH | 130    | Periplasmic               | ?          | 0.8034         |
| 66.898     | 22.8840  | 1435 | FliA | 692    | IM Protein                | Export     | 0.6709         |
| 66.205     | 22.9020  | 1465 | FliJ | 147    | Cytoplasmic               | Export     | 0.6529         |
| 59.65      | 23.0984  | 1749 | FliT | 121    | Cytoplasmic               | Chaperone  | 0.4566         |
| 59.28      | 23.1126  | 1765 | FliM | 334    | Cytoplasmic               | Structural | 0.4423         |
| 57.11      | 23.1824  | 1859 | MotA | 295    | IM Protein                | Structural | 0.3725         |
| 53.948     | 23.2740  | 1996 | FliD | 119    | Cytoplasmic               | Regulatory | 0.2810         |
| 45.568     | 23.5490  | 2359 | FliC | 192    | Cytoplasmic               | Regulatory | 0.0060         |
| 41.736     | 23.6766  | 2525 | FliL | 154    | OM Lipoprotein            | ?          | -0.1217        |
| 40.859     | 23.7039  | 2563 | FliB | 382    | IM Protein                | Export     | -0.1490        |
| 17.544     | 24.7843  | 3573 | FliQ | 89     | IM Protein                | Export     | -1.2294        |
| 17.314     | 24.8102  | 3583 | FliP | 245    | IM Protein                | Export     | -1.2553        |
| 13.805     | 25.0825  | 3735 | FliZ | 183    | Cytoplasmic               | Regulatory | -1.5276        |
| 11.866     | 25.2406  | 3819 | FliR | 261    | IM Protein                | Export     | -1.6857        |

|          |          |         |          |                |        |
|----------|----------|---------|----------|----------------|--------|
| 77.64364 | 21.90035 | 969.5   | 266.8571 | <b>AVERAGE</b> | 1.6546 |
| 93.733   | 21.57525 | 272.5   | 242      | <b>MEDIAN</b>  | 1.5876 |
| 27.17407 | 1.598852 | 1177.18 | 143.2881 | <b>STDEV</b>   | 1.5989 |



**Table S9: Percentiles of flagella, curli, and Type 1 pili proteins (continued).**

| <b>Curli</b>      |                 |             |             |               |                        |                |                       |
|-------------------|-----------------|-------------|-------------|---------------|------------------------|----------------|-----------------------|
| <b>Percentile</b> | <b>Avg Cost</b> | <b>Rank</b> | <b>Name</b> | <b>Length</b> | <b>Location</b>        | <b>Role</b>    | <b>Savings per aa</b> |
| 99.816            | 19.3887         | 9           | CsgA        | 151           | Cell surface appendage | Major          | 4.1662                |
| 98.685            | 20.6517         | 58          | CsgB        | 151           | Cell surface appendage | Minor          | 2.9033                |
| 96.538            | 21.2036         | 151         | CsgC        | 110           | Periplasmic            | ?              | 2.3513                |
| 24.146            | 24.3593         | 3287        | CsgD        | 216           | Cytoplasmic            | Regulatory     | -0.8044               |
| 11.981            | 25.2326         | 3814        | CsgE        | 129           | Periplasmic            | Chaperone      | -1.6776               |
| 88.874            | 21.9725         | 483         | CsgF        | 138           | Periplasmic**          | Chaperone      | 1.5824                |
| 68.006            | 22.8498         | 1387        | CsgG        | 277           | OM Lipoprotein         | export         | 0.7051                |
| 69.72086          | 22.23688        | 1312.714    |             | 167.4286      |                        | <b>AVERAGE</b> | 1.3180                |
| 88.874            | 21.97246        | 483         |             | 151           |                        | <b>MEDIAN</b>  | 1.5824                |
| 37.06872          | 2.066261        | 1605.809    |             | 58.5174       |                        | <b>STDEV</b>   | 2.0663                |

| <b>Type 1 pili</b> |                 |             |             |               |                            |                |                       |
|--------------------|-----------------|-------------|-------------|---------------|----------------------------|----------------|-----------------------|
| <b>Percentile</b>  | <b>Avg Cost</b> | <b>Rank</b> | <b>Name</b> | <b>Length</b> | <b>Location</b>            | <b>Role</b>    | <b>Savings per aa</b> |
| 99.77              | 19.5247         | 11          | FimA        | 182           | Cell surface appendage     | Major          | 4.0302                |
| 10.942             | 25.3265         | 3859        | FimB        | 200           | Cytoplasmic                | regulatory     | -1.7716               |
| 70.291             | 22.7739         | 1288        | FimC        | 241           | Periplasmic                | Chaperone      | 0.7811                |
| 72.115             | 22.7075         | 1209        | FimD        | 878           | OM $\beta$ -barrel protein | export         | 0.8474                |
| 30.772             | 24.0742         | 3000        | FimE        | 198           | Cytoplasmic                | Regulatory     | -0.5193               |
| 84.419             | 22.1852         | 676         | FimF        | 176           | Cell surface appendage     | Adaptor        | 1.3697                |
| 97.554             | 20.9916         | 107         | FimG        | 167           | Cell surface appendage     | Adaptor        | 2.5633                |
| 82.503             | 22.2920         | 759         | FimH        | 300           | Cell surface appendage     | Tip            | 1.2629                |
| 57.941             | 23.1536         | 1823        | FimI        | 179           | Periplasmic                | ?              | 0.4013                |
| 29.156             | 24.1405         | 3070        | FimZ        | 210           | Cytoplasmic                | Regulatory     | -0.5856               |
| 63.5463            | 22.71698        | 1580.2      |             | 273.1         |                            | <b>AVERAGE</b> | 0.7487                |
| 71.203             | 22.74069        | 1248.5      |             | 199           |                            | <b>MEDIAN</b>  | 0.8321                |
| 30.61971           | 1.650011        | 1326.442    |             | 216.1437      |                            | <b>STDEV</b>   | 1.6500                |

\*FliE interacts with FlgB and is likely periplasmic (55, 62).

\*\*CsgF has been shown to be cell surface exposed (73).

**Table S10: Cost savings and amino acid composition or extracellular proteins in *E. coli*.**

| Cost vs Average aa         |                                              | 15.66      | 0.06         | 12.66 | 14.66        | 2.66         | 12.06 | 11.06  | 15.66        | -10.9        | -4.94 | 0.06  | -2.94 | -6.94        | -24.6 | 7.06         | 15.66        | 8.66         | -46.9        | -22.6        | 4.06  |       |
|----------------------------|----------------------------------------------|------------|--------------|-------|--------------|--------------|-------|--------|--------------|--------------|-------|-------|-------|--------------|-------|--------------|--------------|--------------|--------------|--------------|-------|-------|
| Overall                    | ATP/aa                                       | %A         | %R           | %N    | %D           | %C           | %E    | %Q     | %G           | %H           | %I    | %L    | %K    | %M           | %F    | %P           | %S           | %T           | %W           | %Y           | %V    |       |
|                            | MEAN                                         | 23.555     | 9.37         | 5.60  | 3.87         | 5.03         | 1.29  | 5.83   | 4.42         | 7.12         | 2.33  | 6.10  | 10.59 | 4.70         | 2.96  | 3.91         | 4.30         | 5.81         | 5.36         | 1.52         | 2.79  | 7.09  |
|                            | MEDIAN                                       | 23.398     | 9.23         | 5.45  | 3.68         | 5.15         | 1.08  | 5.90   | 4.24         | 7.06         | 2.17  | 5.87  | 10.37 | 4.27         | 2.78  | 3.62         | 4.24         | 5.61         | 5.18         | 1.32         | 2.61  | 6.99  |
|                            | STDEVP                                       | 1.504      | 2.90         | 2.43  | 1.79         | 2.04         | 1.24  | 2.59   | 2.06         | 2.50         | 1.50  | 2.27  | 3.20  | 2.44         | 1.33  | 2.06         | 1.75         | 2.07         | 1.95         | 1.20         | 1.47  | 2.28  |
| Extracellular              | MEAN                                         | 20.652     | 12.11        | 2.535 | 6.911        | 5.805        | 0.566 | 3.0305 | 6.474        | 8.0422       | 0.698 | 4.832 | 8.45  | 4.427        | 1.714 | 2.558        | 2.744        | 9.112        | 9.857        | 0.629        | 2.422 | 7.087 |
| ATP savings per amino Acid | ATP/aa                                       | A          | R            | N     | D            | C            | E     | Q      | G            | H            | I     | L     | K     | M            | F     | P            | S            | T            | W            | Y            | V     |       |
|                            | FliC                                         | 19.155     | 11.85        | 2.21  | 9.64         | 7.83         | 0     | 2.81   | 5.42         | 8.84         | 0     | 5.62  | 7.43  | 5.02         | 0.80  | 1.00         | 1.20         | 8.63         | 13.05        | 0            | 2.01  | 6.63  |
|                            | CsgA                                         | 19.389     | 10.60        | 1.32  | 10.60        | 5.30         | 0     | 1.32   | 7.28         | 19.21        | 1.99  | 3.31  | 5.96  | 2.65         | 1.32  | 2.65         | 1.32         | 9.27         | 5.96         | 0.66         | 2.65  | 6.62  |
|                            | FimA                                         | 19.525     | 19.78        | 1.65  | 6.04         | 4.40         | 1.10  | 1.65   | 5.49         | 8.79         | 1.10  | 3.30  | 8.24  | 2.75         | 0.55  | 3.85         | 1.10         | 7.69         | 12.09        | 0            | 1.10  | 9.34  |
|                            | FlgM                                         | 19.395     | 11.34        | 5.15  | 5.15         | 7.22         | 0     | 5.15   | 6.19         | 3.09         | 0     | 5.15  | 9.28  | 6.19         | 3.09  | 0            | 5.15         | 11.34        | 11.34        | 0            | 0     | 5.15  |
|                            | FlgD                                         | 19.654     | 7.79         | 1.30  | 6.49         | 4.76         | 0     | 3.46   | 6.49         | 10.82        | 0.87  | 6.06  | 9.52  | 1.73         | 1.30  | 1.73         | 3.03         | 10.39        | 15.58        | 0.43         | 0.87  | 7.36  |
|                            | FliK                                         | 19.740     | 12.53        | 1.87  | 2.40         | 6.93         | 0     | 5.07   | 9.60         | 4.53         | 1.87  | 3.73  | 11.20 | 3.20         | 1.07  | 1.87         | 8.80         | 8.27         | 10.67        | 0.27         | 0     | 6.13  |
|                            | FliD                                         | 19.929     | 11.54        | 1.50  | 6.62         | 7.26         | 0     | 1.50   | 4.91         | 6.41         | 0.21  | 6.20  | 9.62  | 5.56         | 1.28  | 1.71         | 0.64         | 14.32        | 14.10        | 0.43         | 2.14  | 4.06  |
|                            | FlgK                                         | 20.471     | 12.07        | 2.93  | 8.59         | 6.76         | 0     | 2.93   | 8.04         | 7.86         | 0.18  | 4.94  | 8.59  | 3.29         | 1.65  | 3.29         | 1.65         | 8.78         | 8.78         | 0.37         | 2.74  | 6.58  |
|                            | FlgE                                         | 20.595     | 10.20        | 1.49  | 11.94        | 5.22         | 0     | 1.99   | 6.22         | 9.70         | 0.25  | 4.23  | 7.46  | 2.99         | 2.24  | 4.23         | 2.74         | 8.71         | 10.70        | 0.50         | 2.49  | 6.72  |
|                            | CsgB                                         | 20.652     | 15.23        | 3.31  | 8.61         | 3.31         | 0     | 1.99   | 9.93         | 9.93         | 0.00  | 7.95  | 6.62  | 5.30         | 3.31  | 1.99         | 0.66         | 8.61         | 5.30         | 0            | 3.97  | 3.97  |
|                            | FlgL                                         | 20.847     | 11.67        | 3.47  | 5.36         | 6.94         | 0     | 5.05   | 8.52         | 5.99         | 0.32  | 4.10  | 8.83  | 4.73         | 3.47  | 2.52         | 1.58         | 10.41        | 8.20         | 0.63         | 2.84  | 5.36  |
|                            | FimG                                         | 20.992     | 13.77        | 1.80  | 4.79         | 5.39         | 1.80  | 1.20   | 5.99         | 7.78         | 1.20  | 4.19  | 7.78  | 3.59         | 1.20  | 1.80         | 1.80         | 9.58         | 12.57        | 1.20         | 3.59  | 8.98  |
|                            | Percent of total savings for each amino Acid | Savings/aa | A            | R     | N            | D            | C     | E      | Q            | G            | H     | I     | L     | K            | M     | F            | P            | S            | T            | W            | Y     | V     |
| FliC                       |                                              | 4.40       | 8.80         | -0.05 | <b>16.59</b> | 9.33         | -0.78 | -8.26  | 2.52         | 6.10         | 5.79  | 0.53  | -0.04 | -0.22        | 3.40  | <b>16.30</b> | -4.97        | <b>10.06</b> | <b>15.14</b> | <b>16.22</b> | 4.02  | -0.43 |
| CsgA                       |                                              | 4.17       | 4.59         | -0.06 | <b>20.43</b> | 0.94         | -0.83 | -13.03 | 7.61         | <b>45.42</b> | 0.90  | 3.30  | -0.07 | 1.45         | 2.72  | 7.48         | -5.04        | <b>13.02</b> | 1.25         | 9.67         | 0.76  | -0.45 |
| FimA                       |                                              | 4.03       | <b>40.43</b> | -0.06 | 6.82         | -2.31        | -0.13 | -12.50 | 2.95         | 6.49         | 3.34  | 3.43  | -0.03 | 1.42         | 4.15  | 0.42         | -5.61        | 7.32         | <b>14.46</b> | <b>17.71</b> | 9.49  | 2.27  |
| FlgM                       |                                              | 4.16       | 7.40         | -0.01 | 3.90         | 7.70         | -0.83 | -1.95  | 4.70         | -15.17       | 6.13  | 1.12  | -0.02 | -1.05        | -0.23 | <b>23.18</b> | 1.45         | <b>20.82</b> | <b>12.45</b> | <b>17.16</b> | 15.18 | -1.89 |
| FlgD                       |                                              | 3.90       | -6.35        | -0.07 | 8.50         | -1.01        | -0.88 | -7.31  | 5.88         | 14.86        | 4.10  | 0.05  | -0.02 | 2.24         | 2.95  | <b>13.79</b> | -2.30        | <b>18.39</b> | <b>22.70</b> | <b>13.09</b> | 11.16 | 0.28  |
| FliK                       |                                              | 3.82       | <b>12.96</b> | -0.06 | -4.89        | 7.31         | -0.90 | -2.40  | <b>15.02</b> | -10.63       | 1.33  | 3.06  | 0.01  | 1.15         | 3.44  | <b>13.22</b> | 8.33         | <b>10.09</b> | 12.04        | <b>15.43</b> | 16.55 | -1.02 |
| FliD                       |                                              | 3.63       | 9.34         | -0.07 | 9.60         | 9.03         | -0.95 | -14.41 | 1.51         | -3.07        | 6.38  | -0.13 | -0.02 | -0.70        | 3.21  | <b>14.98</b> | -7.13        | <b>36.75</b> | <b>20.88</b> | <b>14.16</b> | 4.07  | -3.39 |
| FlgK                       |                                              | 3.08       | <b>13.67</b> | -0.05 | <b>19.37</b> | 8.24         | -1.12 | -11.35 | <b>13.00</b> | 3.75         | 7.62  | 1.86  | -0.04 | 1.34         | 2.95  | 4.98         | -6.08        | <b>15.07</b> | 9.59         | <b>17.59</b> | 0.34  | -0.67 |
| FlgE                       |                                              | 2.96       | 4.36         | -0.08 | <b>34.50</b> | 0.95         | -1.16 | -15.63 | 6.73         | <b>13.65</b> | 7.69  | 3.12  | -0.06 | 1.70         | 1.69  | -2.62        | -3.73        | <b>15.34</b> | 15.61        | <b>16.23</b> | 2.30  | -0.51 |
| CsgB                       |                                              | 2.90       | <b>31.59</b> | -0.05 | <b>20.65</b> | -8.69        | -1.19 | -15.95 | <b>21.01</b> | <b>15.17</b> | 8.78  | -3.15 | -0.08 | -0.61        | -0.85 | <b>16.36</b> | -8.85        | <b>15.11</b> | -0.19        | <b>24.59</b> | -9.24 | -4.36 |
| FlgL                       |                                              | 2.71       | <b>13.29</b> | -0.05 | 6.96         | <b>10.33</b> | -1.27 | -3.47  | <b>16.74</b> | -6.53        | 8.14  | 3.64  | -0.04 | -0.04        | -1.31 | <b>12.65</b> | -7.10        | <b>26.62</b> | 9.09         | <b>15.43</b> | -0.42 | -2.59 |
| FimG                       |                                              | 2.56       | <b>26.87</b> | -0.09 | 4.53         | 2.04         | 0.52  | -21.78 | 6.77         | 4.05         | 4.83  | 3.67  | -0.07 | 1.27         | 4.76  | <b>20.36</b> | -6.90        | <b>23.05</b> | <b>24.37</b> | 5.92         | -7.10 | 3.00  |
| Average                    |                                              | >1.5ATPs   | <b>13.91</b> | -0.06 | <b>12.25</b> | 3.65         | -0.79 | -10.67 | 8.70         | 6.17         | 5.42  | 1.71  | -0.04 | 0.66         | 2.24  | <b>11.76</b> | -3.99        | <b>17.64</b> | <b>13.12</b> | <b>15.27</b> | 3.92  | -0.81 |
| ALL                        | <b>17.60</b>                                 | -0.09      | <b>14.79</b> | 6.47  | -0.57        | -11.87       | 8.58  | -1.23  | 9.30         | 2.78         | -0.06 | -1.79 | 4.54  | <b>10.88</b> | -5.89 | <b>19.54</b> | <b>14.10</b> | <b>15.21</b> | -3.30        | 1.10         |       |       |

**Bold:** Greater than 10% of total savings due to composition of that amino acid

**Percent of Total Cost Savings for *E. coli* Major Extracellular Fiber Subunits**

|      | Excluding Aromatics |         |              |         | Aromatics |       |       |
|------|---------------------|---------|--------------|---------|-----------|-------|-------|
|      | Top 2               | Savings | >10% Savings | Savings | FW        | FYW   | FYWH  |
| CsgA | GN                  | 65.85   | GNS          | 78.86   | 17.16     | 17.91 | 18.81 |
| FimA | AT                  | 54.89   | AT           | 54.89   | 18.13     | 27.62 | 30.96 |
| FliC | NT                  | 31.72   | NTS          | 41.78   | 32.52     | 36.54 | 42.33 |

**Table S11: Flagella protein location vs average synthetic cost (ASC).**

|                                | Student <i>t</i> test (assuming heteroscedastic) |               |              |                 |               |                 | Two tailed       |                 | One tailed       |                 |
|--------------------------------|--------------------------------------------------|---------------|--------------|-----------------|---------------|-----------------|------------------|-----------------|------------------|-----------------|
|                                | Num.                                             | Mean          | Variance     | Degrees Freedom | T crit. value | Pooled Variance | P value          | Critical Value* | P value          | Critical Value* |
| <b><i>vs Cytoplasm</i></b>     | <b>13</b>                                        | <b>22.532</b> | <b>1.364</b> |                 |               |                 |                  |                 |                  |                 |
| IM                             | 10                                               | 23.104        | 2.264        | 17              | 0.994         | 1.750           | 0.33405          | 2.110           | 0.16703          | 1.740           |
| <b>Periplasm</b>               | 9                                                | 21.201        | 1.059        | 19              | 2.821         | 1.242           | <b>0.01091</b>   | 2.093           | <b>0.00546</b>   | 1.729           |
| OM                             | 2                                                | 22.636        | 2.164        | 1               | 0.096         | 1.426           | 0.93899          | 12.706          | 0.46949          | 6.314           |
| <b>Extracellular</b>           | 8                                                | 19.973        | 0.366        | 19              | 6.590         | 0.997           | <b>2.624E-06</b> | 2.093           | <b>1.312E-06</b> | 1.729           |
| <b><i>vs Cyto &amp; IM</i></b> | <b>23</b>                                        | <b>22.780</b> | <b>1.754</b> |                 |               |                 |                  |                 |                  |                 |
| Cytoplasm                      | 13                                               | 22.532        | 1.364        | 28              | 0.584         | 1.617           | 0.56359          | 2.048           | 0.28179          | 1.701           |
| IM                             | 10                                               | 23.104        | 2.264        | 15              | 0.588         | 1.902           | 0.56529          | 2.131           | 0.28265          | 1.753           |
| <b>Periplasm</b>               | 9                                                | 21.201        | 1.059        | 19              | 3.587         | 1.569           | <b>0.00196</b>   | 2.093           | <b>0.00098</b>   | 1.729           |
| OM                             | 2                                                | 22.636        | 2.164        | 1               | 0.134         | 1.772           | 0.91528          | 12.706          | 0.45764          | 6.314           |
| <b>Extracellular</b>           | 8                                                | 19.973        | 0.366        | 26              | 8.036         | 1.419           | <b>1.626E-08</b> | 2.056           | <b>8.128E-09</b> | 1.706           |
| <b><i>vs all flagella</i></b>  | <b>42</b>                                        | <b>21.900</b> | <b>2.556</b> |                 |               |                 |                  |                 |                  |                 |
| Cytoplasm                      | 13                                               | 22.532        | 1.364        | 27              | 1.550         | 2.286           | 0.13273          | 2.052           | 0.06636          | 1.703           |
| <b>IM</b>                      | 10                                               | 23.104        | 2.264        | 14              | 2.246         | 2.504           | <b>0.04139</b>   | 2.145           | <b>0.02069</b>   | 1.761           |
| Periplasm                      | 9                                                | 21.201        | 1.059        | 18              | 1.656         | 2.312           | 0.11504          | 2.101           | 0.05752          | 1.734           |
| OM                             | 2                                                | 22.636        | 2.164        | 1               | 0.688         | 2.547           | 0.61616          | 12.706          | 0.30808          | 6.314           |
| <b>Extracellular</b>           | 8                                                | 19.973        | 0.366        | 29              | 5.902         | 2.237           | <b>2.085E-06</b> | 2.045           | <b>1.043E-06</b> | 1.699           |

**BOLD = Statistically Significant. P < 0.05**

\* 5% Confidence Interval

**Table S12: Comparing flagella ASC/economic rank with subunit stoichiometry or chain length.**

**With FliC included (26 total)**

**Comparing Avg AA Cost & Number of Subunits**

**Linear regression**

$y = 17322 - 761.2x$  R= 0.31913

|                                     |          |
|-------------------------------------|----------|
| <b>Spearman R</b>                   | -0.25497 |
| Rank Difference Squares Sum         | 3662     |
| t-test value for hypothesis $r = 0$ | -1.29179 |
| p-level                             | 0.208733 |
| <b>Kendall Tau</b>                  | -0.12521 |
| Inversions Count                    | 177      |
| Z                                   | 0.896972 |
| p-level                             | 0.369734 |
| <b>Gamma</b>                        | -0.12739 |
| Pearson Correlation Coefficient     | -0.31913 |

**Comparing Economic Rank & Number of Subunits**

**Linear regression**

$y = 1178.2 - 0.4517x$  R= 0.14222

|                                     |          |
|-------------------------------------|----------|
| <b>Spearman R</b>                   | -0.25497 |
| Rank Difference Squares Sum         | 3662     |
| t-test value for hypothesis $r = 0$ | -1.29179 |
| p-level                             | 0.208733 |
| <b>Kendall Tau</b>                  | -0.12521 |
| Inversions Count                    | 177      |
| Z                                   | 0.896972 |
| p-level                             | 0.369734 |
| <b>Gamma</b>                        | -0.12739 |
| Pearson Correlation Coefficient     | -0.14222 |

**Without FliC (25 total)**

**Comparing Avg AA Cost & Number of Subunits**

**Linear regression**

$y = 84.851 - 2.8219x$  R= 0.13516

|                                     |          |
|-------------------------------------|----------|
| <b>Spearman R</b>                   | -0.16159 |
| Rank Difference Squares Sum         | 3012     |
| t-test value for hypothesis $r = 0$ | -0.78528 |
| p-level                             | 0.440307 |
| <b>Kendall Tau</b>                  | -0.05094 |
| Inversions Count                    | 152      |
| Z                                   | 0.356929 |
| p-level                             | 0.721145 |
| <b>Gamma</b>                        | -0.0519  |
| Pearson Correlation Coefficient     | -0.13516 |

**Comparing Economic Rank & Number of Subunits**

**Linear regression**

$y = 28.262 - 0.0055992x$  R= 0.21034

|                                     |          |
|-------------------------------------|----------|
| <b>Spearman R</b>                   | -0.16159 |
| Rank Difference Squares Sum         | 3012     |
| t-test value for hypothesis $r = 0$ | -0.78528 |
| p-level                             | 0.440307 |
| <b>Kendall Tau</b>                  | -0.05094 |
| Inversions Count                    | 152      |
| Z                                   | 0.356929 |
| p-level                             | 0.721145 |
| <b>Gamma</b>                        | -0.0519  |
| Pearson Correlation Coefficient     | -0.21034 |

**Comparing Avg AA cost & Chain Length (all 42 proteins)**

**Linear regression**

|                                     |          |
|-------------------------------------|----------|
| Pearson Correlation Coefficient     | -0.21355 |
| <b>Spearman R</b>                   | -0.18857 |
| Rank Difference Squares Sum         | 14667    |
| t-test value for hypothesis $r = 0$ | -1.21443 |
| p-level                             | 0.231703 |
| <b>Kendall Tau</b>                  | -0.12674 |
| Inversions Count                    | 484      |
| Z                                   | 1.18265  |
| p-level                             | 0.236948 |
| <b>Gamma</b>                        | -0.12689 |
| Pearson Correlation Coefficient     | -0.21355 |

**Table S13: Comparison of protein abundance and average synthetic cost (ASC) or mean amino acid mass in *E. coli*.**

|                                        | Location                               | Proteins | Avg Number per cell | Avg Cost | Avg Mass | Number per cell vs. Avg Cost |                 |                 |                | Number per cell vs. Avg Mass |               |                |               |
|----------------------------------------|----------------------------------------|----------|---------------------|----------|----------|------------------------------|-----------------|-----------------|----------------|------------------------------|---------------|----------------|---------------|
|                                        |                                        |          |                     |          |          | Spearman                     |                 | Pearson         |                | Spearman                     |               | Pearson        |               |
|                                        |                                        |          |                     |          |          | R                            | P value         | R               | P value        | R                            | P value       | R              | P value       |
| <b>Whole Cell Lysates</b>              | Overall                                | 1270     | 1362.67             | 22.98    | 110.58   | <b>-0.1263</b>               | <b>6.31E-06</b> | <b>-0.0717</b>  | <b>0.0105</b>  | <b>-0.0750</b>               | <b>0.0075</b> | -0.0512        | 0.0684        |
|                                        | Overall without Ribosomal Proteins     | 1217     | 529.21              | 22.98    | 110.55   | <b>-0.1349</b>               | <b>2.33E-06</b> | <b>-0.0691</b>  | <b>0.0159</b>  | <b>-0.0995</b>               | <b>0.0005</b> | <b>-0.0578</b> | <b>0.0437</b> |
| <b>Masuda et al 2009(57)</b>           | Cytoplasmic                            | 1022     | 1625.28             | 22.95    | 110.81   | <b>-0.1078</b>               | <b>0.0006</b>   | <b>-0.0902</b>  | <b>0.0039</b>  | <b>-0.0773</b>               | <b>0.0135</b> | <b>-0.0632</b> | <b>0.0435</b> |
|                                        | Cytoplasmic without Ribosomal Proteins | 969      | 592.86              | 22.95    | 110.78   | <b>-0.1187</b>               | <b>0.0002</b>   | <b>-0.0978</b>  | <b>0.0023</b>  | <b>-0.1019</b>               | <b>0.0015</b> | <b>-0.0709</b> | <b>0.0273</b> |
|                                        | Inner membrane                         | 134      | 348.65              | 23.51    | 109.80   | 0.0038                       | 0.9656          | 0.1262          | 0.1461         | -0.1584                      | 0.0676        | 0.0066         | 0.9392        |
|                                        | Integral Membrane Protein              | 81       | 371.32              | 24.27    | 109.84   | 0.1829                       | 0.1022          | <b>0.2394</b>   | <b>0.0313</b>  | -0.1156                      | 0.3042        | <b>0.0061</b>  | <b>0.9570</b> |
|                                        | Inner membrane lipoprotein             | 3        | 162.75              | 21.25    | 107.65   | -                            | -               | -0.8752         | 0.3215         | -                            | -             | -0.8093        | 0.3997        |
|                                        | Membrane anchored                      | 43       | 337.14              | 22.44    | 110.14   | -0.0854                      | 0.5860          | -0.0880         | 0.5747         | -0.1093                      | 0.4854        | 0.0015         | 0.9926        |
|                                        | Membrane associated                    | 3        | 213.32              | 22.65    | 108.07   | -                            | -               | 0.5438          | 0.6340         | -                            | -             | -0.0805        | 0.9487        |
|                                        | Membrane Lipoprotein                   | 3        | 328.33              | 21.77    | 107.64   | -                            | -               | 0.9649          | 0.1691         | -                            | -             | 0.4960         | 0.6696        |
|                                        | Periplasmic w N-term memb anchor       | 1        | 32.03               | 22.16    | 111.15   | -                            | -               | -               | -              | -                            | -             | -              | -             |
|                                        | Periplasmic                            | 63       | 147.88              | 22.76    | 109.65   | <b>-0.3890</b>               | <b>0.0016</b>   | <b>-0.3009</b>  | <b>0.0166</b>  | <b>-0.4100</b>               | <b>0.0008</b> | <b>-0.2913</b> | <b>0.0205</b> |
|                                        | Outer membrane                         | 51       | 265.22              | 22.63    | 109.27   | -0.2168                      | 0.1264          | 0.0290          | 0.8397         | -0.2627                      | 0.0626        | -0.0437        | 0.7609        |
|                                        | Outer membrane Lipoprotein             | 31       | 140.62              | 22.11    | 108.35   | <b>-0.5761</b>               | <b>0.0007</b>   | <b>-0.4159</b>  | <b>0.0200</b>  | <b>-0.4994</b>               | <b>0.0042</b> | <b>-0.3591</b> | <b>0.0472</b> |
|                                        | Outer Membrane $\beta$ -barrel protein | 20       | 458.36              | 23.43    | 110.68   | 0.1579                       | 0.5061          | -0.0841         | 0.7244         | -0.0692                      | 0.7720        | -0.2258        | 0.3385        |
|                                        | <b>Membrane Enriched Fraction</b>      | Overall  | 961                 | 1385.17  | 23.18    | 110.53                       | <b>-0.2868</b>  | <b>1.08E-19</b> | <b>-0.0741</b> | <b>0.0216</b>                | -0.0196       | 0.5440         | -0.0506       |
| Cytoplasmic                            |                                        | 579      | 2265.89             | 22.95    | 110.87   | <b>-0.1250</b>               | <b>0.0026</b>   | <b>-0.1035</b>  | <b>0.0127</b>  | <b>-0.1381</b>               | <b>0.0009</b> | -0.0793        | 0.0566        |
| Inner membrane                         |                                        | 294      | 7.47                | 23.80    | 110.22   | -0.1115                      | 0.0563          | <b>-0.1212</b>  | <b>0.0378</b>  | -0.2400                      | 3.20E-05      | -0.0904        | 0.1221        |
| Integral Membrane Protein              |                                        | 208      | 1.54                | 24.30    | 110.23   | <b>0.1511</b>                | <b>0.0293</b>   | <b>0.1558</b>   | <b>0.0246</b>  | <b>-0.2283</b>               | <b>0.0009</b> | <b>-0.1823</b> | <b>0.0084</b> |
| Inner membrane lipoprotein             |                                        | 3        | 162.75              | 21.25    | 107.65   | -                            | -               | -0.8752         | 0.3215         | -                            | -             | -0.8093        | 0.3997        |
| Membrane anchored                      |                                        | 74       | 9.31                | 22.67    | 110.44   | -0.1596                      | 0.1744          | 0.0930          | 0.4305         | -0.1601                      | 0.1731        | -0.0227        | 0.8478        |
| Membrane associated                    |                                        | 3        | 213.32              | 22.65    | 108.07   | -                            | -               | 0.5438          | 0.6340         | -                            | -             | -0.0805        | 0.9487        |
| Membrane Lipoprotein                   |                                        | 3        | 17.67               | 21.77    | 107.64   | -                            | -               | <b>-0.9998</b>  | <b>0.0138</b>  | -                            | -             | -0.2296        | 0.8525        |
| Periplasmic w N-term memb anchor       |                                        | 3        | 1.58                | 23.12    | 111.58   | -                            | -               | 0.7273          | 0.4816         | -                            | -             | 0.9170         | 0.2612        |
| Periplasmic                            |                                        | 33       | 174.87              | 22.66    | 109.78   | <b>-0.4170</b>               | <b>0.0158</b>   | <b>-0.3849</b>  | <b>0.0270</b>  | <b>-0.3652</b>               | <b>0.0367</b> | <b>-0.3454</b> | <b>0.0490</b> |
| Outer membrane                         |                                        | 54       | 207.98              | 22.57    | 109.14   | 0.0094                       | 0.9461          | 0.0632          | 0.6496         | 0.0271                       | 0.8457        | 0.0328         | 0.8136        |
| Outer membrane Lipoprotein             |                                        | 33       | 96.59               | 22.10    | 108.42   | -0.2361                      | 0.1860          | <b>-0.3545</b>  | <b>0.0429</b>  | -0.1899                      | 0.2898        | -0.2224        | 0.2135        |
| Outer Membrane $\beta$ -barrel protein |                                        | 21       | 383.00              | 23.29    | 110.26   | 0.2519                       | 0.2706          | -0.0215         | 0.9262         | 0.2286                       | 0.3190        | -0.0383        | 0.8689        |
| Cell Surface Appendage                 |                                        | 1        | 1.45                | 19.52    | 99.41    | -                            | -               | -               | -              | -                            | -             | -              | -             |

**BOLD:** P < 0.05

**Notes:** Echobase sequence and location data were merged with abundance values of Masuda et al (57) using ECK numbers. GatA had two abundance values in whole cell lysates. InsH and yi81 have multiple Echobase number but only one ECK number; so ASC and Mass values were averaged.

**Table S13: Comparison of protein abundance and average synthetic cost (ASC) or mean amino acid mass in *E. coli* (continued)**

| Location                           | Proteins                        | Avg Number per cell | Avg Cost | Avg Mass | Number per cell vs. Avg Cost |                 |                |                | Number per cell vs. Avg Mass |                |                |               |        |
|------------------------------------|---------------------------------|---------------------|----------|----------|------------------------------|-----------------|----------------|----------------|------------------------------|----------------|----------------|---------------|--------|
|                                    |                                 |                     |          |          | Spearman                     |                 | Pearson        |                | Spearman                     |                | Pearson        |               |        |
|                                    |                                 |                     |          |          | R                            | P value         | R              | P value        | R                            | P value        | R              | P value       |        |
| Overall                            | 1091                            | 201883.19           | 22.95    | 110.54   | <b>-0.1606</b>               | <b>9.69E-08</b> | <b>0.0653</b>  | <b>0.0309</b>  | <b>-0.0696</b>               | <b>0.0215</b>  | 0.0502         | 0.0973        |        |
| Overall without Ribosomal Proteins | 1038                            | 3685.60             | 22.95    | 110.50   | <b>-0.1747</b>               | <b>1.45E-08</b> | <b>-0.0844</b> | <b>0.0065</b>  | <b>-0.1035</b>               | <b>0.0008</b>  | -0.0388        | 0.2113        |        |
| Cytosolic Fraction                 | 874                             | 251724.34           | 22.91    | 110.75   | <b>-0.1248</b>               | <b>0.0002</b>   | <b>0.0849</b>  | <b>0.0120</b>  | <b>-0.0663</b>               | <b>0.0499</b>  | 0.0530         | 0.1174        |        |
| Cytosolic Fraction                 | 821                             | 4353.39             | 22.91    | 110.72   | <b>-0.1440</b>               | <b>3.44E-05</b> | <b>-0.0980</b> | <b>0.0049</b>  | <b>-0.0995</b>               | <b>0.0043</b>  | -0.0494        | 0.1572        |        |
| Inner membrane                     | 99                              | 428.06              | 23.53    | 109.91   | -0.0805                      | 0.4285          | -0.0532        | 0.6008         | <b>-0.2200</b>               | <b>0.0287</b>  | <b>-0.2605</b> | <b>0.0092</b> |        |
| Ishihama et al 2008(42)            | Integral Membrane Protein       | 59                  | 365.79   | 24.37    | 110.34                       | 0.2052          | 0.1190         | 0.0922         | 0.4872                       | -0.0968        | 0.4657         | -0.0782       | 0.5561 |
|                                    | Inner membrane lipoprotein      | 4                   | 507.25   | 21.60    | 107.92                       | -               | -              | -0.3656        | 0.6344                       | -              | -              | -0.5773       | 0.4227 |
|                                    | Membrane anchored               | 29                  | 457.27   | 22.29    | 109.69                       | -0.3169         | 0.0940         | -0.1789        | 0.3532                       | -0.2479        | 0.1948         | -0.2518       | 0.1876 |
|                                    | Membrane associated             | 4                   | 541.25   | 23.05    | 109.46                       | -               | -              | -0.2223        | 0.7777                       | -              | -              | -0.3074       | 0.6926 |
|                                    | Membrane Lipoprotein            | 2                   | 384.00   | 21.62    | 108.03                       | -               | -              | -              | -                            | -              | -              | -             | -      |
|                                    | Periplasmic w N-term mem anchor | 1                   | 147.00   | 23.44    | 111.77                       | -               | -              | -              | -                            | -              | -              | -             | -      |
| Periplasmic                        | 77                              | 1322.96             | 22.84    | 109.59   | 0.0642                       | 0.0505          | -0.1758        | 0.1262         | -0.2120                      | 0.0642         | -0.1067        | 0.3557        |        |
| Outer membrane                     | 41                              | 2616.32             | 22.61    | 109.27   | -0.2947                      | 0.0615          | -0.0260        | 0.8719         | <b>-0.3497</b>               | <b>0.0250</b>  | -0.1445        | 0.3675        |        |
|                                    | Outer membrane Lipoprotein      | 21                  | 1432.67  | 21.95    | 108.14                       | <b>-0.5651</b>  | <b>0.0076</b>  | <b>-0.4722</b> | <b>0.0307</b>                | <b>-0.4462</b> | <b>0.0426</b>  | -0.2605       | 0.2542 |
|                                    | Outer Membrane β-barrel protein | 20                  | 3859.16  | 23.30    | 110.47                       | 0.1173          | 0.6224         | -0.0602        | 0.8010                       | -0.2165        | 0.3591         | -0.3991       | 0.0813 |

**Note:** 12 proteins excluded (plasmid origins: P07676, P06717, Q00191, P22997, P62593, P27190, P02978, P00642, Q52280, Q57154 - Not in K-12: P15484, P11257)  
**BOLD:** P < 0.05

**Notes:** Echobase sequence and location data was merged with the abundance values of Ishihama et al (42) using Uniprot numbers. We excluded 12 proteins that did not have Echobase information. Ten had plasmid origins: P07676, P06717, Q00191, P22997, P62593, P27190, P02978, P00642, Q52280, Q57154, and two were not found K-12: P15484 and P11257.

**Table S14: Comparison of protein chain length and average synthetic cost (ASC) or mean amino acid mass in *E. coli*.**

| Location                                     |        |            |          |          | Length vs. Avg Cost |                    |                |                    | Length vs. Avg Mass |                    |                |                    |
|----------------------------------------------|--------|------------|----------|----------|---------------------|--------------------|----------------|--------------------|---------------------|--------------------|----------------|--------------------|
|                                              | Number | Avg Length | Resp.    | Avg Mass | Pearson             |                    | Spearman       |                    | Pearson             |                    | Spearman       |                    |
|                                              |        |            | Avg Cost |          | R                   | P value            | R              | P value            | R                   | P value            | R              | P value            |
| <b>Overall - <i>E. coli</i></b>              | 4333   | 312.46     | 23.55    | 111.01   | <b>-0.0992</b>      | <b>5.92E-11</b>    | <b>-0.0503</b> | <b>0.0009</b>      | <b>-0.1225</b>      | <b>6.00E-16</b>    | <b>-0.1738</b> | <b>0, t=-11.62</b> |
| <b>Cytoplasmic</b>                           | 2859   | 296.50     | 23.32    | 111.61   | <b>-0.1329</b>      | <b>9.86E-13</b>    | <b>-0.1263</b> | <b>1.23E-11</b>    | <b>-0.1414</b>      | <b>3.08E-14</b>    | <b>-0.1949</b> | <b>0, t=-10.62</b> |
| <b>Inner membrane</b>                        | 972    | 357.55     | 24.65    | 109.99   | <b>-0.3051</b>      | <b>0, t=-9.98</b>  | <b>-0.2850</b> | <b>1.08E-19</b>    | <b>-0.1115</b>      | <b>0.0005</b>      | <b>-0.1469</b> | <b>4.22E-06</b>    |
| Integral Membrane Protein                    | 777    | 369.58     | 25.01    | 109.78   | <b>-0.4555</b>      | <b>0, t=-14.25</b> | <b>-0.4232</b> | <b>0, t=-13.00</b> | <b>-0.0961</b>      | <b>0.0074</b>      | <b>-0.1275</b> | <b>0.0004</b>      |
| Inner membrane lipoprotein                   | 14     | 485.50     | 21.99    | 109.27   | 0.1662              | 0.5701             | -0.2489        | 0.3908             | 0.0715              | 0.8080             | -0.0419        | 0.8870             |
| Membrane anchored                            | 158    | 284.58     | 23.37    | 110.99   | <b>-0.2592</b>      | <b>0.0010</b>      | <b>-0.2887</b> | <b>0.0002</b>      | -0.1158             | 0.1472             | -0.1588        | 0.0463             |
| Membrane associated                          | 10     | 390.50     | 22.71    | 109.97   | 0.5009              | 0.1403             | 0.4681         | 0.1725             | 0.0841              | 0.8172             | 0.0790         | 0.8282             |
| Membrane Lipoprotein                         | 7      | 439.29     | 22.97    | 109.51   | 0.0601              | 0.8982             | 0.2500         | 0.5887             | 0.5479              | 0.2030             | 0.6071         | 0.1482             |
| Periplasmic w N-term memb anchor             | 6      | 271.33     | 23.48    | 111.99   | -0.4745             | 0.3416             | -0.2571        | 0.6228             | -0.4790             | 0.3364             | -0.3143        | 0.5441             |
| <b>Periplasmic</b>                           | 337    | 309.42     | 22.85    | 109.72   | 0.1030              | 0.0590             | <b>0.1835</b>  | <b>0.0007</b>      | 0.1189              | 0.0291             | 0.1389         | 0.0107             |
| <b>Outer membrane</b>                        | 149    | 334.95     | 22.85    | 109.62   | -0.0217             | 0.7929             | 0.1089         | 0.1862             | 0.0678              | 0.4111             | 0.1858         | 0.0233             |
| Outer membrane Lipoprotein                   | 96     | 216.46     | 22.56    | 109.01   | -0.0435             | 0.6739             | 0.0324         | 0.7543             | 0.0413              | 0.6892             | 0.1490         | 0.1474             |
| Outer Membrane $\beta$ -barrel protein       | 53     | 549.57     | 23.37    | 110.73   | <b>-0.4286</b>      | <b>0.0014</b>      | -0.3440        | 0.0117             | -0.2493             | 0.0718             | -0.1236        | 0.3779             |
| <b>Extracellular</b>                         | 16     | 280.44     | 20.65    | 104.90   | -0.1676             | 0.5351             | -0.1118        | 0.6800             | 0.0041              | 0.9880             | -0.1472        | 0.5865             |
| <b>Yeast All</b>                             | 6732   | 449.90     | 26.59    | 113.20   | <b>-0.1853</b>      | <b>0, t=-15.47</b> | <b>-0.2173</b> | <b>0, t=-18.26</b> | <b>-0.0428</b>      | <b>0.0004</b>      | <b>-0.0952</b> | <b>4.83E-15</b>    |
| <b>Yeast Cytoplasmic</b>                     | 2845   | 498.02     | 25.86    | 112.86   | 0.0164              | 0.3824             | 0.0119         | 0.5261             | 0.0247              | 0.1872             | -0.0078        | 0.6783             |
| <b>Yeast Extracellular</b>                   | 54     | 479.54     | 24.88    | 107.16   | -0.1672             | 0.2268             | 0.0081         | 0.9535             | -0.0316             | 0.8203             | 0.0959         | 0.4905             |
| <b>Yeast Cell Wall</b>                       | 44     | 493.25     | 24.04    | 105.27   | -0.0991             | 0.5220             | 0.0394         | 0.7998             | 0.0073              | 0.9627             | 0.2272         | 0.1381             |
| <b><i>M. tuberculosis</i> All</b>            | 3927   | 339.23     | 22.15    | 107.14   | <b>-0.1116</b>      | <b>2.36E-12</b>    | -0.0171        | 0.2848             | <b>-0.1952</b>      | <b>0, t=-12.47</b> | <b>-0.1437</b> | <b>1.08E-19</b>    |
| <b><i>M. tuberculosis</i> Cytoplasmic</b>    | 2111   | 348.93     | 22.25    | 108.56   | -0.0439             | 0.0438             | -0.0154        | 0.4793             | <b>-0.1451</b>      | <b>2.09E-11</b>    | <b>-0.1841</b> | <b>1.53E-17</b>    |
| <b><i>M. tuberculosis</i> Extracellular</b>  | 140    | 513.19     | 19.45    | 96.00    | <b>-0.4957</b>      | <b>4.73E-10</b>    | <b>-0.4958</b> | <b>4.72E-10</b>    | <b>-0.5585</b>      | <b>7.51E-13</b>    | <b>-0.5670</b> | <b>2.81E-13</b>    |
| <b><i>M. tuberculosis</i> Cell Wall</b>      | 8      | 552.38     | 20.97    | 103.19   | -0.4829             | 0.2255             | -0.0952        | 0.8225             | -0.4522             | 0.2606             | -0.0952        | 0.8225             |
| <b><i>P. syringae</i> All</b>                | 5608   | 329.66     | 23.05    | 110.08   | <b>-0.0967</b>      | <b>3.98E-13</b>    | <b>-0.0595</b> | <b>8.16E-06</b>    | <b>-0.0867</b>      | <b>7.67E-11</b>    | <b>-0.1284</b> | <b>0, t=-9.69</b>  |
| <b><i>P. syringae</i> Cytoplasmic</b>        | 1973   | 317.70     | 22.96    | 110.98   | <b>-0.1083</b>      | <b>1.42E-06</b>    | <b>-0.0913</b> | <b>4.92E-05</b>    | <b>-0.1407</b>      | <b>3.41E-10</b>    | <b>-0.1934</b> | <b>4.34E-18</b>    |
| <b><i>P. syringae</i> Extracellular</b>      | 84     | 433.73     | 21.58    | 107.30   | -0.0855             | 0.4394             | -0.1262        | 0.2525             | -0.0902             | 0.4147             | -0.1653        | 0.1330             |
| <b><i>P. syringae</i> HOPs &amp; helpers</b> | 51     | 437.31     | 21.48    | 107.68   | -0.0635             | 0.6577             | -0.2346        | 0.0975             | -0.0445             | 0.7567             | -0.2175        | 0.1253             |

**BOLD: P < 0.01**

**Table S14: Comparison of protein chain length and average synthetic cost (ASC) or mean amino acid mass in *E. coli* (continued).**

| <i>E. coli</i> proteins |        |            |          |          | Length vs. Avg Cost |                 |                |                 | Length vs. Avg Mass |                    |                |                    |
|-------------------------|--------|------------|----------|----------|---------------------|-----------------|----------------|-----------------|---------------------|--------------------|----------------|--------------------|
| Protein Length          | Number | Avg Length | Avg Cost | Avg Mass | Pearson             |                 | Spearman       |                 | Pearson             |                    | Spearman       |                    |
|                         |        |            |          |          | R                   | P value         | R              | P value         | R                   | P value            | R              | P value            |
| All proteins            | 4333   | 312.46     | 23.55    | 111.01   | <b>-0.0992</b>      | <b>5.92E-11</b> | <b>-0.0503</b> | <b>0.0009</b>   | <b>-0.1225</b>      | <b>6.00E-16</b>    | <b>-0.1738</b> | <b>0, t=-11.62</b> |
| ≤25 amino acids         | 7      | 17.57      | 30.50    | 121.29   | -0.7388             | 0.0578          | -0.8469        | 0.0162          | -0.5140             | 0.2379             | -0.3784        | 0.4026             |
| ≤50 amino acids         | 65     | 37.82      | 25.61    | 113.55   | <b>-0.4416</b>      | <b>2.31E-04</b> | <b>-0.2536</b> | <b>0.0416</b>   | -0.2284             | 0.0672             | -0.1155        | 0.3595             |
| ≤75 amino acids         | 240    | 57.76      | 24.46    | 113.03   | <b>-0.3644</b>      | <b>6.01E-09</b> | <b>-0.2314</b> | <b>0.0003</b>   | -0.1140             | 0.0781             | -0.0710        | 0.2732             |
| ≤100 amino acids        | 478    | 72.91      | 23.95    | 112.32   | <b>-0.3524</b>      | <b>2.01E-15</b> | <b>-0.2698</b> | <b>2.05E-09</b> | <b>-0.1645</b>      | <b>3.04E-04</b>    | <b>-0.1442</b> | <b>0.0016</b>      |
| ≤125 amino acids        | 718    | 86.09      | 23.88    | 112.20   | <b>-0.2215</b>      | <b>2.00E-09</b> | <b>-0.1504</b> | <b>5.20E-05</b> | <b>-0.1172</b>      | <b>0.001658</b>    | <b>-0.1124</b> | <b>0.0026</b>      |
| ≤150 amino acids        | 954    | 98.88      | 23.81    | 112.07   | <b>-0.1888</b>      | <b>4.17E-09</b> | <b>-0.1285</b> | <b>6.90E-05</b> | <b>-0.1104</b>      | <b>6.37E-04</b>    | <b>-0.1131</b> | <b>0.0005</b>      |
| ≤175 amino acids        | 1187   | 111.28     | 23.75    | 111.97   | <b>-0.1697</b>      | <b>4.00E-09</b> | <b>-0.1150</b> | <b>7.15E-05</b> | <b>-0.1092</b>      | <b>1.63E-04</b>    | <b>-0.1129</b> | <b>9.68E-05</b>    |
| ≤200 amino acids        | 1438   | 124.62     | 23.71    | 111.82   | <b>-0.1574</b>      | <b>1.95E-09</b> | <b>-0.1098</b> | <b>2.99E-05</b> | <b>-0.1296</b>      | <b>8.24E-07</b>    | <b>-0.1361</b> | <b>2.22E-07</b>    |
| ≤300 amino acids        | 2403   | 175.21     | 23.64    | 111.50   | <b>-0.1033</b>      | <b>3.90E-07</b> | <b>-0.0549</b> | <b>0.0071</b>   | <b>-0.1451</b>      | <b>8.83E-13</b>    | <b>-0.1504</b> | <b>1.26E-13</b>    |
| ≤500 amino acids        | 3759   | 251.50     | 23.59    | 111.01   | <b>-0.0674</b>      | <b>3.53E-05</b> | -0.0318        | 0.0513          | <b>-0.2223</b>      | <b>0, t=-13.97</b> | <b>-0.2296</b> | <b>0, t=-14.46</b> |
| ≤1000 amino acids       | 4276   | 300.17     | 23.56    | 111.01   | <b>-0.0794</b>      | <b>2.03E-07</b> | <b>-0.0412</b> | <b>0.0070</b>   | <b>-0.1320</b>      | <b>4.45E-18</b>    | <b>-0.1765</b> | <b>0, t=-11.72</b> |
| ≥50 amino acids         | 4272   | 316.39     | 23.53    | 110.97   | <b>-0.0774</b>      | <b>4.13E-07</b> | -0.0331        | 0.0306          | <b>-0.1129</b>      | <b>1.35E-13</b>    | <b>-0.1648</b> | <b>0, t=-10.92</b> |
| ≥100 amino acids        | 3861   | 341.79     | 23.50    | 110.84   | <b>-0.0706</b>      | <b>1.13E-05</b> | -0.0191        | 0.2360          | <b>-0.0830</b>      | <b>2.42E-07</b>    | <b>-0.1303</b> | <b>4.37E-16</b>    |
| ≥150 amino acids        | 3388   | 372.17     | 23.49    | 110.71   | <b>-0.0669</b>      | <b>9.69E-05</b> | -0.0157        | 0.3594          | <b>-0.0465</b>      | <b>0.0068</b>      | <b>-0.0937</b> | <b>4.65E-08</b>    |
| ≥200 amino acids        | 2902   | 405.27     | 23.48    | 110.61   | <b>-0.0767</b>      | <b>3.50E-05</b> | -0.0222        | 0.2311          | -0.0132             | 0.4765             | <b>-0.0595</b> | <b>0.0013</b>      |
| ≥300 amino acids        | 1938   | 482.59     | 23.45    | 110.39   | <b>-0.0848</b>      | <b>1.87E-04</b> | 0.0087         | 0.7017          | <b>0.0695</b>       | <b>0.0022</b>      | <b>0.0699</b>  | <b>0.0021</b>      |
| ≥500 amino acids        | 581    | 709.12     | 23.35    | 110.97   | <b>-0.2317</b>      | <b>1.60E-08</b> | <b>-0.1908</b> | <b>3.64E-06</b> | -0.0355             | 0.3935             | 0.0479         | 0.2488             |
| ≥1000 amino acids       | 57     | 1234.70    | 22.82    | 110.50   | <b>-0.3158</b>      | <b>0.016716</b> | -0.3325        | 0.0115          | -0.1590             | 0.2375             | -0.0148        | 0.9131             |

**BOLD: P < 0.01**



**Table S15: Comparison of the ASCs of extracellular vs intracellular fiber and fiber-associated proteins in *E. coli*.**

|                                    | <u>Intracellular</u>                                                                                                                     | <u>Extracellular</u>                                                                                                                              |
|------------------------------------|------------------------------------------------------------------------------------------------------------------------------------------|---------------------------------------------------------------------------------------------------------------------------------------------------|
| <b>Fiber proteins:</b>             | RecA, MreB, ZapB (YiiU)<br>RodZ (YfgA), FtsZ, MinD                                                                                       | FliC, FlgE, FimA, CsgA<br>PapA* (P04127), FlaK**                                                                                                  |
| <b>Fiber-associated proteins‡:</b> | <i>FtsA, ZipA, ZapA, FtsE</i><br><i>FtsX, FtsK, FtsQ, FtsL</i><br><i>FtsB, FtsW, FtsI, FtsN</i><br><i>MinC, MinE, DicB, MreC</i><br>MreD | <i>FliD, FlgK, FlgL, FlgD, FliK</i><br><i>CsgB, FimF, FimG, FimH,</i><br>PapE (P08407)*, PapF (P08408)*<br>PapG (P13720) *, <i>PapK</i> (P62532)* |

**Note:** Direct fiber-associated proteins (contact major fiber protein) are italicized above

|                                                            | Mean   | Student<br>t Value | P Value† | Degrees<br>of<br>Freedom | Cost<br>Diff<br>(ATP) | U-Test<br>Z | U-Test<br>P Value |
|------------------------------------------------------------|--------|--------------------|----------|--------------------------|-----------------------|-------------|-------------------|
| <b>vs Intracellular Fibers</b>                             | 21.575 |                    |          |                          |                       |             |                   |
| <b>Extracellular Fibers</b>                                | 19.844 | 5.410              | 0.000428 | 9                        | 1.731                 | 2.8823      | 0.00395           |
| <b>Extracellular Fibers without PapA</b>                   | 19.696 | 5.912              | 0.000357 | 8                        | 1.879                 | 2.7386      | 0.00617           |
| <b>Extracellular Fibers without FlaK</b>                   | 19.850 | 4.713              | 0.002175 | 7                        | 1.725                 | 2.7386      | 0.00617           |
| <b>Extracellular Fibers without PapA, FlaK</b>             | 19.666 | 5.087              | 0.003811 | 5                        | 1.909                 | 2.5584      | 0.01052           |
| <b>vs Intracellular Fiber-associated</b>                   | 22.944 |                    |          |                          |                       |             |                   |
| <b>Extracellular Fiber-associated</b>                      | 21.534 | 2.352              | 0.026514 | 26                       | 1.410                 | 2.532       | 0.01134           |
| <b>Extracellular Fiber-associated without Pap Proteins</b> | 20.782 | 4.265              | 0.000269 | 24                       | 2.162                 | 3.4224      | 0.00062           |
| <b>vs Intracellular Direct Fiber-associated</b>            | 22.031 |                    |          |                          |                       |             |                   |
| <b>Extracellular Direct Fiber-associated</b>               | 20.752 | 2.843              | 0.014807 | 12                       | 1.280                 | 1.8074      | 0.0707            |
| <b>Extracellular Direct Fiber-associated without PapK</b>  | 20.536 | 3.512              | 0.004863 | 11                       | 1.495                 | 2.2857      | 0.02227           |
| <b>vs Cytoplasmic Proteins</b>                             | 23.555 |                    |          |                          |                       |             |                   |
| <b>Intracellular Fibers</b>                                | 21.575 | 9.952              | 0.000175 | 5                        | 1.980                 | 3.5948      | 0.00032           |
| <b>Extracellular Fibers</b>                                | 19.844 | 14.685             | 2.65E-05 | 5                        | 3.711                 | 4.1923      | 2.76E-05          |
| <b>Extracellular Fibers without PapA</b>                   | 19.696 | 15.435             | 0.000103 | 4                        | 3.859                 | 3.8367      | 0.00012           |
| <b>Extracellular Fibers without FlaK</b>                   | 19.850 | 11.991             | 0.000277 | 4                        | 3.705                 | 3.8256      | 0.00013           |
| <b>Extracellular Fibers without PapA, FlaK</b>             | 19.666 | 12.157             | 0.001198 | 3                        | 3.889                 | 3.4321      | 0.0006            |
| <b>Intracellular Fiber-associated</b>                      | 22.944 | 1.523              | 0.147252 | 16                       | 0.611                 | 2.4607      | 0.01387           |
| <b>Extracellular Fiber-associated</b>                      | 21.534 | 4.523              | 0.000698 | 12                       | 2.021                 | 4.366       | 1.27E-05          |
| <b>Intracellular Direct Fiber-associated</b>               | 22.031 | 5.334              | 0.003104 | 5                        | 1.524                 | 2.9116      | 0.0036            |
| <b>Extracellular Direct Fiber-associated</b>               | 20.752 | 8.025              | 8.93E-05 | 7                        | 2.803                 | 4.4242      | 9.68E-06          |

† Student *t* test: Assumes Unequal Variance. Confidence Intervals are 2 tailed

\* Not in K-12

\*\* Average ASC of Flagellin phase 2 variable forms in Table S18D (Tab G in Data Set S1). Not in K-12

‡ Intracellular fiber associated proteins located in the cytoplasm or inner membrane compartments.

**Table S16: Calculations of cost savings and fitness.**

| Description                                              | Value calculated/used                         | Literature values and Notes                                                                                                                                                                          |
|----------------------------------------------------------|-----------------------------------------------|------------------------------------------------------------------------------------------------------------------------------------------------------------------------------------------------------|
| Average Doubling Time                                    | 30 minutes                                    | 30 minutes(1)                                                                                                                                                                                        |
| Number of H <sup>+</sup> per ATP                         | 4 (92, 104)                                   | 4 (92, 104)                                                                                                                                                                                          |
| Number of H <sup>+</sup> per flagellar rotation          | 1240 (60)                                     | 800 (59, 65), ~1000 (22), 1200 (23, 71), 1240±240 (60), 1303 (106), 1170-1270 (106), 10-20 (88), 13.4 (12), 100 (45, 53, 59, 71), 170 (88), 200(88), 250 (22), 60-270 (60, 88), 300 (14, 23, 66, 88) |
| Flagella Rotation rates*. **                             | 100Hz (45, 71)                                |                                                                                                                                                                                                      |
| Number of H <sup>+</sup> /s (100Hz, 1flag.)              | 124,000                                       | -                                                                                                                                                                                                    |
| Number of H <sup>+</sup> /s (100Hz, 5flag.)              | 620,000                                       | -                                                                                                                                                                                                    |
| Growth disadvantage flagella                             | -                                             | 2% (71)                                                                                                                                                                                              |
| Flagellar rotation cost**                                | -                                             | 0.1% total energy growth conditions (71)                                                                                                                                                             |
| Growth of flagella                                       | -                                             | 10000 aa/s <sup>49, 50</sup>                                                                                                                                                                         |
| Respiratory chain total                                  | 20 million H <sup>+</sup> /s (71)             | 20 million H <sup>+</sup> /s (71)                                                                                                                                                                    |
| Total H <sup>+</sup> per doubling (30 min.)              | 36 billion                                    | or 9 billion ATPs if all H <sup>+</sup> are converted to ATPs                                                                                                                                        |
| F <sub>0</sub> F <sub>1</sub> -ATPases H <sup>+</sup> /s | -                                             | 3 million (71), 8 million(71)                                                                                                                                                                        |
| ATP molecules in cell                                    | -                                             | 0.5 – 3 million (1), 0.3-1.4 billion(32)                                                                                                                                                             |
| ATP Cost per cell***                                     | 20 billion                                    | 6-11 billion (theoretical) (64), 12-20 billion (experimental) (64), 20-60 billion (2, 94), 55 billion(1)                                                                                             |
| Cost per aa (% each aa is same)                          | 27.36                                         | -                                                                                                                                                                                                    |
| Average Cost per aa (MG1655)                             | 23.555                                        | -                                                                                                                                                                                                    |
| FliC Cost per aa                                         | 19.155                                        | -                                                                                                                                                                                                    |
| FimA Cost per aa                                         | 19.525                                        | -                                                                                                                                                                                                    |
| <u>Flagella: FliC</u>                                    |                                               |                                                                                                                                                                                                      |
| Number of Flagella per cell                              | 5                                             | 0-15(8 typical) (70, 71), 5-10 (71), 10 (1, 23), 9.9±2.9 log & 4.5±2.1 in stationary (49), 6.6±1.4 (46), 6±2 (82), 2.5 to 4.4 (41), 4 (45)                                                           |
| Subunits FliC per flagella                               | 20000 (45, 71)                                | 20000 (20, 22, 45, 55, 71), 5340/helix turn (13, 34), 30000 (110), 33000 (3000x11) (1)                                                                                                               |
| Savings per aa vs average                                | 4.4001                                        | -                                                                                                                                                                                                    |
| Length of FliC                                           | 498 (63)                                      | -                                                                                                                                                                                                    |
| Savings per FliC                                         | 2191.2 ATPs                                   | -                                                                                                                                                                                                    |
| One Gly to Trp substitution in FliC                      | 6,260,000 ATPs                                | using 5 flagella                                                                                                                                                                                     |
| One Gly to Trp substitution in FliC                      | 0.0313%(10 <sup>-4</sup> ) of total cell cost | using 5 flagella and 20 billion ATPs per cell                                                                                                                                                        |
| Total savings per flagellum                              | 43824894 ATP                                  | 20000 FliC subunits                                                                                                                                                                                  |
| Saving for 5 flagella                                    | 219124470 ATP                                 | -                                                                                                                                                                                                    |
| Saving for 5 flagella                                    | 876497883 H <sup>+</sup>                      | 4H <sup>+</sup> /ATP                                                                                                                                                                                 |
| Time Swimming (100Hz ,1 flag.)                           | 1412 seconds                                  | 23.5 min: 1 flag. savings, constantly spinning                                                                                                                                                       |
| % Savings Total Respiratory Chain                        | 2.43%                                         | using 30 minute doubling, 5 flagella                                                                                                                                                                 |
| % Savings ATP Cost per cell                              | 1.096%                                        | using 5 flagella and 20 billion ATPs per cell                                                                                                                                                        |
| <u>Type 1 Pili: FimA</u>                                 |                                               |                                                                                                                                                                                                      |
| Number of Pili per cell                                  | 300                                           | 200-500(15, 45), 100-1000 (71), 100-300(1, 70, 71), 100-200(54), 171-200 (90), 100-500 (103)                                                                                                         |
| Number of FimA per pili                                  | 1000                                          | 1000 (15, 45), 3000 (45), 500 to 3000 (18, 33, 74), >>100(47), ~2800 (33) (19.31nm*27 & 2um)                                                                                                         |
| Savings per aa vs average                                | 4.0302                                        | -                                                                                                                                                                                                    |
| Length of FimA                                           | 182 (63)                                      | -                                                                                                                                                                                                    |
| Savings per FimA                                         | 733.5 ATPs                                    | -                                                                                                                                                                                                    |
| Total savings for Type 1 pili                            | 220048920 ATP                                 | -                                                                                                                                                                                                    |
| Total savings for Type 1 pili                            | 880548129 H <sup>+</sup>                      | 4H <sup>+</sup> /ATP                                                                                                                                                                                 |
| Time Swimming (100Hz ,5 flag.)                           | 1420 seconds                                  | 23.7 minutes: all 5 flagella spinning                                                                                                                                                                |
| % Savings Total Respiratory Chain                        | 2.45%                                         | 30 minute doubling                                                                                                                                                                                   |
| % Savings ATP Cost per cell                              | 1.100%                                        | using 300 fimbriae and 20 billion ATPs per cell                                                                                                                                                      |

**Table S16: Calculations of cost savings and fitness (continued).**Typical Aerobic Gram Negative Organism

|                                                                             |                         |                                                                                                                                                    |
|-----------------------------------------------------------------------------|-------------------------|----------------------------------------------------------------------------------------------------------------------------------------------------|
| Extracellular protein aa cost (50% GC)                                      | 21.443 ATPs/aa          | from equation of line fitting Fig. 5B                                                                                                              |
| Total protein aa cost (50%GC)                                               | 23.492 ATPs/aa          | from equation of line fitting Fig. 5B                                                                                                              |
| Savings per Extracellular protein                                           | 2.0495 ATPs/aa          | 8.274% reduction in cost vs Total proteins                                                                                                         |
| Total proteins/cell                                                         | $2.35 \times 10^6$ (71) | $3.6 \times 10^6$ (1)                                                                                                                              |
| Extracellular proteins/cell                                                 | $5.0 \times 10^5$       | $1 \times 10^6$ (1); 100875 (5 flagella); 300900 (300 Type I Pili); $5 \times 10^5$ S-layer proteins per cell(87)                                  |
| Extracellular protein savings                                               | 1.537%                  | Assumes all amino acids are recovered. 300aa/protein, 2.0495ATPs/aa, $2 \times 10^{10}$ ATPs/cell, $5 \times 10^5$ extracellular proteins per cell |
| Extracellular protein synthetic cost                                        | 16.08%                  | Assumes all amino acids are lost. 300aa/protein, 21.443 ATPs/aa, $2 \times 10^{10}$ ATPs/cell, $5 \times 10^5$ extracellular proteins per cell     |
| Extracellular protein synthetic cost if aa biases equaled cellular proteins | 17.62%                  | Assumes all amino acids are lost. 300aa/protein, 23.492 ATPs/aa, $2 \times 10^{10}$ ATPs/cell, $5 \times 10^5$ extracellular proteins per cell     |

Direct Competition

Assumes savings directly affect doubling times

| Generations | Fold Increase | % Cheaper Organism |
|-------------|---------------|--------------------|
| 100         | 2.922         | 74.503             |
| 200         | 8.539         | 89.516             |
| 250         | 14.596        | 93.588             |
| 500         | 213.043       | 99.533             |
| 1000        | 45387.3       | 99.998             |

**Notes:** Most values are for *E. coli* K-12 or *S. typhimurium* except in a few instances (*Streptococcus* (53, 60))

\*Many values are maximum rates and depend on temperature(14, 60) and other factors such as PMF (28) and pH (59, 65). Values can differ significantly depending on how they are measured (bundle, individual fiber, tethered cell, bead on polyhook, electrorotation of tethered cells) (91)(88). Above 100-175 Hz(19) torque decreases significantly (efficiency plummets) and approaches zero at ~300Hz (effect is greater at lower temperatures and lower pH) (11, 14, 28, 65). For free-swimming cells the motor saturation point is about 100Hz (MacNab in (72)).

\*\* Source of flagella power is PMF. Under aerobic respiration flagella rotation is saturation as it is a small percent of the total protons pumped. Under anaerobic glycolysis, ATP hydrolysis becomes the major source of flagellar power and swimming speed is reduced (71).

\*\*\* Values vary considerably and depend on conditions including growth rate, aerobic vs anaerobic conditions, availability and type of carbon source (glucose vs acetate), etc. Generally aerobic growth and richer media conditions require less ATPs/cell. A good discussion is listed in source (64) (references cited therein are (2, 8, 10, 26, 27, 37, 72, 77, 93-96, 102)). The calculation requires multiplying the cells per gram (dry cell weight) times  $YATP_{max}$  (Number of ATP per gram of cells). Cell weight used in (64) is 0.28pg per cell (40 minutes growth on glucose(71) = 3.6 trillion cells per gram); however, cell weight varies with growth conditions (71) and changes would affect values listed in the table. Theoretical values are smaller than experimental values because the former exclude some cell maintenance cost including component turnover, transport cost, and membrane polarization (64).

**Table S17A: Comparisons of the mean ASCs of proteins in locations of *E. coli* using different cost values.**

|                                             | Number | Akashi & Gojobori |              | Craig & Weber |              | Molecular Mass |              |
|---------------------------------------------|--------|-------------------|--------------|---------------|--------------|----------------|--------------|
|                                             |        | Mean              | % of Overall | Mean          | % of Overall | Mean           | % of Overall |
| <b>Overall</b>                              | 4333   | 23.5549           |              | 20.3139       |              | 111.0052       |              |
| <b>Cytoplasm</b>                            | 2859   | 23.3171           | 98.99        | 19.8168       | 97.55        | 111.6093       | 100.54       |
| <b>Inner Membrane</b>                       | 972    | 24.6529           | 104.66       | 22.2954       | 109.75       | 109.9862       | 99.08        |
| <b>Integral Membrane Protein</b>            | 777    | 25.0102           | 106.18       | 22.9046       | 112.75       | 109.7845       | 98.90        |
| <b>Membrane anchored</b>                    | 158    | 23.3743           | 99.23        | 20.0457       | 98.68        | 110.9876       | 99.98        |
| <b>Periplasmic N-term mem anchor</b>        | 6      | 23.4800           | 99.68        | 19.6510       | 96.74        | 111.9889       | 100.89       |
| <b>Inner Membrane Lipoprotein</b>           | 14     | 21.9869           | 93.34        | 18.3978       | 90.57        | 109.2690       | 98.44        |
| <b>Membrane associated</b>                  | 10     | 22.7075           | 96.40        | 19.2283       | 94.66        | 109.9723       | 99.07        |
| <b>Membrane Lipoprotein*</b>                | 7      | 22.9700           | 97.52        | 19.8973       | 97.95        | 109.5073       | 98.65        |
| <b>Periplasm</b>                            | 337    | 22.8538           | 97.02        | 19.3281       | 95.15        | 109.7200       | 98.84        |
| <b>Outer Membrane</b>                       | 149    | 22.8521           | 97.02        | 19.4946       | 95.97        | 109.6250       | 98.76        |
| <b>OM <math>\beta</math>-barrel protein</b> | 53     | 23.3737           | 99.23        | 20.2872       | 99.87        | 110.7320       | 99.75        |
| <b>OM Lipoprotein</b>                       | 96     | 22.5642           | 95.79        | 19.0570       | 93.81        | 109.0138       | 98.21        |
| <b>Cell surface appendage</b>               | 12     | 20.4738           | 86.92        | 17.1651       | 84.50        | 103.8034       | 93.51        |
| <b>Secreted and released</b>                | 4      | 21.1865           | 89.95        | 17.1547       | 84.45        | 108.1931       | 97.47        |
| <b>Extracellular</b>                        | 16     | 20.6520           | 87.68        | 17.1625       | 84.49        | 104.9008       | 94.50        |

|                       | Number | Cabons per aa |           | Nitrogens per aa |           | Sulfur per aa* |          | Mean $\Delta G$ per aa |           |
|-----------------------|--------|---------------|-----------|------------------|-----------|----------------|----------|------------------------|-----------|
|                       |        | Mean          | % Overall | Mean             | % Overall | Mean           | %Overall | Mean                   | % Overall |
| <b>Overall</b>        | 4333   | 4.9663        |           | 1.3596           |           | 0.0425         |          | 206.0956               |           |
| <b>Cytoplasm</b>      | 2859   | 4.9530        | 99.73     | 1.3857           | 101.92    | 0.0425         | 100.00   | 207.2800               | 100.57    |
| <b>Inner Membrane</b> | 972    | 5.0646        | 101.98    | 1.2950           | 95.25     | 0.0452         | 106.30   | 204.6274               | 99.29     |
| <b>Periplasm</b>      | 337    | 4.8686        | 98.03     | 1.3387           | 98.46     | 0.0371         | 87.33    | 202.4783               | 98.24     |
| <b>Outer Membrane</b> | 149    | 4.8464        | 97.59     | 1.3373           | 98.36     | 0.0394         | 92.57    | 202.7336               | 98.37     |
| <b>Extracellular</b>  | 16     | 4.5437        | 91.49     | 1.2744           | 93.73     | 0.0228         | 53.63    | 191.1559               | 92.75     |

\*U-test of S/aa: Extracellular vs Cytoplasmic, P=1.47E-6. For Sec- (Table S7) %Overall =42.8%, P=1.33E-9.

|                                                     | Mean cost | Spearman |         |         | Kendall |         |         | Pearson |         |         |         |
|-----------------------------------------------------|-----------|----------|---------|---------|---------|---------|---------|---------|---------|---------|---------|
|                                                     |           | R        | t-test  | p value | Tau     | Z       | p value | Gamma   | R       | t-test  | p value |
| <b>vs Akashi &amp; Gojobori</b>                     | 23.555    |          |         |         |         |         |         |         |         |         |         |
| <b>Craig &amp; Weber</b>                            | 20.314    | 0.90471  | 139.756 | →0      | 190.576 | 18809.6 | →0      | 0.73907 | 0.91756 | 151.879 | →0      |
| <b>Molecular Mass</b>                               | 111.005   | 0.57107  | 45.7812 | →0      | 89.0564 | 8789.73 | →0      | 0.42936 | 0.59229 | 48.3777 | →0      |
| <b>Carbons per Amino Acid</b>                       | 4.966     | 0.90249  | 137.894 | →0      | 279.165 | 27553.2 | →0      | 0.91605 | 0.91605 | 150.311 | →0      |
| <b>Nitrogens per Amino Acid</b>                     | 1.360     | 0.05849  | 3.8556  | 0.00012 |         |         |         | 0.05176 | 0.03388 | 2.23099 | 0.02573 |
| <b>Seawater <math>\Delta G</math>(kJ /mol) 18°C</b> | 206.096   | 0.62187  | 52.2601 | →0      | 95.4152 | 9417.33 | →0      | 0.46002 | 0.636   | 54.2393 | →0      |
| <b>vs Molecular Mass</b>                            | 111.005   |          |         |         |         |         |         |         |         |         |         |
| <b>Seawater <math>\Delta G</math>(kJ /mol) 18°C</b> | 206.096   | 0.90002  | 135.896 | →0      |         |         |         | 0.733   | 0.90347 | 138.706 | →0      |
| <b>Carbons per Amino Acid</b>                       | 4.966     | 0.784    | 83.1171 | →0      | 201.118 | 19850   | →0      | 0.61254 | 0.80177 | 88.2911 | →0      |
| <b>Nitrogens per Amino Acid</b>                     | 1.360     | 0.65254  | 56.6727 | →0      |         |         |         | 0.4741  | 0.64499 | 55.5455 | →0      |

**Table S17A: Comparisons of the mean ASCs of proteins in locations of *E. coli* using different cost values (continued).**

| Mann Whitney U Test                                              | Akashi & Gojobori |           | Craig & Weber |           | Molecular Mass |          |
|------------------------------------------------------------------|-------------------|-----------|---------------|-----------|----------------|----------|
|                                                                  | Z                 | p value   | Z             | p value   | Z              | p value  |
| <i>vs Cytoplasm</i>                                              |                   |           |               |           |                |          |
| <b>Inner Membrane</b>                                            | 23.196            | 4.98E-119 | 29.497        | 3.18E-191 | 13.025         | 8.85E-39 |
| <b>Integral Membrane Protein</b>                                 | 27.638            | 3.90E-168 | 34.510        | 5.65E-261 | 13.352         | 1.16E-40 |
| <b>Membrane anchored<br/>Periplasmic w N-term mem<br/>anchor</b> | 0.649             | 0.5164    | 0.013         | 0.9897    | 2.258          | 0.0240   |
| <b>Inner Membrane Lipoprotein</b>                                | 4.153             | 3.28E-05  | 3.795         | 0.0001    | 2.908          | 0.0036   |
| <b>Membrane associated</b>                                       | 1.777             | 0.0755    | 1.286         | 0.1985    | 1.831          | 0.0670   |
| <b>Membrane Lipoprotein*</b>                                     | 1.124             | 0.2609    | 0.470         | 0.6384    | 1.950          | 0.0512   |
| <b>Periplasm</b>                                                 | 6.029             | 1.65E-09  | 5.698         | 1.21E-08  | 9.772          | 1.48E-22 |
| <b>Outer Membrane</b>                                            | 3.713             | 2.05E-04  | 2.510         | 0.0121    | 5.975          | 2.30E-09 |
| <b>OM <math>\beta</math>-barrel protein</b>                      | 0.305             | 0.7604    | 2.374         | 0.0176    | 1.843          | 0.0653   |
| <b>OM Lipoprotein</b>                                            | 4.892             | 9.98E-07  | 4.906         | 9.31E-07  | 6.151          | 7.72E-10 |
| <b>Cell surface appendage</b>                                    | 5.606             | 2.07E-08  | 4.883         | 1.05E-06  | 5.690          | 1.27E-08 |
| <b>Secreted and released</b>                                     | 2.269             | 0.0233    | 2.264         | 0.0236    | 1.980          | 0.0477   |
| <b>Extracellular</b>                                             | 5.983             | 2.19E-09  | 5.355         | 8.55E-08  | 5.912          | 3.38E-09 |
| <i>vs All</i>                                                    |                   |           |               |           |                |          |
| <b>Cytoplasm</b>                                                 | 6.223             | 4.89E-10  | 8.631         | 6.09E-18  | 7.263          | 3.78E-13 |
| <b>Inner Membrane</b>                                            | 19.530            | 6.17E-85  | 24.304        | 1.77E-130 | 8.729          | 2.58E-18 |
| <b>Integral Membrane Protein</b>                                 | 24.013            | 2.05E-127 | 29.427        | 2.51E-190 | 9.405          | 5.20E-21 |
| <b>Membrane anchored<br/>Periplasmic w N-term mem<br/>anchor</b> | 2.102             | 0.0356    | 2.156         | 0.0311    | 0.204          | 0.8381   |
| <b>Inner Membrane Lipoprotein</b>                                | 0.051             | 0.9594    | 0.735         | 0.4621    | 0.807          | 0.4198   |
| <b>Membrane associated</b>                                       | 4.275             | 1.91E-05  | 4.034         | 5.49E-05  | 2.215          | 0.0268   |
| <b>Membrane Lipoprotein*</b>                                     | 2.103             | 0.0355    | 1.777         | 0.0756    | 1.181          | 0.2374   |
| <b>Periplasm</b>                                                 | 1.317             | 0.1878    | 0.836         | 0.4030    | 1.410          | 0.1587   |
| <b>Outer Membrane</b>                                            | 8.243             | 1.69E-16  | 8.648         | 5.25E-18  | 6.727          | 1.74E-11 |
| <b>OM <math>\beta</math>-barrel protein</b>                      | 5.149             | 2.62E-07  | 4.599         | 4.25E-06  | 3.921          | 8.83E-05 |
| <b>OM Lipoprotein</b>                                            | 0.761             | 0.4466    | 0.633         | 0.5269    | 0.479          | 0.6316   |
| <b>Cell surface appendage</b>                                    | 5.890             | 3.86E-09  | 6.231         | 4.62E-10  | 4.559          | 5.14E-06 |
| <b>Secreted and released</b>                                     | 5.567             | 2.60E-08  | 4.958         | 7.12E-07  | 5.496          | 3.89E-08 |
| <b>Extracellular</b>                                             | 2.369             | 0.0179    | 2.393         | 0.0167    | 1.643          | 0.1004   |
|                                                                  | 6.001             | 1.96E-09  | 5.487         | 4.10E-08  | 5.578          | 2.44E-08 |

**Table S17B: Comparisons of the mean ASCs of proteins in locations of *S. cerevisiae* using different cost values.**

|                                      | Number | Wagner<br>Respiratory<br>% of |         | Wagner<br>Fermentative<br>% of |         | Bragg & Wagner<br>Respiratory<br>% of |         | Bragg & Wagner<br>Fermentative<br>% of |         | Amino Acid<br>Molecular Mass<br>% of |         |
|--------------------------------------|--------|-------------------------------|---------|--------------------------------|---------|---------------------------------------|---------|----------------------------------------|---------|--------------------------------------|---------|
|                                      |        | Mean                          | Overall | Mean                           | Overall | Mean                                  | Overall | Mean                                   | Overall | Mean                                 | Overall |
| <b>Overall</b>                       | 6732   | 26.59                         |         | 6.61                           |         | 25.14                                 |         | 5.81                                   |         | 113.20                               |         |
| <b>Cytoplasm</b>                     | 2845   | 25.86                         | 97.25   | 6.46                           | 97.68   | 24.32                                 | 96.73   | 5.61                                   | 96.51   | 112.86                               | 99.70   |
| <b>PM</b>                            | 186    | 27.05                         | 101.70  | 6.54                           | 98.99   | 25.94                                 | 103.17  | 5.94                                   | 102.11  | 111.66                               | 98.64   |
| <b>Integral/Endo Memb.</b>           | 172    | 28.46                         | 107.04  | 6.69                           | 101.22  | 27.42                                 | 109.04  | 6.12                                   | 105.19  | 112.81                               | 99.65   |
| <b>Cell Wall</b>                     | 44     | 24.04                         | 90.39   | 5.64                           | 85.31   | 23.21                                 | 92.30   | 5.18                                   | 89.17   | 105.27                               | 93.00   |
| <b>Extracellular</b>                 | 54     | 24.88                         | 93.54   | 5.92                           | 89.56   | 24.00                                 | 95.46   | 5.44                                   | 93.57   | 107.16                               | 94.66   |
| <b>Extracellular &amp; Cell Wall</b> | 98     | 24.50                         | 92.13   | 5.79                           | 87.65   | 23.65                                 | 94.04   | 5.32                                   | 91.59   | 106.31                               | 93.92   |

|                                              | Mean    | Spearman |        |         | Kendall |       |         | Linear (Pearson) |       |        |         |
|----------------------------------------------|---------|----------|--------|---------|---------|-------|---------|------------------|-------|--------|---------|
|                                              |         | R        | t-test | p value | Tau     | Z     | p value | Gamma            | R     | t-test | p value |
| <b>vs Yeast respiratory (Wagner)</b>         | 26.5937 |          |        |         |         |       |         |                  |       |        |         |
| <b>Yeast respiratory (Bragg&amp;Wagner)</b>  | 25.145  | 0.959    | 278.2  | →0      | 772.5   | 95050 | →0      | 0.83524          | 0.966 | 308.5  | →0      |
| <b>Yeast fermentative (Wagner)</b>           | 6.61024 | 0.677    | 75.37  | →0      | 380.3   | 46794 | →0      | 0.49749          | 0.69  | 78.23  | →0      |
| <b>Yeast fermentative (Bragg&amp;Wagner)</b> | 5.81345 | 0.693    | 78.9   | →0      |         |       |         | 0.51175          | 0.713 | 83.42  | →0      |
| <b>Molecular Mass</b>                        | 113.198 | 0.483    | 45.31  | →0      |         |       |         | 0.34333          | 0.547 | 53.6   | →0      |
| <b>vs Yeast fermentative (Wagner)</b>        |         |          |        |         |         |       |         |                  |       |        |         |
| <b>Yeast respiratory (Bragg&amp;Wagner)</b>  |         | 0.586    | 59.32  | →0      | 237.7   | 29252 | →0      | 0.42314          | 0.604 | 62.11  | →0      |
| <b>Yeast fermentative (Bragg&amp;Wagner)</b> |         | 0.802    | 110.1  | →0      | 520.4   | 64025 | →0      | 0.62318          | 0.855 | 135.1  | →0      |
| <b>Molecular Mass</b>                        |         | 0.59     | 60.02  | →0      |         |       |         | 0.42631          | 0.647 | 69.67  | →0      |

**Table S17B: Comparisons of the mean ASCs of protein in locations of *S. cerevisiae* using different cost values (continued).**

| Mann Whitney U Test                  | Wagner<br>Respiratory |           | Wagner<br>Fermentative |           | Bragg & Wagner<br>Respiratory |           | Bragg & Wagner<br>Fermentative |           | Amino Acid<br>Molecular Mass |           |
|--------------------------------------|-----------------------|-----------|------------------------|-----------|-------------------------------|-----------|--------------------------------|-----------|------------------------------|-----------|
|                                      | Z                     | p value   | Z                      | p value   | Z                             | p value   | Z                              | p value   | Z                            | p value   |
| <i>vs Overall</i>                    |                       |           |                        |           |                               |           |                                |           |                              |           |
| <b>Cytoplasm</b>                     | 14.8616               | 5.85E-50  | 12.7545                | 2.94E-37  | 15.4240                       | 1.13E-53  | 15.0629                        | 2.84E-51  | 5.6203                       | 1.91E-08  |
| <b>PM</b>                            | 4.3898                | 1.13E-05  | 0.2869                 | 0.7741849 | 6.0996                        | 1.06E-09  | 4.9427                         | 7.71E-07  | 7.0659                       | 1.60E-12  |
| <b>Integral/Endo Membranes</b>       | 12.3372               | 5.71E-35  | 3.8335                 | 0.0001263 | 13.2731                       | 3.32E-40  | 9.4490                         | 3.42E-21  | 2.2301                       | 0.0257411 |
| <b>Cell Wall</b>                     | 6.8980                | 5.27E-12  | 8.5229                 | 1.56E-17  | 5.3273                        | 9.97E-08  | 6.1732                         | 6.69E-10  | 8.6931                       | 3.53E-18  |
| <b>Extracellular</b>                 | 4.8461                | 1.26E-06  | 7.1035                 | 1.22E-12  | 3.1973                        | 0.001387  | 12.6762                        | 8.01E-37  | 7.6434                       | 2.11E-14  |
| <b>Extracellular &amp; Cell Wall</b> | 8.1895                | 2.62E-16  | 10.9442                | 7.08E-28  | 5.9212                        | 3.20E-09  | 10.1865                        | 2.28E-24  | 11.4573                      | 2.16E-30  |
| <i>vs Cytoplasm</i>                  |                       |           |                        |           |                               |           |                                |           |                              |           |
| <b>PM</b>                            | 9.0114                | 2.04E-19  | 3.7753                 | 0.0001598 | 10.9088                       | 1.05E-27  | 9.9169                         | 3.52E-23  | 5.6918                       | 1.26E-08  |
| <b>Integral/Endo Membranes</b>       | 16.5602               | 1.35E-61  | 8.1420                 | 3.89E-16  | 17.4758                       | 2.19E-68  | 14.3009                        | 2.16E-46  | 0.7752                       | 0.4382106 |
| <b>Cell Wall</b>                     | 5.7802                | 7.46E-09  | 7.9861                 | 1.39E-15  | 3.7201                        | 0.0001991 | 4.8510                         | 1.23E-06  | 8.5915                       | 8.59E-18  |
| <b>Extracellular</b>                 | 3.0802                | 0.0020684 | 6.0747                 | 1.24E-09  | 1.0085                        | 0.3132149 | 1.8219                         | 0.0684758 | 7.2476                       | 4.24E-13  |
| <b>Extracellular &amp; Cell Wall</b> | 6.1067                | 1.02E-09  | 9.7773                 | 1.41E-22  | 3.2127                        | 0.0013148 | 4.5628                         | 5.05E-06  | 11.0433                      | 2.36E-28  |

**Table S17C: Comparisons of the mean ASCs of proteins in locations of *M. tuberculosis* H37Rv using different cost values.**

|                                      | Number | Akashi & Gojobori<br>% of Overall |         | Craig & Weber<br>% of Overall |         | Molecular Mass<br>% of Overall |         |
|--------------------------------------|--------|-----------------------------------|---------|-------------------------------|---------|--------------------------------|---------|
|                                      |        | Mean                              | Overall | Mean                          | Overall | Mean                           | Overall |
| <b>Overall</b>                       | 3927   | 22.1469                           |         | 19.3088                       |         | 107.1443                       |         |
| <b>Cytoplasm</b>                     | 2111   | 22.2479                           | 100.46  | 19.1672                       | 99.27   | 108.5627                       | 101.32  |
| <b>Cytoplasmic Membrane</b>          | 598    | 22.9850                           | 103.78  | 20.8788                       | 108.13  | 106.1764                       | 99.10   |
| <b>Unknown</b>                       | 1070   | 21.8415                           | 98.62   | 18.9533                       | 98.16   | 106.3746                       | 99.28   |
| <b>Extracellular</b>                 | 140    | 19.4465                           | 87.81   | 17.5376                       | 90.83   | 95.9992                        | 89.60   |
| <b>Cell Wall</b>                     | 8      | 20.9739                           | 94.70   | 17.8469                       | 92.43   | 103.1890                       | 96.31   |
| <b>Extracellular &amp; Cell Wall</b> | 148    | 19.52908                          | 88.18   | 17.55428                      | 90.91   | 96.38786                       | 89.96   |

|                      | Mean cost | Spearman  |             |         | Gamma       | Pearson   |             |         |
|----------------------|-----------|-----------|-------------|---------|-------------|-----------|-------------|---------|
|                      |           | R         | t-test      | p value |             | R         | t-test      | p value |
| vs Akashi & Gojobori | 22.1456   |           |             |         |             |           |             |         |
| Craig & Weber        | 19.3088   | 0.8744062 | 112.9059985 | →0      | 0.697734461 | 0.8728684 | 112.0696964 | →0      |
| Molecular Mass       | 107.1443  | 0.7032694 | 61.97531318 | →0      | 0.532250842 | 0.7803322 | 78.17459575 | →0      |

| Mann Whitney U Test                | Akashi & Gojobori |           | Craig & Weber |           | Molecular Mass |           |
|------------------------------------|-------------------|-----------|---------------|-----------|----------------|-----------|
|                                    | Z                 | p value   | Z             | p value   | Z              | p value   |
| <b>vs Cytoplasm</b>                |                   |           |               |           |                |           |
| <b>Cytoplasmic Membrane</b>        | 10.7167           | 8.495E-27 | 19.0031       | 1.61E-80  | 14.4926        | 1.35E-47  |
| <b>Unknown</b>                     | 8.9557            | 3.375E-19 | 5.1720        | 2.316E-07 | 15.0537        | 3.27E-51  |
| <b>Extracellular</b>               | 12.3710           | 3.752E-35 | 10.6110       | 2.65E-26  | 15.3676        | 2.70E-53  |
| <b>Cell Wall</b>                   | 2.4495            | 0.0143057 | 2.0390        | 0.0414474 | 3.4030         | 0.0006665 |
| <b>Extracellular and Cell Wall</b> | 12.5622           | 3.405E-36 | 10.7611       | 5.26E-27  | 15.6863        | 1.88E-55  |
| <b>vs All</b>                      |                   |           |               |           |                |           |
| <b>Cytoplasm</b>                   | 2.0838            | 0.0371784 | 1.7299        | 0.0836427 | 11.3553        | 6.98E-30  |
| <b>Cytoplasmic Membrane</b>        | 11.7610           | 6.203E-32 | 17.8934       | 1.33E-71  | 7.8344         | 4.66E-15  |
| <b>Unknown</b>                     | 7.5395            | 4.718E-14 | 6.4176        | 1.385E-10 | 7.3012         | 2.85E-13  |
| <b>Extracellular</b>               | 11.8675           | 1.747E-32 | 10.6696       | 1.41E-26  | 13.6224        | 2.95E-42  |
| <b>Cell Wall</b>                   | 2.2392            | 0.025142  | 2.0735        | 0.0381271 | 2.7638         | 0.005713  |
| <b>Extracellular and Cell Wall</b> | 12.0425           | 2.123E-33 | 10.8408       | 2.21E-27  | 13.8675        | 9.96E-44  |



**Table S19: Comparison of the ASC of Type III secretion effectors with cytoplasmic proteins.**

|                                                       | <i>E. coli</i> K-12* |      |              |               | <i>E. coli</i> K-12* |               |         | <i>P. syringae pv. tomato</i> ** |             | <i>P. syringae pv. tomato</i> ** |          |         |
|-------------------------------------------------------|----------------------|------|--------------|---------------|----------------------|---------------|---------|----------------------------------|-------------|----------------------------------|----------|---------|
|                                                       | ASC                  | Num. | Cytoplasm    |               | Overall              |               |         | Cytoplasm                        |             | Overall                          |          |         |
|                                                       |                      |      | Z            | P value       | Z                    | P value       | Savings | Z                                | P value     | Z                                | P value  | Savings |
| Animal Type III Effector†                             | 22.233               | 64   | 5.835        | 5.39E-09      | 6.456                | 1.08E-10      | 1.32    | 4.064                            | 4.81E-05    | 4.225                            | 2.39E-05 | 0.81    |
| Plant Type III Effector†                              | 21.740               | 38   | 7.181        | 6.90E-13      | 7.375                | 1.64E-13      | 1.81    | 5.878                            | 4.16E-09    | 5.766                            | 8.11E-09 | 1.31    |
| Animal and Plant Type III Effector†                   | 22.049               | 102  | 8.928        | 4.35E-19      | 9.561                | 1.17E-21      | 1.51    | 6.722                            | 1.79E-11    | 6.835                            | 8.19E-12 | 1.00    |
| Type III Secretion System, Chaperone†                 | 23.468               | 65   | <b>0.957</b> | <b>0.3385</b> | <b>0.163</b>         | <b>0.8703</b> | 0.09    | 2.764                            | 5.71E-03    | 2.257                            | 0.024037 | -0.42   |
| <i>E. coli</i> Type III Effector†                     | 21.564               | 10   | 3.100        | 1.94E-03      | 3.254                | 1.14E-03      | 1.99    | 2.770                            | 5.60E-03    | 2.743                            | 6.09E-03 | 1.48    |
| <i>E. coli</i> & <i>Salmonella</i> Type III Effector† | 22.162               | 20   | 3.171        | 1.52E-03      | 3.539                | 4.02E-04      | 1.39    | 2.197                            | 0.028041415 | 2.318                            | 0.02046  | 0.88    |
| <i>P. syringae sp.</i> Type III Effector†             | 21.740               | 38   | 7.181        | 6.90E-13      | 7.375                | 1.64E-13      | 1.81    | 5.878                            | 4.16E-09    | 5.766                            | 8.11E-09 | 1.31    |
| <i>P. syringae pv tomato</i> HOPs                     | 21.757               | 44   | 7.966        | 1.67E-15      | 8.123                | 4.54E-16      | 1.80    | 6.679                            | 2.40E-11    | 6.489                            | 8.61E-11 | 1.29    |
| <i>P. syringae pv tomato</i> HOP Helpers              | 19.745               | 7    | 4.450        | 8.59E-06      | 4.424                | 9.67E-06      | 3.81    | 4.387                            | 1.15E-05    | 4.303                            | 1.69E-05 | 3.30    |
| <i>P. syringae pv tomato</i> HOP w Helpers            | 21.480               | 51   | 9.027        | 1.77E-19      | 9.170                | 4.73E-20      | 2.07    | 7.801                            | 6.22E-15    | 7.612                            | 2.70E-14 | 1.57    |

|                                                       | <i>E. coli</i> K-12* |      |              |               | <i>E. coli</i> K-12* |                 | <i>P. syringae pv. tomato</i> ** |                  | <i>P. syringae pv. tomato</i> ** |                 |
|-------------------------------------------------------|----------------------|------|--------------|---------------|----------------------|-----------------|----------------------------------|------------------|----------------------------------|-----------------|
|                                                       | Mean Mass            | Num. | Cytoplasm    |               | Overall              |                 | Cytoplasm                        |                  | Overall                          |                 |
|                                                       |                      |      | Z            | P value       | Z                    | P value         | Z                                | P value          | Z                                | P value         |
| Animal Type III Effector†                             | 109.290              | 64   | 4.062        | 4.87E-05      | 2.817                | 4.84E-03        | 2.661                            | 7.80E-03         | <b>0.789</b>                     | <b>0.429864</b> |
| Plant Type III Effector†                              | 108.600              | 38   | 5.529        | 3.21E-08      | 4.430                | 9.43E-06        | 4.509                            | 6.50E-06         | 2.695                            | 7.03E-03        |
| Animal and Plant Type III Effector†                   | 109.033              | 102  | 6.535        | 6.36E-11      | 4.906                | 9.28E-07        | 4.798                            | 1.60E-06         | 2.259                            | 0.0239          |
| Type III Secretion System, Chaperone†                 | 111.579              | 65   | <b>0.787</b> | <b>0.4310</b> | <b>0.827</b>         | <b>0.408218</b> | <b>1.088</b>                     | <b>0.2765355</b> | 3.525                            | 4.23E-04        |
| <i>E. coli</i> Type III Effector†                     | 108.191              | 10   | 2.366        | 0.0180        | 2.000                | 0.0455          | 2.041                            | 0.0412           | <b>1.447</b>                     | <b>0.148</b>    |
| <i>E. coli</i> & <i>Salmonella</i> Type III Effector† | 109.513              | 20   | 2.339        | 0.0193        | <b>1.609</b>         | <b>0.1076</b>   | <b>1.596</b>                     | <b>0.1106</b>    | <b>0.434</b>                     | <b>0.664</b>    |
| <i>Pseudomonas</i> Type III Effector†                 | 108.600              | 38   | 5.529        | 3.21E-08      | 4.430                | 9.43E-06        | 4.509                            | 6.50E-06         | 2.695                            | 7.03E-03        |
| <i>P. syringae pv tomato</i> HOPs                     | 108.457              | 44   | 6.281        | 3.36E-10      | 5.165                | 2.40E-07        | 5.261                            | 1.43E-07         | 3.423                            | 6.20E-04        |
| <i>P. syringae pv tomato</i> HOP Helpers              | 102.782              | 7    | 4.192        | 2.77E-05      | 4.043                | 5.28E-05        | 4.108                            | 3.98E-05         | 3.863                            | 1.12E-04        |
| <i>P. syringae pv tomato</i> HOP w Helpers            | 107.678              | 51   | 7.368        | 1.73E-13      | 6.284                | 3.29E-10        | 6.384                            | 1.73E-10         | 4.603                            | 4.17E-06        |

|                                  |           | Num. | ASC    | Mean Mass |
|----------------------------------|-----------|------|--------|-----------|
| <i>E. coli</i> K-12*             | Cytoplasm | 2859 | 23.317 | 111.609   |
| <i>E. coli</i> K-12*             | Overall   | 4333 | 23.555 | 111.005   |
| <i>P. syringae pv. tomato</i> ** | Cytoplasm | 1973 | 22.961 | 110.982   |
| <i>P. syringae pv. tomato</i> ** | Overall   | 5608 | 23.047 | 110.075   |

**BOLD ITALIC** = Not significant, P > 0.05

\* Sequences and locations: Echobase(39, 63)

\*\* Sequences and locations: PSORTDB (81)

† From Arnold et al PLOS Pathology 5 (2009)

**Table S20: Amino acid composition and cost savings in different compartments of *P. syringae*.**

|                     | Mean   |       |             |             |             |             |             |       |       |             |             |       |             |             |             |      |             |             |             |             | Total | Number |       |
|---------------------|--------|-------|-------------|-------------|-------------|-------------|-------------|-------|-------|-------------|-------------|-------|-------------|-------------|-------------|------|-------------|-------------|-------------|-------------|-------|--------|-------|
|                     | ATPs   | %A    | %R          | %N          | %D          | %C          | %E          | %Q    | %G    | %H          | %I          | %L    | %K          | %M          | %F          | %P   | %S          | %T          | %W          | %Y          | %V    |        | Amino |
|                     | per aa |       |             |             |             |             |             |       |       |             |             |       |             |             |             |      |             |             |             |             |       | Acids  |       |
| Overall Mean        | 23.05  | 10.55 | 6.45        | 3.09        | 5.36        | 1.13        | 5.66        | 4.48  | 7.47  | 2.33        | 5.03        | 11.20 | 4.00        | 2.58        | 3.67        | 4.75 | 6.14        | 5.07        | 1.41        | 2.49        | 7.13  | 329.67 | 5607  |
| Overall Median      | 22.94  | 10.37 | 6.36        | 2.96        | 5.44        | 0.91        | 5.67        | 4.36  | 7.39  | 2.23        | 4.92        | 10.97 | 3.54        | 2.37        | 3.51        | 4.63 | 5.93        | 4.95        | 1.23        | 2.41        | 7.06  | 282.00 |       |
| Overall STDEVP      | 1.37   | 3.01  | 2.48        | 1.48        | 1.98        | 1.09        | 2.30        | 1.99  | 2.43  | 1.38        | 1.98        | 3.28  | 2.40        | 1.25        | 1.74        | 1.96 | 2.09        | 1.89        | 1.11        | 1.33        | 2.19  | 276.48 |       |
| Extracellular all   | 21.58  | 10.90 | 4.93        | <b>4.89</b> | 6.06        | <b>0.60</b> | 4.52        | 4.86  | 8.26  | 2.40        | 4.13        | 8.59  | 4.76        | 2.22        | 3.04        | 4.95 | <b>9.12</b> | <b>6.61</b> | <b>0.85</b> | 2.30        | 6.00  | 433.73 | 84    |
| Extracellular - HOP | 21.74  | 11.08 | <b>4.00</b> | <b>4.85</b> | <b>6.76</b> | <b>0.69</b> | <b>4.03</b> | 4.56  | 8.82  | <b>1.71</b> | 4.52        | 8.44  | 4.16        | <b>1.88</b> | 3.28        | 4.44 | <b>8.26</b> | <b>7.75</b> | <b>1.22</b> | 2.77        | 6.80  | 428.18 | 33    |
| HOPs w Helpers      | 21.48  | 10.79 | 5.54        | <b>4.91</b> | 5.60        | <b>0.55</b> | 4.84        | 5.06  | 7.90  | 2.85        | 3.87        | 8.69  | <b>5.16</b> | 2.44        | 2.89        | 5.29 | <b>9.67</b> | <b>5.87</b> | <b>0.61</b> | 2.00        | 5.48  | 437.31 | 51    |
| Outer Membrane      | 22.25  | 10.09 | 5.86        | <b>4.96</b> | 6.43        | <b>0.34</b> | 4.69        | 5.04  | 8.99  | <b>1.35</b> | <b>3.72</b> | 9.56  | 3.67        | <b>1.55</b> | 3.47        | 4.22 | <b>7.84</b> | <b>6.45</b> | 1.42        | <b>3.84</b> | 6.52  | 649.23 | 115   |
| Periplasm           | 22.65  | 11.41 | <b>4.18</b> | 3.85        | 6.27        | <b>0.63</b> | 5.08        | 4.55  | 7.74  | <b>1.50</b> | 4.56        | 9.37  | <b>6.54</b> | 2.40        | 3.71        | 5.19 | 6.17        | 5.43        | 1.38        | 2.77        | 7.26  | 414.95 | 110   |
| Inner Membrane      | 23.83  | 11.36 | 5.38        | 2.66        | <b>3.63</b> | <b>0.81</b> | <b>3.90</b> | 3.72  | 8.18  | 1.76        | 6.18        | 13.93 | <b>2.80</b> | 3.05        | <b>4.59</b> | 4.43 | 6.17        | 5.09        | <b>1.90</b> | 2.41        | 8.05  | 412.61 | 961   |
| Unknown             | 22.91  | 10.73 | 6.46        | 3.21        | 5.42        | 1.20        | 5.43        | 4.85  | 7.28  | 2.32        | 4.55        | 10.56 | 4.28        | 2.59        | 3.50        | 5.03 | 6.51        | 5.31        | 1.46        | 2.56        | 6.74  | 282.73 | 2364  |
| Cytoplasm           | 22.96  | 9.91  | 7.19        | 2.92        | 5.99        | 1.29        | 6.93        | 4.36  | 7.20  | 2.72        | 5.19        | 10.96 | 4.10        | 2.43        | 3.48        | 4.56 | 5.44        | 4.63        | 1.13        | 2.35        | 7.21  | 317.70 | 1973  |
| Cost Savings (ATP)  |        | 15.66 | 0.06        | 12.66       | 14.66       | 2.66        | 12.06       | 11.06 | 15.66 | -10.9       | -4.94       | 0.06  | -2.94       | -6.94       | -24.6       | 7.06 | 15.66       | 8.66        | -46.9       | -22.6       | 4.06  |        |       |

**Notes: Bold** indicates >25% change in amino acid composition from the overall mean.

**Underlined** indicates >50% change in amino acid composition from the overall mean.

Amino acid percents are on a per protein basis. The percent amino acid composition of each protein in that location were averaged; they are unweighted for chain length. See Table S22B for weighted percents (% of all amino acids) of proteins in nonmembrane locations of *P. syringae*.

|                    | Savings   | A            | R     | N            | D            | C     | E      | Q     | G            | H      | I    | L     | K     | M    | F            | P     | S            | T            | W            | Y            | V     | Count |
|--------------------|-----------|--------------|-------|--------------|--------------|-------|--------|-------|--------------|--------|------|-------|-------|------|--------------|-------|--------------|--------------|--------------|--------------|-------|-------|
| Extracellular-HOPs | >1.5 ATPs | <b>13.34</b> | -0.08 | <b>13.86</b> | 8.64         | -0.95 | -9.75  | 0.79  | 8.47         | 6.45   | 1.01 | -0.08 | -0.49 | 2.28 | 5.39         | -5.29 | <b>25.09</b> | <b>12.51</b> | <b>16.96</b> | 2.07         | -0.23 | 14    |
| Extracellular-HOPs | >0 ATPs   | <b>17.00</b> | -0.10 | <b>13.25</b> | <b>12.36</b> | -0.48 | -11.11 | -3.07 | <b>18.47</b> | 2.37   | 1.13 | -0.06 | -0.35 | 3.52 | 7.54         | -4.09 | <b>21.40</b> | 9.43         | 9.25         | 5.36         | -1.82 | 23    |
| HOPS and Helpers   | >1.5 ATPs | <b>11.61</b> | -0.03 | <b>10.16</b> | 0.00         | -0.93 | -6.04  | 3.22  | 7.12         | 1.22   | 3.18 | -0.06 | -1.13 | 1.17 | <b>11.20</b> | 2.36  | <b>25.68</b> | 4.94         | <b>18.70</b> | <b>10.16</b> | -2.53 | 24    |
| HOPS and Helpers   | >0 ATPs   | -3.64        | -0.05 | <b>17.69</b> | 1.88         | -1.29 | -5.84  | 6.24  | 0.45         | -12.90 | 5.33 | -0.12 | -4.00 | 1.75 | 4.86         | 2.20  | <b>53.36</b> | 1.16         | <b>38.54</b> | 2.77         | -8.39 | 47    |
| Extracellular All  | >1.5 ATPs | <b>12.25</b> | -0.05 | <b>11.53</b> | 3.19         | -0.94 | -7.41  | 2.33  | 7.62         | 3.15   | 2.38 | -0.07 | -0.90 | 1.58 | 9.06         | -0.46 | <b>25.46</b> | 7.73         | <b>18.06</b> | 7.18         | -1.68 | 38    |
| Extracellular All  | >0 ATPs   | 3.14         | -0.06 | <b>16.23</b> | 5.32         | -1.02 | -7.57  | 3.18  | 6.37         | -7.88  | 3.95 | -0.10 | -2.80 | 2.33 | 5.74         | 0.13  | <b>42.86</b> | 3.88         | <b>28.92</b> | 3.62         | -6.23 | 70    |

**Table S21: Comparison of the ASC of cellular and extracellular serine proteases.**

|                                                            | ASC    | Mass    | Number | Length  | U-Test |          | Student <i>t</i> test |           |          | Savings (ATP) |             |
|------------------------------------------------------------|--------|---------|--------|---------|--------|----------|-----------------------|-----------|----------|---------------|-------------|
|                                                            |        |         |        |         | Z      | P value  | T                     | Deg. Free | P value  | per aa        | per protein |
| <b>vs Cellular Serine proteases</b>                        | 22.547 | 109.500 | 5592   | 494.01  |        |          |                       |           |          |               |             |
| <b>All Extracellular Serine proteases</b>                  | 22.157 | 107.408 | 191    | 737.93  | 4.700  | 2.60E-06 | 5.872                 | 206       | 1.71E-08 | 0.390         | 287.97      |
| <b>Extracellular Serine proteases†</b>                     | 21.827 | 106.596 | 82     | 897.34  | 6.474  | 9.52E-11 | 6.657                 | 84        | 2.70E-09 | 0.720         | 646.09      |
| <b>vs <i>Bacillus sp.</i> Cellular Serine proteases</b>    | 22.454 | 108.502 | 447    | 502.75  |        |          |                       |           |          |               |             |
| <b><i>Bacillus sp.</i> Extracellular Serine proteases</b>  | 21.210 | 103.899 | 23     | 455.61  | 5.185  | 2.16E-07 | 6.558                 | 25        | 7.19E-07 | 1.245         | 567.08      |
| <b><i>Bacillus sp.</i> Extracellular Serine proteases†</b> | 21.273 | 104.409 | 18     | 485.87  | 4.305  | 1.67E-05 | 5.244                 | 19        | 4.62E-05 | 1.181         | 573.85      |
| <b>vs <i>E. coli</i> Cellular Serine proteases</b>         | 23.126 | 110.089 | 192    | 401.68  |        |          |                       |           |          |               |             |
| <b><i>E. coli</i> Extracellular Serine proteases</b>       | 22.381 | 107.912 | 10     | 1335.56 | 3.856  | 1.15E-04 | 6.581                 | 64        | 1.01E-08 | 0.745         | 995.41      |
| <b><i>E. coli</i> Extracellular Serine proteases †</b>     | 22.319 | 107.914 | 8      | 1335.60 | 3.822  | 1.33E-04 | 6.729                 | 49        | 1.74E-08 | 0.807         | 1077.88     |
| <b><i>E. coli</i> Extracellular Serine proteases ‡</b>     | 21.994 | 107.306 | 10     | 1005.30 | 4.639  | 3.51E-06 | 8.443                 | 30        | 2.02E-09 | 1.133         | 1138.73     |
| <b><i>E. coli</i> Extracellular Serine proteases †,‡</b>   | 21.973 | 107.316 | 8      | 1005.69 | 4.302  | 1.69E-05 | 8.461                 | 23        | 1.62E-08 | 1.154         | 1160.14     |
| <b>vs <i>E. coli</i> K-12 Cytoplasm</b>                    | 23.555 | 111.005 | 4333   | 312.46  |        |          |                       |           |          |               |             |
| <b><i>E. coli</i> Cellular Serine proteases</b>            | 23.126 | 110.089 | 192    | 401.68  | 6.214  | 5.16E-10 | 4.546                 | 216       | 9.09E-06 | 0.429         | 172.14      |
| <b><i>E. coli</i> Cellular Serine proteases †</b>          | 23.142 | 110.393 | 26     | 387.65  | 2.151  | 3.15E-02 | 1.478                 | 25        | 0.152    | 0.412         | 159.88      |
| <b><i>E. coli</i> Extracellular Serine proteases</b>       | 22.381 | 107.912 | 10     | 1335.56 | 3.299  | 9.70E-04 | 16.626                | 11        | 3.84E-09 | 1.174         | 1567.75     |
| <b><i>E. coli</i> Extracellular Serine proteases†</b>      | 22.319 | 107.914 | 8      | 1335.60 | 3.005  | 2.66E-03 | 16.631                | 9         | 4.59E-08 | 1.236         | 1650.24     |
| <b><i>E. coli</i> Extracellular Serine proteases ‡</b>     | 21.994 | 107.306 | 10     | 1005.30 | 4.108  | 3.99E-05 | 15.490                | 10        | 2.57E-08 | 1.561         | 1569.54     |
| <b><i>E. coli</i> Extracellular Serine proteases †,‡</b>   | 21.973 | 107.316 | 8      | 1005.69 | 3.720  | 1.99E-04 | 15.259                | 8         | 3.37E-07 | 1.582         | 1591.13     |

**Note:** Cellular serine proteases are serine proteases from Uniprot that are not secreted

† Homologs (Genes with same name and similar ASC, lengths, sequences) were averaged

‡ All the *E. coli* secreted serine proteases were autotransporters. Just the secreted domain was analyzed here.

Autotransporters are bacterial proteins that contain a  $\beta$ -domain which integrates into the outer membrane and assists the translocation of an  $\alpha$ -domain to the cell surface where it is often cleaved autolytically or by other proteases (38). While  $\beta$ -domains have high similarity,  $\alpha$ -domains are quite diverse and function as enzymes (protease, esterase, lipase) or assist cell aggregation, actin polymerization, or other virulent activities (38). While most  $\beta$ -domains had average ASCs, all the  $\alpha$ -domains except IgA1 protease had lower ASCs. On average,  $\alpha$ -domains had an 8.7% lower ASC than their respective  $\beta$ -domain (See Table S18C – Tab F in Data Set S1).

**Table S22A: Effects of protein structure on ASC in *E. coli*.**

**Mean values based on per protein amounts (unweighted for length)**

|               | Count | Mean    |         |        | Filtered Database |       |       | Neural Networks only |       |       | Unfiltered Database† |       |       |
|---------------|-------|---------|---------|--------|-------------------|-------|-------|----------------------|-------|-------|----------------------|-------|-------|
|               |       | Mass/aa | ATPs/aa | Length | %H                | %E    | %C    | %H                   | %E    | %C    | %H                   | %E    | %C    |
| Overall       | 3212  | 111.38  | 23.26   | 297.75 | 39.82             | 17.54 | 42.64 | 41.41                | 17.80 | 40.79 | 33.91                | 21.14 | 44.95 |
| Cytoplasmic   | 2859  | 111.61  | 23.32   | 296.47 | 40.58             | 17.08 | 42.33 | 42.40                | 17.27 | 40.33 | ND                   | ND    | ND    |
| Periplasmic   | 337   | 109.72  | 22.85   | 309.42 | 33.85             | 20.96 | 45.18 | 33.47                | 22.00 | 44.53 | 34.13                | 20.88 | 45.00 |
| Extracellular | 16    | 104.90  | 20.65   | 280.44 | 29.29             | 26.64 | 44.07 | 31.14                | 24.82 | 44.04 | 29.38                | 26.72 | 43.90 |

**Linear Correlation**

vs ASC (ATPs/aa)

|               | Filtered Database |         |         |         |         |         | Neural Networks only |         |         |               |         |         | Unfiltered Database† |         |         |         |         |         |
|---------------|-------------------|---------|---------|---------|---------|---------|----------------------|---------|---------|---------------|---------|---------|----------------------|---------|---------|---------|---------|---------|
|               | %H                |         | %E      |         | %C      |         | %H                   |         | %E      |               | %C      |         | %H                   |         | %E      |         | %C      |         |
|               | R                 | P value | R       | P value | R       | P value | R                    | P value | R       | P value       | R       | P value | R                    | P value | R       | P value | R       | P value |
| Overall       | 0.0408            | 0.0208  | -0.0291 | 0.0996  | -0.0360 | 0.0412  | -0.0010              | 0.9527  | 0.0164  | 0.3514        | -0.0174 | 0.3249  | 0.0167               | 0.3440  | -0.0172 | 0.3290  | -0.0072 | 0.6815  |
| Cytoplasmic   | 0.0219            | 0.2408  | 0.0011  | 0.9552  | -0.0379 | 0.0427  | -0.0311              | 0.0964  | 0.0501  | <b>0.0073</b> | -0.0023 | 0.9003  | ND                   | ND      | ND      | ND      | ND      | ND      |
| Periplasmic   | -0.0102           | 0.8518  | -0.0622 | 0.2547  | 0.0939  | 0.0852  | -0.0300              | 0.5826  | -0.0184 | 0.7359        | 0.0798  | 0.1439  | -0.0121              | 0.8255  | -0.0619 | 0.2572  | 0.0963  | 0.0776  |
| Extracellular | 0.2177            | 0.4179  | 0.0324  | 0.9053  | -0.4340 | 0.0931  | 0.3288               | 0.2138  | -0.0063 | 0.9816        | -0.5458 | 0.0287  | 0.2022               | 0.4528  | 0.0599  | 0.8255  | -0.4339 | 0.0931  |

Notes: ND - Not Done **BOLD:** P < 0.01 † Overall contains only data from Periplasmic and Extracellular proteins

**Comparing Protein Secondary Structure between Locations**

| vs Cytoplasmic   | Filtered Database |              |              |              | Neural Networks Only |              |              |              |
|------------------|-------------------|--------------|--------------|--------------|----------------------|--------------|--------------|--------------|
|                  | Student t*        |              | Mann Whitney |              | Student t*           |              | Mann Whitney |              |
|                  | T value           | P value      | Z            | P value      | T value              | P value      | Z            | P value      |
| %H Periplasmic   | 6.622             | 1.16E-10     | 7.199        | 6.05E-13     | 9.639                | 1.08E-19     | 10.347       | 4.32E-25     |
| %E Periplasmic   | 5.317             | 1.79E-07     | 4.551        | 5.33E-06     | 7.341                | 1.21E-12     | 7.734        | 1.04E-14     |
| %C Periplasmic   | 4.768             | 2.62E-06     | 5.507        | 3.65E-08     | 8.383                | 8.15E-16     | 9.792        | 1.22E-22     |
| %H Extracellular | 2.023             | <b>0.061</b> | 2.487        | 0.013        | 2.695                | 0.017        | 3.058        | 0.002        |
| %E Extracellular | 2.212             | 0.043        | 2.108        | 0.035        | 2.305                | 0.036        | 2.628        | 0.009        |
| %C Extracellular | 0.557             | <b>0.586</b> | 0.656        | <b>0.512</b> | 1.498                | <b>0.155</b> | 1.348        | <b>0.178</b> |

Notes: Comparisons are versus same % secondary structure in cytoplasmic proteins

\* Assumes unequal variance, two tailed. **BOLD** – P > 0.01. H-Helix, E- Strand, C-Coil.

**Table S22A: Effects of protein structure on ASC in *E. coli* (continued).**

|               |        | Filtered Database (Percent of all amino acids in the Secondary Structure of each location) |      |      |      |      |       |      |       |       |      |      |      |      |      |      |       |       |       |      |      |
|---------------|--------|--------------------------------------------------------------------------------------------|------|------|------|------|-------|------|-------|-------|------|------|------|------|------|------|-------|-------|-------|------|------|
|               |        | %A                                                                                         | %C   | %D   | %E   | %F   | %G    | %H   | %I    | %K    | %L   | %M   | %N   | %P   | %Q   | %R   | %S    | %T    | %V    | %W   | %Y   |
| Overall       | Helix  | 12.77                                                                                      | 1.06 | 4.77 | 8.46 | 3.47 | 3.06  | 2.23 | 5.71  | 13.09 | 5.21 | 2.92 | 3.02 | 2.24 | 6.03 | 7.11 | 4.63  | 4.14  | 5.79  | 1.51 | 2.76 |
|               | Coil   | 7.37                                                                                       | 1.32 | 7.75 | 5.68 | 2.74 | 12.23 | 2.91 | 3.24  | 6.23  | 4.86 | 2.40 | 5.73 | 7.80 | 4.07 | 5.20 | 6.97  | 5.91  | 4.29  | 1.01 | 2.29 |
|               | Strand | 6.72                                                                                       | 1.70 | 2.57 | 4.31 | 5.42 | 3.58  | 2.32 | 11.40 | 12.37 | 3.31 | 2.60 | 2.01 | 1.38 | 2.96 | 5.06 | 4.26  | 6.51  | 15.38 | 1.82 | 4.31 |
| Cytoplasm     | Helix  | 12.63                                                                                      | 1.09 | 4.76 | 8.74 | 3.45 | 3.02  | 2.33 | 5.78  | 13.13 | 5.09 | 2.92 | 2.95 | 2.23 | 5.97 | 7.33 | 4.52  | 4.06  | 5.79  | 1.50 | 2.74 |
|               | Coil   | 7.25                                                                                       | 1.38 | 7.69 | 5.86 | 2.79 | 12.33 | 3.04 | 3.29  | 6.38  | 4.68 | 2.43 | 5.51 | 7.79 | 3.99 | 5.40 | 6.86  | 5.79  | 4.30  | 0.98 | 2.26 |
|               | Strand | 6.68                                                                                       | 1.86 | 2.53 | 4.46 | 5.43 | 3.53  | 2.43 | 11.71 | 12.58 | 3.20 | 2.63 | 1.84 | 1.37 | 2.81 | 5.18 | 4.07  | 6.27  | 15.54 | 1.76 | 4.13 |
| Extracellular | Helix  | 12.79                                                                                      | 0.33 | 5.53 | 3.73 | 3.00 | 3.26  | 0.40 | 5.93  | 13.32 | 5.53 | 1.73 | 6.53 | 0.60 | 9.13 | 2.93 | 9.46  | 7.79  | 4.86  | 0.67 | 2.47 |
|               | Coil   | 12.01                                                                                      | 0.46 | 7.90 | 2.98 | 1.74 | 13.44 | 0.46 | 2.46  | 4.41  | 4.05 | 1.64 | 9.65 | 4.82 | 3.85 | 1.64 | 10.83 | 11.29 | 4.82  | 0.31 | 1.23 |
|               | Strand | 9.74                                                                                       | 0.29 | 3.47 | 2.22 | 3.66 | 4.05  | 1.06 | 8.20  | 9.74  | 3.09 | 1.25 | 3.66 | 1.54 | 7.62 | 2.60 | 6.17  | 12.54 | 13.60 | 0.77 | 4.73 |
| Periplasm     | Helix  | 14.22                                                                                      | 0.86 | 4.75 | 5.94 | 3.74 | 3.41  | 1.24 | 5.04  | 12.76 | 6.48 | 3.01 | 3.49 | 2.45 | 6.52 | 5.18 | 5.53  | 4.83  | 5.82  | 1.72 | 3.01 |
|               | Coil   | 8.08                                                                                       | 0.90 | 8.20 | 4.50 | 2.37 | 11.47 | 2.05 | 2.85  | 5.17  | 6.28 | 2.21 | 7.17 | 8.03 | 4.64 | 3.82 | 7.67  | 6.61  | 4.16  | 1.26 | 2.56 |
|               | Strand | 6.83                                                                                       | 0.70 | 2.79 | 3.44 | 5.41 | 3.85  | 1.65 | 9.48  | 11.13 | 4.07 | 2.48 | 3.09 | 1.49 | 3.75 | 4.38 | 5.44  | 7.83  | 14.42 | 2.25 | 5.51 |

| Average Cost  |        | Filtered Database |         | Neural Networks |         | Unfiltered Database† |         |
|---------------|--------|-------------------|---------|-----------------|---------|----------------------|---------|
|               |        | ATPs/aa           | % total | ATPs/aa         | % total | ATPs/aa              | % total |
| Overall       | Helix  | 23.904            | 39.37   | 24.017          | 41.21   | 23.608               | 32.90   |
|               | Coil   | 21.420            | 43.41   | 20.871          | 41.63   | 20.902               | 46.59   |
|               | Strand | 26.792            | 17.23   | 27.607          | 17.16   | 26.463               | 20.50   |
| Cytoplasm     | Helix  | 23.936            | 40.22   | 24.055          | 42.30   | ND                   | ND      |
|               | Coil   | 21.490            | 42.98   | 20.949          | 41.08   | ND                   | ND      |
|               | Strand | 26.844            | 16.80   | 27.627          | 16.63   | ND                   | ND      |
| Extracellular | Helix  | 21.797            | 33.45   | 21.746          | 32.81   | 21.831               | 33.41   |
|               | Coil   | 18.255            | 43.44   | 17.875          | 43.37   | 18.188               | 43.10   |
|               | Strand | 23.623            | 23.11   | 24.320          | 23.82   | 23.616               | 23.49   |
| Periplasm     | Helix  | 23.679            | 32.67   | 23.708          | 32.68   | 23.685               | 32.68   |
|               | Coil   | 21.019            | 46.88   | 20.426          | 46.09   | 21.009               | 46.09   |
|               | Strand | 26.599            | 20.45   | 27.638          | 21.22   | 26.604               | 21.22   |

| Percent Cost of |        | vs Cytoplasmic |        | vs Overall |        |
|-----------------|--------|----------------|--------|------------|--------|
|                 |        | Filtered       | NN     | Filtered   | NN     |
| Extracellular   | Helix  | 91.06          | 90.40  | 91.19      | 90.55  |
|                 | Coil   | 84.94          | 85.33  | 85.22      | 85.64  |
|                 | Strand | 88.00          | 88.03  | 88.17      | 88.09  |
| Periplasm       | Helix  | 98.93          | 98.56  | 99.06      | 98.71  |
|                 | Coil   | 97.81          | 97.50  | 98.13      | 97.87  |
|                 | Strand | 99.09          | 100.04 | 99.28      | 100.11 |

**Notes:** Values on this page are based on the total amino acids in all of that secondary structure of every protein in that location. Values in the table on the page above are from averaging % secondary structure in each protein. ND – not done. NN – Neural Networks.

† Overall contains only data from Periplasmic and Extracellular proteins

**Table S22B: Effects of protein structure on ASC in *P. syringae*.**

|                    | Mean values based on per protein amounts (unweighted for length) |         |         |        |                   |       |       |                      |       |       |                      |       |       |
|--------------------|------------------------------------------------------------------|---------|---------|--------|-------------------|-------|-------|----------------------|-------|-------|----------------------|-------|-------|
|                    | Count                                                            | Mean    |         |        | Filtered Database |       |       | Neural Networks only |       |       | Unfiltered Database† |       |       |
|                    |                                                                  | Mass/aa | ATPs/aa | Length | %H                | %E    | %C    | %H                   | %E    | %C    | %H                   | %E    | %C    |
| Overall            | 2167                                                             | 110.72  | 22.89   | 327.13 | 40.80             | 16.50 | 42.70 | 43.41                | 15.98 | 40.61 | 36.02                | 15.88 | 48.10 |
| Cytoplasmic        | 1973                                                             | 110.98  | 22.96   | 317.70 | 41.28             | 16.56 | 42.16 | 44.13                | 15.90 | 39.97 | ND                   | ND    | ND    |
| Periplasmic        | 110                                                              | 108.72  | 22.65   | 414.95 | 36.86             | 18.37 | 44.78 | 37.22                | 17.86 | 44.92 | 36.88                | 18.36 | 44.75 |
| Extracellular      | 84                                                               | 107.30  | 21.58   | 433.73 | 34.68             | 12.64 | 52.67 | 34.60                | 15.37 | 50.04 | 34.88                | 12.62 | 52.49 |
| HOPS&Helpers       | 51                                                               | 107.68  | 21.48   | 437.31 | 41.31             | 8.03  | 50.65 | 38.23                | 10.89 | 50.88 | 41.57                | 8.03  | 50.40 |
| Extracellular-HOPS | 33                                                               | 106.70  | 21.74   | 428.18 | 24.43             | 19.77 | 55.80 | 28.98                | 22.28 | 48.74 | 24.54                | 19.73 | 55.73 |

**Linear Correlation**

| vs. ASC (ATPs/aa)  | Filtered Database |                 |         |                 |         |                 | Neural Networks only |                 |         |                 |         |                 | Unfiltered Database† |         |         |         |         |         |
|--------------------|-------------------|-----------------|---------|-----------------|---------|-----------------|----------------------|-----------------|---------|-----------------|---------|-----------------|----------------------|---------|---------|---------|---------|---------|
|                    | %H                |                 | %E      |                 | %C      |                 | %H                   |                 | %E      |                 | %C      |                 | %H                   |         | %E      |         | %C      |         |
|                    | R                 | P value         | R       | P value         | R       | P value         | R                    | P value         | R       | P value         | R       | P value         | R                    | P value | R       | P value | R       | P value |
| Overall            | -0.1329           | <b>5.21E-10</b> | 0.1340  | <b>3.84E-10</b> | 0.0825  | <b>0.0001</b>   | -0.1055              | <b>8.57E-07</b> | 0.1363  | <b>1.90E-10</b> | 0.0376  | <b>7.98E-02</b> | 0.0196               | 0.3616  | 0.0071  | 0.7421  | -0.0331 | 0.1239  |
| Cytoplasmic        | -0.1717           | <b>1.60E-14</b> | 0.1259  | <b>2.04E-08</b> | 0.1605  | <b>7.33E-13</b> | -0.1484              | <b>3.45E-11</b> | 0.1432  | <b>1.64E-10</b> | 0.1069  | <b>1.96E-06</b> | ND                   | ND      | ND      | ND      | ND      | ND      |
| Periplasmic        | 0.0346            | 0.7196          | -0.1271 | 0.1858          | 0.0619  | 0.5205          | -0.0466              | 0.6290          | -0.0256 | 0.7909          | 0.1126  | 0.2416          | 0.0275               | 0.7758  | -0.1280 | 0.1828  | 0.0707  | 0.4628  |
| Extracellular      | -0.0908           | 0.4116          | 0.1980  | 0.0710          | -0.0434 | 0.6949          | -0.1792              | 0.1029          | 0.1871  | 0.0884          | 0.0705  | 0.5238          | -0.1008              | 0.3615  | 0.2057  | 0.0605  | -0.0362 | 0.7435  |
| HOPS&Helpers       | 0.1766            | 0.2152          | 0.2297  | 0.1049          | -0.3477 | 0.0124          | 0.0621               | 0.6650          | 0.1996  | 0.1603          | -0.2331 | 0.0998          | 0.1668               | 0.2420  | 0.2245  | 0.1132  | -0.3377 | 0.0154  |
| Extracellular-HOPS | -0.2626           | 0.1398          | 0.1538  | 0.3929          | 0.2212  | 0.2161          | -0.3455              | 0.0489          | 0.1440  | 0.4241          | 0.4587  | <b>0.0073</b>   | -0.2704              | 0.1280  | 0.1713  | 0.3405  | 0.2178  | 0.2235  |

Notes: ND - Not Done **BOLD**: P < 0.01

† Overall contains only data from Periplasmic and Extracellular proteins

**Comparing Protein Secondary Structure between Locations**

| vs Cytoplasmic         | Filtered Database |              |              |              | Neural Networks Only |              |              |              |
|------------------------|-------------------|--------------|--------------|--------------|----------------------|--------------|--------------|--------------|
|                        | Student t*        |              | Mann Whitney |              | Student t*           |              | Mann Whitney |              |
|                        | T value           | P value      | Z            | P value      | T value              | P value      | Z            | P value      |
| H Periplasmic          | 3.510             | 6.21E-04     | 2.538        | 1.12E-02     | 6.302                | 4.22E-09     | 5.249        | 1.53E-07     |
| E Periplasmic          | 2.356             | 0.020        | 2.126        | 0.034        | 2.682                | 8.29E-03     | 2.705        | 0.007        |
| C Periplasmic          | 3.046             | 0.003        | 2.243        | 0.025        | 7.983                | 6.56E-13     | 6.670        | 2.55E-11     |
| H Extracellular        | 3.410             | 0.001        | 2.721        | 0.007        | 6.154                | 2.00E-08     | 5.509        | 3.60E-08     |
| E Extracellular        | 3.328             | 0.001        | 4.377        | 1.20E-05     | 0.478                | <b>0.634</b> | 1.436        | <b>0.151</b> |
| C Extracellular        | 8.029             | 4.32E-12     | 8.232        | 2.22E-16     | 10.689               | 1.23E-17     | 9.724        | 2.37E-22     |
| H HOPs                 | 0.017             | <b>0.987</b> | 0.547        | <b>0.584</b> | 3.629                | 6.31E-04     | 3.075        | 0.002        |
| E HOPs                 | 6.334             | 2.93E-10     | 6.580        | 4.70E-11     | 5.447                | 1.23E-06     | 4.499        | 6.83E-06     |
| C HOPs                 | 5.469             | 1.31E-06     | 5.495        | 3.92E-08     | 9.032                | 3.10E-12     | 8.055        | 7.93E-16     |
| H Extracellular - HOPs | 5.417             | 5.38E-06     | 5.079        | 3.80E-07     | 5.528                | 3.88E-06     | 5.061        | 4.18E-07     |
| E Extracellular - HOPs | 1.508             | <b>0.141</b> | 1.146        | <b>0.252</b> | 3.337                | 0.002        | 5.652        | 1.59E-08     |
| C Extracellular - HOPs | 8.648             | 1.05E-17     | 6.438        | 1.21E-10     | 5.988                | 1.00E-06     | 3.297        | 0.001        |

Notes: Comparisons are versus same % secondary structure in cytoplasmic proteins

\* Assumes unequal variance, two tailed. **BOLD** – P > 0.01. H-Helix, E-Strand, C-Coil.

**Table S22B: Effects of protein structure on ASC in *P. syringae* (continued).**

|                      |        | Filtered Database (Percent of all amino acids in the Secondary Structure of each location) |      |      |      |      |       |      |       |       |      |      |      |      |      |      |       |      |       |      |      |
|----------------------|--------|--------------------------------------------------------------------------------------------|------|------|------|------|-------|------|-------|-------|------|------|------|------|------|------|-------|------|-------|------|------|
|                      |        | %A                                                                                         | %C   | %D   | %E   | %F   | %G    | %H   | %I    | %K    | %L   | %M   | %N   | %P   | %Q   | %R   | %S    | %T   | %V    | %W   | %Y   |
| Overall              | Helix  | 13.61                                                                                      | 0.95 | 4.98 | 8.44 | 3.35 | 3.57  | 2.34 | 5.04  | 13.96 | 4.51 | 2.45 | 2.31 | 2.33 | 5.65 | 8.14 | 4.68  | 3.83 | 6.17  | 1.26 | 2.45 |
|                      | Coil   | 8.36                                                                                       | 1.13 | 8.12 | 5.61 | 2.72 | 12.52 | 2.87 | 2.96  | 6.79  | 4.11 | 2.22 | 4.40 | 8.32 | 3.92 | 5.91 | 7.25  | 5.46 | 4.57  | 0.84 | 1.95 |
|                      | Strand | 6.76                                                                                       | 1.67 | 2.75 | 4.47 | 5.59 | 3.61  | 2.54 | 10.66 | 13.58 | 3.02 | 2.25 | 1.64 | 1.47 | 3.09 | 5.83 | 4.17  | 5.41 | 16.19 | 1.56 | 3.75 |
| Cytoplasm            | Helix  | 13.46                                                                                      | 1.00 | 4.96 | 8.67 | 3.35 | 3.54  | 2.41 | 5.10  | 14.11 | 4.29 | 2.43 | 2.23 | 2.31 | 5.60 | 8.42 | 4.51  | 3.73 | 6.19  | 1.25 | 2.45 |
|                      | Coil   | 8.11                                                                                       | 1.23 | 8.10 | 5.82 | 2.76 | 12.57 | 3.01 | 3.02  | 6.96  | 3.95 | 2.28 | 4.17 | 8.30 | 3.85 | 6.19 | 7.02  | 5.33 | 4.57  | 0.83 | 1.94 |
|                      | Strand | 6.70                                                                                       | 1.78 | 2.76 | 4.58 | 5.46 | 3.57  | 2.61 | 10.82 | 13.78 | 2.90 | 2.21 | 1.54 | 1.46 | 3.04 | 6.00 | 4.07  | 5.17 | 16.36 | 1.52 | 3.67 |
| Periplasm            | Helix  | 15.45                                                                                      | 0.50 | 5.28 | 6.46 | 3.52 | 3.89  | 1.33 | 4.58  | 12.51 | 7.11 | 2.53 | 2.78 | 2.85 | 5.73 | 5.35 | 5.41  | 4.38 | 5.97  | 1.66 | 2.72 |
|                      | Coil   | 9.84                                                                                       | 0.51 | 8.53 | 4.59 | 2.79 | 11.77 | 1.80 | 2.57  | 5.69  | 6.08 | 2.10 | 5.25 | 8.97 | 4.45 | 3.90 | 7.46  | 5.70 | 4.62  | 1.03 | 2.36 |
|                      | Strand | 7.52                                                                                       | 0.83 | 2.39 | 3.93 | 6.49 | 4.25  | 1.57 | 9.12  | 11.48 | 4.38 | 2.69 | 2.28 | 1.86 | 3.37 | 4.40 | 4.79  | 6.78 | 15.60 | 2.15 | 4.12 |
| Extracellular        | Helix  | 14.37                                                                                      | 0.51 | 4.89 | 6.24 | 3.03 | 3.83  | 2.30 | 4.38  | 12.64 | 5.71 | 2.76 | 3.30 | 1.96 | 6.49 | 6.03 | 7.31  | 5.20 | 5.99  | 0.94 | 2.09 |
|                      | Coil   | 10.06                                                                                      | 0.42 | 7.90 | 3.87 | 2.10 | 12.70 | 2.18 | 2.54  | 5.69  | 4.17 | 1.57 | 6.47 | 7.86 | 4.16 | 4.31 | 10.18 | 6.95 | 4.45  | 0.70 | 1.72 |
|                      | Strand | 6.75                                                                                       | 0.78 | 3.09 | 3.05 | 6.84 | 3.38  | 2.51 | 9.74  | 12.70 | 3.40 | 2.40 | 2.73 | 0.93 | 3.59 | 4.59 | 5.37  | 8.31 | 13.46 | 1.43 | 4.96 |
| HOPS                 | Helix  | 13.97                                                                                      | 0.49 | 4.97 | 6.52 | 2.98 | 3.65  | 2.62 | 4.07  | 12.63 | 6.12 | 3.02 | 2.98 | 2.13 | 6.50 | 6.49 | 7.27  | 4.77 | 6.00  | 0.80 | 2.04 |
|                      | Coil   | 9.60                                                                                       | 0.35 | 7.01 | 4.08 | 1.98 | 12.14 | 2.63 | 2.72  | 5.70  | 4.48 | 1.66 | 6.44 | 8.84 | 4.36 | 4.78 | 10.92 | 6.31 | 4.14  | 0.53 | 1.33 |
|                      | Strand | 7.20                                                                                       | 0.93 | 2.24 | 3.27 | 7.14 | 3.22  | 3.65 | 9.05  | 13.30 | 3.65 | 2.34 | 2.45 | 0.93 | 3.71 | 6.27 | 4.85  | 6.54 | 14.50 | 0.98 | 3.76 |
| Extracellular - HOPS | Helix  | 15.60                                                                                      | 0.56 | 4.66 | 5.42 | 3.17 | 4.40  | 1.35 | 5.32  | 12.69 | 4.49 | 1.98 | 4.23 | 1.45 | 6.48 | 4.66 | 7.44  | 6.48 | 5.98  | 1.39 | 2.25 |
|                      | Coil   | 10.69                                                                                      | 0.52 | 9.13 | 3.58 | 2.27 | 13.48 | 1.56 | 2.28  | 5.66  | 3.75 | 1.44 | 6.52 | 6.52 | 3.88 | 3.66 | 9.17  | 7.82 | 4.87  | 0.94 | 2.26 |
|                      | Strand | 6.46                                                                                       | 0.68 | 3.66 | 2.91 | 6.64 | 3.48  | 1.76 | 10.19 | 12.31 | 3.23 | 2.44 | 2.91 | 0.93 | 3.52 | 3.48 | 5.71  | 9.47 | 12.77 | 1.72 | 5.74 |

| Average Cost         |        | Filtered Database |         | Neural Networks |         | Unfiltered Database† |         |
|----------------------|--------|-------------------|---------|-----------------|---------|----------------------|---------|
|                      |        | ATPs/aa           | % total | ATPs/aa         | % total | ATPs/aa              | % total |
| Overall              | Helix  | 23.549            | 40.58   | 23.691          | 43.08   | 22.993               | 34.90   |
|                      | Coil   | 21.138            | 43.49   | 20.640          | 41.58   | 20.359               | 50.03   |
|                      | Strand | 26.629            | 15.93   | 27.397          | 15.34   | 26.658               | 15.07   |
| Cytoplasm            | Helix  | 23.610            | 41.35   | 23.752          | 44.02   | ND                   | ND      |
|                      | Coil   | 21.258            | 42.62   | 20.751          | 40.72   | ND                   | ND      |
|                      | Strand | 26.625            | 16.03   | 27.429          | 15.26   | ND                   | ND      |
| Periplasm            | Helix  | 23.282            | 35.95   | 23.500          | 36.97   | 23.287               | 35.98   |
|                      | Coil   | 20.852            | 46.93   | 20.373          | 46.46   | 20.859               | 46.96   |
|                      | Strand | 26.590            | 17.12   | 27.487          | 16.57   | 26.577               | 17.06   |
| Extracellular        | Helix  | 22.601            | 33.15   | 22.626          | 34.584  | 22.597               | 33.55   |
|                      | Coil   | 19.821            | 54.17   | 19.409          | 50.295  | 19.813               | 53.87   |
|                      | Strand | 26.785            | 12.68   | 26.713          | 15.121  | 26.796               | 12.58   |
| HOPS                 | Helix  | 22.664            | 40.58   | 22.583          | 39.21   | 22.662               | 41.20   |
|                      | Coil   | 19.819            | 51.19   | 19.657          | 50.25   | 19.809               | 50.68   |
|                      | Strand | 26.748            | 8.22    | 26.667          | 10.54   | 26.691               | 8.12    |
| Extracellular - HOPS | Helix  | 22.413            | 21.42   | 22.724          | 27.28   | 22.402               | 21.48   |
|                      | Coil   | 19.824            | 58.86   | 19.018          | 50.37   | 19.819               | 58.90   |
|                      | Strand | 26.810            | 19.72   | 26.746          | 22.36   | 26.864               | 19.62   |

| Percent Cost of      |        | vs Cytoplasmic |        | vs Overall |        |
|----------------------|--------|----------------|--------|------------|--------|
|                      |        | Filtered       | NN     | Filtered   | NN     |
| Periplasm            | Helix  | 98.61          | 98.94  | 98.87      | 99.19  |
|                      | Coil   | 98.09          | 98.18  | 98.65      | 98.71  |
|                      | Strand | 99.87          | 100.21 | 99.85      | 100.33 |
| Extracellular        | Helix  | 95.73          | 95.26  | 95.97      | 95.50  |
|                      | Coil   | 93.24          | 93.53  | 93.77      | 94.03  |
|                      | Strand | 100.60         | 97.39  | 100.59     | 97.50  |
| HOPS                 | Helix  | 95.99          | 95.08  | 96.24      | 95.32  |
|                      | Coil   | 93.23          | 94.73  | 93.76      | 95.24  |
|                      | Strand | 100.46         | 97.22  | 100.45     | 97.34  |
| Extracellular - HOPS | Helix  | 94.93          | 95.67  | 95.18      | 95.92  |
|                      | Coil   | 93.25          | 91.65  | 93.78      | 92.14  |
|                      | Strand | 100.69         | 97.51  | 100.68     | 97.62  |

**Notes:** Values on this page are based on the total amino acids in all of that secondary structure of every protein in that location. Values in the table on the page above are from averaging % secondary structure in each protein. ND – not done. NN – Neural Networks.

† Overall contains only data from Periplasmic and Extracellular proteins

**Table S23: Disorder prediction and ASC in nonmembrane proteins of *E. coli* and *P. syringae*.**

*E. coli*

|               | Mean values based on per protein amounts (unweighted for length) |         |         |        |              |                 |
|---------------|------------------------------------------------------------------|---------|---------|--------|--------------|-----------------|
|               | Count                                                            | Mass/aa | ATPs/aa | Length | %<br>Ordered | %<br>Disordered |
| Overall       | 3212                                                             | 111.38  | 23.26   | 297.75 | 94.25        | 5.75            |
| Cytoplasmic   | 2859                                                             | 111.61  | 23.32   | 296.47 | 94.50        | 5.50            |
| Periplasmic   | 337                                                              | 109.72  | 22.85   | 309.42 | 92.39        | 7.61            |
| Extracellular | 16                                                               | 104.90  | 20.65   | 280.44 | 88.81        | 11.19           |

*E. coli*

|               | Linear Correlation of ASC (ATPs/aa) and... |               |              |               |
|---------------|--------------------------------------------|---------------|--------------|---------------|
|               | % Ordered                                  |               | % Disordered |               |
|               | R                                          | P value       | R            | P value       |
| Overall       | 0.1122                                     | 1.81E-10      | -0.1122      | 1.81E-10      |
| Cytoplasmic   | 0.0719                                     | 1.20E-04      | -0.0719      | 1.20E-04      |
| Periplasmic   | 0.2597                                     | 1.35E-06      | -0.2597      | 1.35E-06      |
| Extracellular | 0.3342                                     | <b>0.2058</b> | -0.3342      | <b>0.2058</b> |

*P. syringae*

|                    | Mean values based on per protein amounts (unweighted for length) |         |         |        |              |                 |
|--------------------|------------------------------------------------------------------|---------|---------|--------|--------------|-----------------|
|                    | Count                                                            | Mass/aa | ATPs/aa | Length | %<br>Ordered | %<br>Disordered |
| Overall            | 2167                                                             | 110.72  | 22.89   | 327.13 | 93.70        | 6.30            |
| Cytoplasmic        | 1973                                                             | 110.98  | 22.96   | 317.70 | 94.07        | 5.93            |
| Periplasmic        | 110                                                              | 108.72  | 22.65   | 414.95 | 95.62        | 4.38            |
| Extracellular      | 84                                                               | 107.30  | 21.58   | 433.73 | 82.63        | 17.37           |
| HOPS&Helpers†      | 51                                                               | 107.68  | 21.48   | 437.31 | 77.13        | 22.87           |
| Extracellular-HOPS | 33                                                               | 106.70  | 21.74   | 428.18 | 91.14        | 8.86            |

*P. syringae*

|                    | Linear Correlation of ASC (ATPs/aa) and... |               |              |               |
|--------------------|--------------------------------------------|---------------|--------------|---------------|
|                    | % Ordered                                  |               | % Disordered |               |
|                    | R                                          | P value       | R            | P value       |
| Overall            | 0.1762                                     | 1.43E-16      | -0.1762      | 1.43E-16      |
| Cytoplasmic        | 0.0648                                     | 0.0040        | -0.0648      | 0.0040        |
| Periplasmic        | 0.4273                                     | 3.23E-06      | -0.4273      | 3.23E-06      |
| Extracellular      | 0.4987                                     | 1.38E-06      | -0.4987      | 1.38E-06      |
| HOPS&Helpers†      | 0.5896                                     | 5.29E-06      | -0.5896      | 5.29E-06      |
| Extracellular-HOPS | 0.4271                                     | <b>0.0132</b> | -0.4271      | <b>0.0132</b> |

*E. coli*

|                | Comparing composition (Filtered Database) |              |              |              |
|----------------|-------------------------------------------|--------------|--------------|--------------|
|                | Student t*                                |              | Mann Whitney |              |
| vs Cytoplasmic | T value                                   | P value      | Z            | P value      |
| Periplasmic    |                                           |              |              |              |
| % Ordered      | 3.518                                     | 4.87E-04     | 4.337        | 1.44E-05     |
| % Disordered   | 3.518                                     | 4.87E-04     | 4.337        | 1.45E-05     |
| Extracellular  |                                           |              |              |              |
| % Ordered      | 1.020                                     | <b>0.324</b> | 0.099        | <b>0.921</b> |
| % Disordered   | 1.020                                     | <b>0.324</b> | 0.099        | <b>0.921</b> |

*P. syringae*

|                      | Comparing composition (Filtered database) |               |              |               |
|----------------------|-------------------------------------------|---------------|--------------|---------------|
|                      | Student t*                                |               | Mann Whitney |               |
| vs Cytoplasmic       | T value                                   | P value       | Z            | P value       |
| Periplasmic          |                                           |               |              |               |
| % Ordered            | 1.865                                     | <b>0.0647</b> | 3.989        | 6.62E-05      |
| % Disordered         | 1.865                                     | <b>0.0647</b> | 3.990        | 6.62E-05      |
| Extracellular        |                                           |               |              |               |
| % Ordered            | 5.814                                     | 1.07E-07      | 6.836        | 8.15E-12      |
| % Disordered         | 5.814                                     | 1.07E-07      | 6.836        | 8.16E-12      |
| HOPS†                |                                           |               |              |               |
| % Ordered            | 8.029                                     | 1.31E-10      | 9.615        | 6.93E-22      |
| % Disordered         | 8.029                                     | 1.31E-10      | 9.615        | 6.93E-22      |
| Extracellular - HOPS |                                           |               |              |               |
| % Ordered            | 0.884                                     | <b>0.3832</b> | 0.962        | <b>0.3360</b> |
| % Disordered         | 0.884                                     | <b>0.3832</b> | 0.962        | <b>0.3358</b> |

**Notes:** BOLD – P > 0.01 \* Assumes unequal variance, two tailed.

† The N terminus (non cleaved signal sequence) of Type III effectors is typically disordered (29); HOPS have higher % disorder in the rest of their proteins. Removing the first 30 aa from the HOP proteins changed the % of ordered and disordered regions to 81.36% and 18.64% respectively.



**Table S23: Disorder prediction and ASC in nonmembrane proteins of *E. coli* and *P. syringae* (continued).**

**Filtered Database (Percent of all amino acids in the (dis)ordered region of each location)**

| <i>E. coli</i>       |            | %A    | %C   | %D   | %E   | %F   | %G   | %H   | %I   | %K    | %L   | %M   | %N   | %P    | %Q   | %R   | %S    | %T    | %V   | %W   | %Y   | ASC    | % total |
|----------------------|------------|-------|------|------|------|------|------|------|------|-------|------|------|------|-------|------|------|-------|-------|------|------|------|--------|---------|
| Overall              | Disordered | 9.82  | 0.44 | 4.96 | 7.93 | 1.42 | 5.54 | 2.43 | 2.71 | 5.29  | 8.16 | 6.98 | 4.77 | 5.78  | 6.87 | 7.14 | 8.17  | 5.95  | 4.17 | 0.35 | 1.12 | 21.326 | 4.29    |
|                      | Ordered    | 9.36  | 1.32 | 5.71 | 6.48 | 3.58 | 7.20 | 2.55 | 5.75 | 10.20 | 4.58 | 2.45 | 3.99 | 4.45  | 4.55 | 5.87 | 5.47  | 5.29  | 6.91 | 1.39 | 2.90 | 23.413 | 95.71   |
| Cytoplasm            | Disordered | 9.72  | 0.47 | 4.97 | 8.35 | 1.37 | 5.46 | 2.49 | 2.75 | 5.23  | 7.93 | 6.95 | 4.65 | 5.77  | 6.77 | 7.53 | 8.08  | 5.81  | 4.20 | 0.35 | 1.14 | 21.344 | 4.07    |
|                      | Ordered    | 9.30  | 1.38 | 5.67 | 6.71 | 3.59 | 7.18 | 2.66 | 5.83 | 10.34 | 4.45 | 2.48 | 3.83 | 4.42  | 4.50 | 6.08 | 5.34  | 5.15  | 6.90 | 1.36 | 2.83 | 23.459 | 95.93   |
| Periplasm            | Disordered | 10.23 | 0.32 | 4.82 | 5.75 | 1.74 | 6.11 | 2.21 | 2.44 | 5.41  | 9.71 | 7.39 | 5.48 | 5.70  | 7.34 | 5.30 | 8.42  | 6.23  | 3.95 | 0.35 | 1.11 | 21.338 | 5.78    |
|                      | Ordered    | 9.81  | 0.88 | 6.03 | 4.69 | 3.54 | 7.35 | 1.68 | 5.07 | 9.08  | 5.66 | 2.22 | 5.11 | 4.82  | 4.93 | 4.32 | 6.40  | 6.28  | 6.97 | 1.69 | 3.45 | 23.133 | 94.22   |
| Extracellular        | Disordered | 11.31 | 0.23 | 6.11 | 4.52 | 1.36 | 3.62 | 0.45 | 2.49 | 8.14  | 5.20 | 4.07 | 4.30 | 7.92  | 7.47 | 2.26 | 11.76 | 12.90 | 5.20 | 0.45 | 0.23 | 19.763 | 9.85    |
|                      | Ordered    | 11.79 | 0.40 | 6.08 | 2.89 | 2.74 | 8.33 | 0.59 | 5.22 | 8.68  | 4.23 | 1.31 | 7.54 | 2.08  | 6.38 | 2.30 | 9.02  | 10.14 | 7.05 | 0.54 | 2.69 | 20.780 | 90.15   |
| <i>P. syringae</i>   |            |       |      |      |      |      |      |      |      |       |      |      |      |       |      |      |       |       |      |      |      |        |         |
| Overall              | Disordered | 11.95 | 0.40 | 5.91 | 7.22 | 1.39 | 6.17 | 2.21 | 2.42 | 5.93  | 5.39 | 5.23 | 3.58 | 8.27  | 5.83 | 7.63 | 9.08  | 5.47  | 4.84 | 0.26 | 0.82 | 20.540 | 5.73    |
|                      | Ordered    | 10.13 | 1.18 | 5.99 | 6.54 | 3.56 | 7.55 | 2.63 | 5.19 | 11.07 | 4.02 | 2.14 | 3.08 | 4.58  | 4.41 | 6.75 | 5.51  | 4.75  | 7.20 | 1.18 | 2.54 | 23.140 | 94.27   |
| Cytoplasm            | Disordered | 11.47 | 0.48 | 6.00 | 7.78 | 1.40 | 5.96 | 2.30 | 2.39 | 6.11  | 5.31 | 5.92 | 3.39 | 7.91  | 5.51 | 8.25 | 8.49  | 5.37  | 4.92 | 0.27 | 0.78 | 20.811 | 5.00    |
|                      | Ordered    | 10.02 | 1.26 | 5.94 | 6.75 | 3.55 | 7.47 | 2.72 | 5.27 | 11.27 | 3.85 | 2.14 | 2.93 | 4.56  | 4.39 | 7.02 | 5.35  | 4.60  | 7.25 | 1.16 | 2.52 | 23.211 | 95.00   |
| Periplasm            | Disordered | 15.14 | 0.12 | 6.11 | 6.35 | 1.72 | 6.17 | 1.17 | 2.56 | 5.39  | 6.98 | 3.94 | 2.83 | 10.90 | 7.34 | 4.85 | 7.28  | 4.73  | 5.18 | 0.21 | 1.02 | 20.090 | 7.28    |
|                      | Ordered    | 11.17 | 0.60 | 6.33 | 5.06 | 3.84 | 7.77 | 1.62 | 4.56 | 9.43  | 6.09 | 2.23 | 3.93 | 5.13  | 4.52 | 4.48 | 6.19  | 5.46  | 7.12 | 1.55 | 2.93 | 22.914 | 92.72   |
| Extracellular        | Disordered | 12.71 | 0.13 | 5.33 | 4.78 | 1.14 | 7.30 | 2.30 | 2.52 | 5.28  | 4.91 | 2.32 | 5.05 | 8.69  | 6.66 | 5.89 | 13.17 | 6.44  | 4.24 | 0.89 | 0.89 | 19.364 | 16.32   |
|                      | Ordered    | 10.75 | 0.56 | 6.48 | 4.51 | 3.38 | 8.83 | 2.25 | 4.36 | 9.58  | 4.52 | 2.02 | 4.92 | 4.31  | 4.51 | 4.72 | 7.73  | 6.56  | 6.47 | 1.00 | 2.52 | 22.067 | 83.68   |
| HOPS                 | Disordered | 12.03 | 0.14 | 4.85 | 4.94 | 1.12 | 7.76 | 2.52 | 2.62 | 5.24  | 4.90 | 2.03 | 4.96 | 9.04  | 6.82 | 6.24 | 13.35 | 6.40  | 3.90 | 0.28 | 0.85 | 19.417 | 22.76   |
|                      | Ordered    | 10.92 | 0.55 | 6.07 | 5.02 | 3.31 | 8.02 | 2.76 | 4.13 | 10.29 | 5.13 | 2.33 | 4.63 | 4.41  | 4.69 | 5.40 | 7.64  | 5.50  | 6.29 | 0.80 | 2.11 | 22.170 | 77.24   |
| Extracellular - HOPs | Disordered | 16.69 | 0.12 | 8.17 | 3.80 | 1.27 | 4.60 | 1.04 | 1.96 | 5.52  | 4.95 | 4.03 | 5.52 | 6.67  | 5.75 | 3.80 | 12.08 | 6.67  | 6.21 | 0.00 | 1.15 | 19.057 | 6.15    |
|                      | Ordered    | 10.53 | 0.59 | 7.02 | 3.85 | 3.46 | 9.89 | 1.59 | 4.66 | 8.67  | 3.73 | 1.61 | 5.30 | 4.18  | 4.28 | 3.84 | 7.86  | 7.93  | 6.70 | 1.27 | 3.06 | 21.933 | 93.85   |

| Percent Cost of |            | <i>E. coli</i> |            |
|-----------------|------------|----------------|------------|
|                 |            | vs Cytoplasmic | vs Overall |
| Periplasm       | Disordered | 99.98          | 100.06     |
|                 | Ordered    | 98.61          | 98.81      |
| Extracellular   | Disordered | 92.59          | 92.67      |
|                 | Ordered    | 88.58          | 88.76      |

| Percent Cost of      |            | <i>P. syringae</i> |            |
|----------------------|------------|--------------------|------------|
|                      |            | vs Cytoplasmic     | vs Overall |
| Periplasm            | Disordered | 96.54              | 97.81      |
|                      | Ordered    | 98.72              | 99.02      |
| Extracellular        | Disordered | 93.05              | 94.27      |
|                      | Ordered    | 95.07              | 95.36      |
| HOPS                 | Disordered | 93.30              | 94.53      |
|                      | Ordered    | 95.52              | 95.81      |
| Extracellular - HOPs | Disordered | 91.57              | 92.78      |
|                      | Ordered    | 94.49              | 94.78      |

**Notes:** Values on this page are based on the total amino acids in all the (dis)ordered region of every protein in that location. Values in the table on the page above are from averaging the % (dis)order in each protein.

**Table S24: Amino acid composition of extracellular flagellar subunits in endosymbionts and other *Gammaproteobacteria*.**

| Symbiont                                           | Protein Sequence | Insect Host                         |           | Presence of Amino Acid Pathway – Source (100, 111) |   |   |   |   |   |   |   |   |   |   |   |   |   |   |   |   |   |   |   |
|----------------------------------------------------|------------------|-------------------------------------|-----------|----------------------------------------------------|---|---|---|---|---|---|---|---|---|---|---|---|---|---|---|---|---|---|---|
|                                                    |                  | Name                                | Nutrition | A                                                  | R | N | D | C | E | Q | G | H | I | L | K | M | F | P | S | T | W | Y | V |
| <i>Wigglesworthia glossinidia</i> (4)              | PSORTDB          | <i>Glossina brevipalpis</i>         | blood     |                                                    |   |   | P |   | Y | Y | Y |   |   |   |   |   | P |   |   |   |   |   | P |
| <i>Sodalis glossinidius</i> str. 'morsitans' (100) | NCBI             | <i>Glossina morsitans morsitans</i> | blood     | Y                                                  | Y | Y | Y | Y | Y | Y | Y | Y | Y | Y | Y | Y | Y | Y | Y | Y | Y | Y | Y |
| <i>Buchnera aphidicola</i> str. APS (89)           | PSORTDB          | <i>Acyrtosiphon pisum</i>           | phloem    | Y                                                  |   |   | Y |   |   |   | Y | Y | Y | Y | Y |   |   | Y |   |   | Y | Y | Y |
| <i>Buchnera aphidicola</i> str. Sg (98)            | NCBI             | <i>Schizaphis graminum</i>          | phloem    | Y                                                  |   |   | Y |   |   |   | Y | Y | Y | Y | Y |   |   | Y |   |   | Y | Y | Y |

P=Some genes in pathway are present

|                          | Mean Protein Values |       |        |         |         |      |     |     |     |     |     |     |     |     |      |      |      |     |     |     |     |     |     |     |     |
|--------------------------|---------------------|-------|--------|---------|---------|------|-----|-----|-----|-----|-----|-----|-----|-----|------|------|------|-----|-----|-----|-----|-----|-----|-----|-----|
|                          | Proteins            | %GC   | Length | Mass/aa | ATPs/aa | %A   | %R  | %N  | %D  | %C  | %E  | %Q  | %G  | %H  | %I   | %L   | %K   | %M  | %F  | %P  | %S  | %T  | %W  | %Y  | %V  |
| <i>W. glossinidia</i>    | 611                 | 22.50 | 330.1  | 114.979 | 25.585  | 3.6  | 3.3 | 8.4 | 3.8 | 1.3 | 5.0 | 2.3 | 5.0 | 1.6 | 13.3 | 9.5  | 12.1 | 2.1 | 5.5 | 2.7 | 7.6 | 3.7 | 0.8 | 3.9 | 4.2 |
| <i>S. glossinidius</i>   | 2515                | 54.51 | 287.1  | 110.743 | 23.261  | 10.1 | 6.6 | 3.4 | 5.3 | 1.3 | 5.4 | 4.7 | 7.2 | 2.4 | 5.6  | 10.9 | 4.2  | 2.8 | 3.6 | 4.5 | 5.8 | 5.3 | 1.3 | 2.8 | 6.9 |
| <i>B. aphidicola</i> APS | 574                 | 26.35 | 328.0  | 114.303 | 25.027  | 4.5  | 4.0 | 7.1 | 4.1 | 1.2 | 5.4 | 3.2 | 5.4 | 2.1 | 11.7 | 9.8  | 10.3 | 2.3 | 5.0 | 2.9 | 7.2 | 4.6 | 0.9 | 3.5 | 4.9 |
| <i>B. aphidicola</i> SG  | 545                 | 25.00 | 326.2  | 114.531 | 25.192  | 4.4  | 3.9 | 7.2 | 4.0 | 1.2 | 5.4 | 3.0 | 5.3 | 2.0 | 11.8 | 9.8  | 11.0 | 2.2 | 5.3 | 2.9 | 7.0 | 4.4 | 0.8 | 3.5 | 4.8 |
| <i>E. coli</i> K-12      | 4333                | 50.80 | 312.5  | 111.005 | 23.555  | 9.4  | 5.6 | 3.9 | 5.0 | 1.3 | 5.8 | 4.4 | 7.1 | 2.3 | 6.1  | 10.6 | 4.7  | 3.0 | 3.9 | 4.3 | 5.8 | 5.4 | 1.5 | 2.8 | 7.1 |

| Amino Acids                             | A           | R   | N           | D          | C   | E           | Q          | G          | H          | I   | L           | K           | M   | F   | P          | S              | T              | W   | Y   | V          |             |
|-----------------------------------------|-------------|-----|-------------|------------|-----|-------------|------------|------------|------------|-----|-------------|-------------|-----|-----|------------|----------------|----------------|-----|-----|------------|-------------|
| %aa in highly expressed genes (85)      | ↑           | ↑   | ↓           |            | ↓   | ↑           |            | ↑          |            | ↓   | ↓           | ↑           |     | ↓   |            | ↓ <sup>†</sup> | ↑ <sup>†</sup> | ↓   | ↓   | ↑          |             |
| <b>Source of insect host nutrition</b>  |             |     |             |            |     |             |            |            |            |     |             |             |     |     |            |                |                |     |     |            | <b>BOLD</b> |
| <i>Vicia faba</i> phloem (molar %)(109) | <b>3</b>    | 0.6 | <b>68.7</b> | <b>3.4</b> |     | <b>3.7</b>  | <b>6.7</b> | 0.8        | <b>3.3</b> | 0.5 | 0.6         | 1           | 0.2 | 0.4 |            | <b>4.4</b>     | 1              | 0.2 | 0.5 | 1          |             |
| <i>Triticum aestivum</i> (>5mM)(84)     | Y           |     |             | Y          |     | Y           | Y          |            | Y*         | Y   | Y           | Y           |     | Y   |            | Y              | Y              |     |     | Y          |             |
| <i>Triticum aestivum</i> (>10mM)(84)    |             |     |             | Y          |     | Y           | Y          |            |            | Y   | Y           |             |     | Y   |            | Y              |                |     |     | Y          |             |
| Human whole blood (μM)(79)              | <b>325</b>  | nd  | 48          | 129        | nd  | <b>208</b>  | <b>528</b> | <b>234</b> | 58         | 51  | 114         | 79          | 19  | 47  | 184        | 118            | 124            | nd  | 63  | <b>213</b> |             |
| Human plasma (μM)(79)                   | <b>208</b>  | nd  | 15          | 7          | nd  | 35          | <b>344</b> | <b>105</b> | 40         | 37  | 80          | 69          | 15  | 34  | <b>130</b> | 64             | 82             | nd  | 41  | <b>146</b> |             |
| Human serum (μM)(80)                    | <b>351</b>  | 91  | 59          | 11         | 10  | 99          | <b>748</b> | <b>325</b> | 88         | 89  | <b>135</b>  | <b>187</b>  | 8   | 63  | <b>254</b> | <b>155</b>     | <b>186</b>     | 73  | 70  | <b>274</b> |             |
| Mature human serum albumin (%aa)        | <b>10.6</b> | 4.1 | 2.9         | 6.2        | 6.0 | <b>10.6</b> | 3.4        | 2.1        | 2.7        | 1.4 | <b>10.4</b> | <b>10.1</b> | 1.0 | 5.3 | 4.1        | 4.1            | 4.8            | 0.2 | 3.1 | 7.0        |             |
| <b>%aa in ext. flagellar prot. **</b>   |             |     |             |            |     |             |            |            |            |     |             |             |     |     |            |                |                |     |     |            |             |
| <i>Buchnera aphidicola</i> str. APS     | ↓           |     | ↑           |            | ↑   |             |            | ↓          | ↑          | ↑   |             | ↑           |     |     |            |                |                | ↓   |     | ↓          |             |
| <i>Buchnera aphidicola</i> str. Sg      | ↓           |     | ↑           |            | ↑   |             |            | ↓          | ↑          | ↑   |             | ↑           |     |     | ↓          |                | ↓              |     |     | ↓          |             |
| <i>Wigglesworthia glossinidia</i>       | ↓           |     | ↑           | ↓          |     | ↑           | ↓          | ↓          | ↑          | ↑   |             | ↑           | ↓   | ↑   | ↓          |                | ↓              |     | ↑   | ↓          |             |

**Notes:** Amino acid percents are on a per protein basis. The percent amino acid composition of each protein were averaged; they are unweighted for length.

Selected papers related to amino acid composition in phloem sap – (3, 24, 83, 84, 109), in human blood – (68, 69, 79, 80)

**Legend:** nd – not done; † only in *W. glossinidia*; \* Histidine in stylus from *B. aphidicola* str. Sg feeding on *T. aestivum* is ~4.9mM (Adobe Photoshop used to measure graph in (84))

\*\* Trend in amino acid composition in at least 3 of 4 (*Buchnera*) or 4 of 7 (*Wigglesworthia*) in flagellar proteins compared to other *Gammaproteobacteria* (see continued table below)

**Table S24: Amino acid composition of extracellular flagellar subunits in endosymbionts and other *Gammaproteobacteria* (continued).**

|      |                          | Homologs |       | Mean Values |         | Economic Rank ** |          |            |            |             |            |            |            |            |            |            |             |      |             |            |            |            |      |            |            |            |            |  |  |  |  |
|------|--------------------------|----------|-------|-------------|---------|------------------|----------|------------|------------|-------------|------------|------------|------------|------------|------------|------------|-------------|------|-------------|------------|------------|------------|------|------------|------------|------------|------------|--|--|--|--|
|      |                          | Total    | Size* | Mass/aa     | ATPs/aa | Organism         | Homologs | %A         | %R         | %N          | %D         | %C         | %E         | %Q         | %G         | %H         | %I          | %L   | %K          | %M         | %F         | %P         | %S   | %T         | %W         | %Y         | %V         |  |  |  |  |
| FliC | <i>γ</i> Proteobacteria  | 544      | 516   | 104.682     | 19.662  |                  |          | 13.1       | 3.8        | 8.2         | 6.5        | 0.0        | 4.5        | 6.5        | 8.0        | 0.4        | 5.8         | 8.5  | 4.1         | 2.5        | 2.0        | 0.7        | 10.0 | 8.7        | 0.1        | 1.1        | 5.5        |  |  |  |  |
|      | <i>W. glossinidia</i>    |          |       | 109.134     | 21.100  | 4/611            | 514/516  | 8.8        | 4.0        | 8.8         | 6.7        | 0.0        | 6.2        | 5.5        | 5.2        | 0.5        | 9.5         | 8.3  | 7.1         | 1.4        | 2.1        | 1.0        | 11.9 | 4.8        | 0.0        | <b>2.6</b> | 5.7        |  |  |  |  |
|      | <i>S. glossinidius</i>   |          |       | 106.962     | 20.633  | 48/2515          | 489/516  | 10.7       | 3.3        | 6.9         | 6.7        | 0.0        | 6.9        | 5.7        | 8.1        | <b>0.0</b> | 9.1         | 7.2  | 7.4         | <b>1.0</b> | 1.9        | 1.4        | 7.9  | 8.1        | 0.0        | 2.6        | 5.0        |  |  |  |  |
| FliD | <i>γ</i> Proteobacteria  | 284      | 277   | 104.682     | 19.662  |                  |          | 10.2       | 2.9        | 5.8         | 7.6        | 0.0        | 4.9        | 5.3        | 7.5        | 0.4        | 5.4         | 8.9  | 6.4         | 2.1        | 2.5        | 1.8        | 10.3 | 10.2       | 0.2        | 1.9        | 5.8        |  |  |  |  |
|      | <i>W. glossinidia</i>    |          |       | 116.578     | 24.725  | 185/611          | 277/277  | <b>1.6</b> | 2.6        | <b>13.5</b> | 4.2        | <b>0.4</b> | 7.9        | <b>2.0</b> | 4.0        | <b>1.0</b> | <b>12.1</b> | 9.7  | <b>15.8</b> | 1.6        | <b>5.3</b> | 1.6        | 8.7  | <b>2.2</b> | <b>0.4</b> | 3.2        | <b>2.4</b> |  |  |  |  |
|      | <i>S. glossinidius</i>   |          |       | 108.020     | 20.970  | 92/2515          | 224/277  | 9.1        | 3.1        | 5.6         | 6.0        | 0.0        | 7.6        | 5.1        | 7.2        | <b>1.0</b> | 6.2         | 9.9  | 8.6         | 2.5        | 1.4        | 2.3        | 9.7  | 8.6        | <b>0.4</b> | 1.9        | 3.9        |  |  |  |  |
| FliK | <i>γ</i> Proteobacteria  | 208      | 160   | 104.442     | 19.734  |                  |          | 14.1       | 2.7        | 3.8         | 6.2        | 0.0        | 5.3        | 8.2        | 6.4        | 2.0        | 3.2         | 10.6 | 4.1         | 1.9        | 1.8        | 6.4        | 9.6  | 7.7        | 0.4        | 0.4        | 4.9        |  |  |  |  |
|      | <i>W. glossinidia</i>    |          |       | 120.408     | 25.627  | 328/611          | 155/160  | <b>0.5</b> | <b>0.2</b> | <b>17.0</b> | 9.0        | <b>0.5</b> | 7.8        | <b>1.9</b> | <b>1.0</b> | <b>0.5</b> | <b>11.2</b> | 8.8  | <b>16.5</b> | <b>0.5</b> | <b>8.0</b> | <b>0.2</b> | 6.6  | <b>1.7</b> | <b>0.0</b> | <b>5.8</b> | <b>2.2</b> |  |  |  |  |
|      | <i>S. glossinidius</i>   |          |       | 105.888     | 20.726  | 57/2515          | 151/160  | 14.2       | 5.4        | 2.4         | 5.6        | <b>0.5</b> | 3.8        | 8.6        | 7.5        | <b>4.3</b> | 3.5         | 11.8 | <b>1.9</b>  | 1.1        | 1.3        | 7.3        | 5.9  | 7.8        | 0.5        | <b>1.3</b> | 5.1        |  |  |  |  |
|      | <i>B. aphidicola</i> APS |          |       | 118.654     | 26.538  | 479/574          | 160/160  | <b>0.9</b> | <b>0.4</b> | <b>11.9</b> | 4.3        | <b>0.4</b> | 4.7        | <b>1.3</b> | <b>0.9</b> | 3.0        | <b>14.0</b> | 7.7  | <b>20.4</b> | 2.1        | <b>4.7</b> | <b>2.1</b> | 9.8  | <b>3.4</b> | <b>0.9</b> | <b>4.7</b> | 2.6        |  |  |  |  |
|      | <i>B. aphidicola</i> SG  |          |       | 119.464     | 26.081  | 408/545          | 158/160  | <b>1.3</b> | 2.4        | <b>15.5</b> | 4.2        | <b>1.0</b> | 4.7        | <b>3.1</b> | <b>1.3</b> | 2.4        | <b>10.8</b> | 7.1  | <b>17.6</b> | 1.8        | <b>8.4</b> | <b>1.3</b> | 7.3  | 3.9        | 0.3        | <b>3.1</b> | <b>2.4</b> |  |  |  |  |
| FlgD | <i>γ</i> Proteobacteria  | 232      | 232   | 104.719     | 20.362  |                  |          | 8.2        | 1.7        | 6.6         | 5.7        | 0.0        | 4.6        | 7.0        | 9.6        | 0.6        | 4.7         | 9.3  | 4.3         | 2.8        | 2.5        | 3.5        | 10.1 | 8.9        | 0.4        | 1.4        | 8.0        |  |  |  |  |
|      | <i>W. glossinidia</i>    |          |       | 115.399     | 23.758  | 81/611           | 232/232  | <b>1.4</b> | 1.8        | <b>16.1</b> | 4.7        | 0.0        | 7.2        | 4.3        | <b>3.9</b> | <b>1.4</b> | <b>11.8</b> | 7.5  | <b>11.5</b> | 2.2        | <b>5.7</b> | 2.5        | 6.8  | 6.5        | 0.4        | 1.8        | <b>2.5</b> |  |  |  |  |
|      | <i>S. glossinidius</i>   |          |       | 107.147     | 21.125  | 15/2515          | 213/232  | 11.5       | 2.6        | 7.8         | 6.3        | <b>0.4</b> | 4.8        | 5.6        | 7.1        | 0.7        | 3.0         | 9.3  | 6.3         | 4.1        | 2.6        | 4.1        | 7.8  | 5.6        | 0.4        | 2.6        | 7.4        |  |  |  |  |
|      | <i>B. aphidicola</i> APS |          |       | 110.889     | 22.048  | 8/574            | 230/232  | <b>3.4</b> | 1.3        | <b>14.0</b> | 5.9        | 0.0        | 3.4        | 7.2        | <b>4.2</b> | <b>1.3</b> | <b>12.3</b> | 8.5  | 8.5         | 2.1        | 2.5        | 4.7        | 8.9  | 5.9        | 0.4        | 0.8        | 4.7        |  |  |  |  |
|      | <i>B. aphidicola</i> SG  |          |       | 109.811     | 22.002  | 8/545            | 228/232  | <b>3.5</b> | 1.3        | 12.4        | 4.4        | 0.0        | 4.0        | 6.2        | 4.9        | <b>2.2</b> | <b>14.2</b> | 8.0  | 8.4         | 2.2        | <b>0.9</b> | 2.2        | 9.7  | 8.0        | 0.4        | 0.9        | 6.2        |  |  |  |  |
| FlgE | <i>γ</i> Proteobacteria  | 260      | 253   | 105.108     | 20.884  |                  |          | 9.5        | 2.2        | 9.1         | 5.9        | 0.0        | 3.1        | 5.8        | 10.1       | 0.6        | 4.3         | 7.0  | 3.1         | 1.9        | 4.3        | 3.5        | 9.5  | 10.0       | 0.6        | 2.8        | 6.6        |  |  |  |  |
|      | <i>W. glossinidia</i>    |          |       | 108.765     | 22.121  | 13/611           | 250/253  | <b>3.9</b> | 1.2        | 11.2        | 4.9        | <b>0.2</b> | 4.4        | 6.1        | 9.0        | <b>1.2</b> | <b>9.5</b>  | 6.3  | <b>6.3</b>  | 2.7        | 4.4        | 2.7        | 12.9 | <b>4.6</b> | 0.5        | 2.9        | 4.9        |  |  |  |  |
|      | <i>S. glossinidius</i>   |          |       | 107.360     | 22.062  | 446/2515         | 249/253  | 7.9        | 1.5        | 7.7         | 5.4        | <b>0.5</b> | 4.5        | 6.2        | 11.1       | <b>0.2</b> | 5.2         | 6.7  | <b>6.4</b>  | 3.2        | 4.5        | 4.2        | 7.7  | 7.4        | 0.7        | 4.0        | 5.0        |  |  |  |  |
|      | <i>B. aphidicola</i> APS |          |       | 112.277     | 22.797  | 24/574           | 252/253  | <b>2.9</b> | 1.7        | 12.5        | 6.4        | <b>0.5</b> | 6.1        | 4.4        | 6.1        | 0.7        | <b>9.1</b>  | 7.6  | <b>8.1</b>  | 2.5        | 4.4        | <b>1.7</b> | 10.5 | 7.1        | 0.7        | 3.4        | 3.4        |  |  |  |  |
|      | <i>B. aphidicola</i> SG  |          |       | 112.295     | 23.113  | 43/545           | 253/253  | <b>2.9</b> | 1.5        | 12.2        | 6.6        | <b>0.2</b> | 5.6        | 5.1        | 6.1        | <b>1.7</b> | <b>12.0</b> | 9.3  | <b>7.6</b>  | 1.2        | 5.1        | 2.0        | 10.3 | <b>4.4</b> | 0.5        | 2.7        | <b>2.9</b> |  |  |  |  |
| FlgK | <i>γ</i> Proteobacteria  | 292      | 275   | 106.450     | 20.722  |                  |          | 10.3       | 3.4        | 8.0         | 6.5        | 0.0        | 4.2        | 6.5        | 8.3        | 0.7        | 4.9         | 9.1  | 3.8         | 2.3        | 3.1        | 2.5        | 9.3  | 7.6        | 0.2        | 2.5        | 6.6        |  |  |  |  |
|      | <i>W. glossinidia</i>    |          |       | 115.250     | 24.132  | 118/611          | 275/275  | <b>3.9</b> | 1.8        | 12.8        | 5.3        | 0.0        | <b>9.0</b> | <b>3.1</b> | 4.4        | <b>1.7</b> | <b>11.9</b> | 8.3  | <b>10.3</b> | <b>0.6</b> | <b>6.6</b> | <b>0.9</b> | 9.7  | <b>2.6</b> | 0.2        | 4.4        | <b>2.6</b> |  |  |  |  |
|      | <i>S. glossinidius</i>   |          |       | 108.524     | 20.891  | 76/2515          | 202/275  | 8.5        | 5.0        | 9.5         | 6.8        | 0.0        | 5.6        | 6.1        | 9.0        | 1.1        | 4.7         | 10.4 | 4.1         | <b>0.9</b> | 2.5        | 2.0        | 7.9  | 6.7        | 0.2        | 3.4        | 5.6        |  |  |  |  |
|      | <i>B. aphidicola</i> APS |          |       | 115.122     | 23.590  | 88/574           | 272/275  | <b>4.2</b> | 2.9        | 11.4        | 7.2        | <b>0.9</b> | 7.9        | 3.5        | <b>2.8</b> | <b>1.7</b> | <b>11.0</b> | 8.8  | <b>9.8</b>  | 1.8        | 3.7        | 2.0        | 6.6  | 4.2        | 0.2        | 3.7        | 5.5        |  |  |  |  |
|      | <i>B. aphidicola</i> SG  |          |       | 116.360     | 24.132  | 140/545          | 274/275  | <b>2.8</b> | 2.6        | 11.0        | 8.3        | <b>0.9</b> | 7.7        | 3.5        | <b>2.8</b> | <b>1.7</b> | <b>11.6</b> | 8.6  | <b>10.1</b> | 1.7        | 4.2        | 1.5        | 6.8  | 5.0        | 0.4        | 4.4        | 4.6        |  |  |  |  |
| FlgL | <i>γ</i> Proteobacteria  | 264      | 238   | 108.528     | 21.057  |                  |          | 9.6        | 3.7        | 6.9         | 7.3        | 0.0        | 5.2        | 7.4        | 6.6        | 0.8        | 4.9         | 8.9  | 4.3         | 2.9        | 3.3        | 2.3        | 10.0 | 7.0        | 0.3        | 2.6        | 5.9        |  |  |  |  |
|      | <i>W. glossinidia</i>    |          |       | 115.438     | 23.440  | 58/611           | 238/238  | <b>1.0</b> | 3.2        | 12.8        | <b>1.9</b> | <b>1.0</b> | 9.3        | 4.8        | <b>2.9</b> | <b>1.6</b> | <b>10.2</b> | 12.1 | <b>8.9</b>  | 2.2        | 3.5        | 1.3        | 13.1 | <b>3.5</b> | 0.3        | 3.2        | 3.2        |  |  |  |  |
|      | <i>S. glossinidius</i>   |          |       | 107.083     | 21.309  | 146/2515         | 176/238  | 11.2       | 3.8        | 4.8         | 8.0        | 0.0        | 3.5        | 7.3        | 9.6        | 1.3        | 5.1         | 9.3  | 4.8         | 4.2        | 2.6        | 1.9        | 7.3  | 5.4        | 0.3        | 2.9        | 6.7        |  |  |  |  |

**BOLD** = Amino acid % is 2X or 1/2 that of same protein average in *γ* Proteobacteria

**Notes:** \* Homologs whose lengths were 50% (+/-) their respective *E. coli* counterpart were removed. Comparisons were done on the remaining homologs.

\*\* Economic Rank in ATPs/aa (least expensive/total) amongst homologs and within each organism.

Amino acid percents in *γ*proteobacteria are on a per protein basis. The amino acid compositions of each protein are averaged and unweighted for length.

*Buchnera aphidicola* strains lack FliA, FliC, FliD, FliL, FliO, FliS, FliT, FlgM and FlgL (56).

**Table S26: Comparison of the ASC of extracellular protein with total proteins in 26 Gram-negative bacteria.\***

| Organism                                       | Group                  | % GC  | Number Proteins | Total Proteins |             | Extracellular Proteins |                  |                  |            |             |                    |             | U test (ASC)      |                 | % Savings  |             |
|------------------------------------------------|------------------------|-------|-----------------|----------------|-------------|------------------------|------------------|------------------|------------|-------------|--------------------|-------------|-------------------|-----------------|------------|-------------|
|                                                |                        |       |                 | ASC per aa     | Mass per aa | #                      | # ASC < Org. ASC | % ASC < Org. ASC | ASC per aa | Mass per aa | Average Percentile | ATP Savings | vs Cyto. Proteins | vs All Proteins | ASC per aa | Mass per aa |
| <i>Arcobacter butzleri</i> RM4018              | Epsilonproteobacteria  | 27    | 2259            | 24.608         | 113.851     | 13                     | 12               | 92.31            | 21.736     | 108.451     | 90                 | 2.87        | 1.75E-07          | 1.12E-07        | 11.67      | 4.74        |
| <i>Flavobacterium johnsoniae</i> UW101         | Bacteroidetes/Chlorobi | 34.11 | 5017            | 24.443         | 113.337     | 35                     | 29               | 82.86            | 23.245     | 109.862     | 74.5               | 1.2         | 3.27E-05          | 5.72E-07        | 4.9        | 3.07        |
| <i>Trichodesmium erythraeum</i> IMS101         | Cyanobacteria          | 34.14 | 4451            | 24.086         | 112.993     | 46                     | 46               | 100              | 21.195     | 106.929     | 93                 | 2.89        | 1.75E-22          | 9.50E-24        | 12         | 5.37        |
| <i>Colwellia psychrerythraea</i> 34H           | Gammaproteobacteria    | 38    | 4910            | 23.864         | 111.778     | 37                     | 31               | 83.78            | 21.894     | 107.82      | 80.3               | 1.97        | 1.14E-07          | 2.17E-10        | 8.26       | 3.54        |
| <i>Cytophaga hutchinsonii</i> ATCC 33406       | Bacteroidetes/Chlorobi | 38.8  | 3785            | 24.53          | 112.817     | 40                     | 39               | 97.50            | 22.602     | 106.967     | 85.2               | 1.93        | 2.28E-12          | 1.67E-14        | 7.86       | 5.19        |
| <i>Acinetobacter sp.</i> ADP1                  | Gammaproteobacteria    | 40.4  | 3325            | 23.947         | 112.141     | 11                     | 10               | 90.91            | 22.095     | 106.614     | 81                 | 1.85        | 1.35E-03          | 3.80E-04        | 7.73       | 4.93        |
| <i>Photorhabdus luminescens laumondii</i> TTO1 | Gammaproteobacteria    | 42.8  | 4683            | 23.863         | 112.161     | 33                     | 31               | 93.94            | 22.02      | 108.192     | 83.5               | 1.84        | 2.23E-10          | 3.11E-11        | 7.72       | 3.54        |
| <i>Aquifex aeolicus</i> VF5 <sup>1</sup>       | Aquificae              | 43.3  | 1560            | 24.774         | 114.13      | 11                     | 10               | 90.91            | 23.214     | 111.694     | 81.8               | 1.56        | 7.80E-04          | 2.78E-04        | 6.3        | 2.13        |
| <i>Shewanella oneidensis</i> MR-1              | Gammaproteobacteria    | 45.9  | 4471            | 23.54          | 111.158     | 36                     | 34               | 94.44            | 21.357     | 106.088     | 89.1               | 2.18        | 4.85E-16          | 6.09E-16        | 9.27       | 4.56        |
| <i>Synechocystis sp.</i> PCC 6803              | Cyanobacteria          | 47.3  | 3564            | 23.583         | 111.507     | 12                     | 10               | 83.33            | 22.151     | 107.61      | 77.7               | 1.43        | 2.50E-03          | 9.17E-04        | 6.07       | 3.49        |
| <i>Vibrio cholerae O1 biovar eltor</i> N16961  | Gammaproteobacteria    | 47.5  | 3835            | 23.759         | 111.782     | 50                     | 45               | 90.00            | 22.278     | 108.608     | 77.3               | 1.48        | 8.97E-09          | 2.96E-11        | 6.23       | 2.84        |
| <i>Wolinella succinogenes</i> DSM 1740         | Epsilonproteobacteria  | 48.5  | 2044            | 24.042         | 112.206     | 13                     | 13               | 100              | 21.439     | 107.44      | 93.7               | 2.6         | 3.40E-08          | 5.48E-08        | 10.83      | 4.25        |
| <i>Escherichia coli</i> K-12 MG1655            | Gammaproteobacteria    | 50.8  | 4333            | 23.555         | 111.005     | 16                     | 16               | 100              | 20.652     | 104.9       | 93.4               | 2.9         | 2.19E-09          | 1.96E-09        | 12.32      | 5.5         |
| <i>Salmonella typhimurium</i> LT2              | Gammaproteobacteria    | 52.2  | 4527            | 23.532         | 110.908     | 58                     | 51               | 87.93            | 21.676     | 107.196     | 81.4               | 1.86        | 1.43E-14          | 2.22E-16        | 7.89       | 3.35        |
| <i>Magnetococcus</i> MC-1                      | Other                  | 54.2  | 3716            | 23.277         | 110.848     | 37                     | 37               | 100              | 20.261     | 105.888     | 94.2               | 3.02        | 1.08E-20          | 2.00E-20        | 12.96      | 4.47        |
| <i>Rhodopirellula baltica</i> SH 1             | Plantomycetes          | 55.4  | 7325            | 23.011         | 110.75      | 24                     | 21               | 87.50            | 20.872     | 106.693     | 85.9               | 2.14        | 1.54E-09          | 1.15E-09        | 9.3        | 3.66        |
| <i>Marinobacter aquaeolei</i> VT8              | Gammaproteobacteria    | 57    | 4272            | 23.077         | 110.776     | 19                     | 19               | 100              | 20.671     | 106.006     | 93.2               | 2.41        | 1.95E-11          | 7.50E-11        | 10.43      | 4.31        |
| <i>Pseudomonas syringae pv. tomato</i> DC3000  | Gammaproteobacteria    | 58.3  | 5608            | 23.047         | 110.075     | 84                     | 70               | 83.33            | 21.581     | 107.296     | 77.1               | 1.47        | 9.94E-18          | 1.25E-17        | 6.36       | 2.52        |
| <i>Silicibacter sp.</i> TM1040                 | Alphaproteobacteria    | 60.1  | 3864            | 22.754         | 109.053     | 29                     | 29               | 100              | 20.397     | 104.447     | 92.7               | 2.36        | 4.34E-16          | 2.22E-15        | 10.36      | 4.22        |
| <i>Roseiflexus castenholzii</i> DSM 13941      | Chloroflexi            | 60.7  | 4330            | 23.072         | 109.936     | 22                     | 22               | 100              | 21.316     | 105.67      | 89.3               | 1.76        | 1.13E-10          | 2.02E-10        | 7.61       | 3.88        |
| <i>Burkholderia xenovorans</i> LB400           | Betaproteobacteria     | 62.6  | 8702            | 22.762         | 108.813     | 45                     | 39               | 86.67            | 21.063     | 103.631     | 79.1               | 1.7         | 5.80E-12          | 1.45E-11        | 7.46       | 4.76        |
| <i>Ralstonia eutropha</i> JMP134               | Betaproteobacteria     | 64.5  | 6446            | 22.648         | 108.437     | 30                     | 27               | 90.00            | 20.62      | 104.01      | 86.3               | 2.03        | 2.17E-12          | 6.63E-12        | 8.95       | 4.08        |
| <i>Pseudomonas aeruginosa</i> PAO1             | Gammaproteobacteria    | 66.6  | 5667            | 22.881         | 109.787     | 48                     | 41               | 85.42            | 21.392     | 105.903     | 79.2               | 1.49        | 2.89E-12          | 3.56E-12        | 6.51       | 3.54        |
| <i>Caulobacter crescentus</i> CB15             | Alphaproteobacteria    | 67.2  | 3737            | 22.423         | 107.884     | 27                     | 22               | 81.48            | 20.955     | 103.973     | 79                 | 1.47        | 2.95E-07          | 1.95E-07        | 6.55       | 3.63        |
| <i>Rhodobacter sphaeroides</i> 2.4.1           | Alphaproteobacteria    | 68.8  | 4242            | 22.481         | 108.15      | 29                     | 29               | 100              | 20.251     | 102.962     | 90.1               | 2.23        | 7.22E-15          | 9.25E-14        | 9.92       | 4.8         |
| <i>Anaeromyxobacter dehalogenans</i> 2CP-C     | Deltaproteobacteria    | 74.9  | 4346            | 21.913         | 106.92      | 28                     | 27               | 96.43            | 20.249     | 102.949     | 84.4               | 1.66        | 2.54E-12          | 2.00E-10        | 7.59       | 3.71        |

\* Each is capable of aerobic growth and has the capacity to synthesize all 20 amino acids (See notes in Table S25 – Tab H in Data Set S1).

<sup>1</sup> *Aquifex aeolicus* VF5 was not graphed in Fig. 5B and was not used in later analysis. Many hyperthermophiles (>96°C) do not follow the %GC cost trends of other organisms (See Fig. 5A) possibly due to different amino acid biases needed for protein folding at higher temperatures. Many thermophiles display weak cost selection relative to mesophiles (97), perhaps because the Gibbs free energy of amino acid formation is radically different in hydrothermal vents (Table S1) (6).

## References

1. [http://redpoll.pharmacy.ualberta.ca/CCDB/cgi-bin/STAT\\_NEW.cgi](http://redpoll.pharmacy.ualberta.ca/CCDB/cgi-bin/STAT_NEW.cgi).
2. **Akashi, H., and T. Gojobori.** 2002. Metabolic efficiency and amino acid composition in the proteomes of *Escherichia coli* and *Bacillus subtilis*. *Proc Natl Acad Sci U S A* **99**:3695-700.
3. **Akman Gunduz, E., and A. E. Douglas.** 2009. Symbiotic bacteria enable insect to use a nutritionally inadequate diet. *Proc Biol Sci* **276**:987-91.
4. **Akman, L., A. Yamashita, H. Watanabe, K. Oshima, T. Shiba, M. Hattori, and S. Aksoy.** 2002. Genome sequence of the endocellular obligate symbiont of tsetse flies, *Wigglesworthia glossinidia*. *Nat Genet* **32**:402-7.
5. **Alm, R. A., U. H. Stroehrer, and P. A. Manning.** 1988. Extracellular proteins of *Vibrio cholerae*: nucleotide sequence of the structural gene (*hlyA*) for the haemolysin of the haemolytic El Tor strain 017 and characterization of the *hlyA* mutation in the non-haemolytic classical strain 569B. *Mol Microbiol* **2**:481-8.
6. **Amend, J. P., and E. L. Shock.** 1998. Energetics of amino acid synthesis in hydrothermal ecosystems. *Science* **281**:1659-62.
7. **Arnold, R., S. Brandmaier, F. Kleine, P. Tischler, E. Heinz, S. Behrens, A. Niinikoski, H. W. Mewes, M. Horn, and T. Rattei.** 2009. Sequence-based prediction of type III secreted proteins. *PLoS Pathog* **5**:e1000376.
8. **Atkinson, D. E.** 1977. *Cellular Energy Metabolism and Its Regulation*, vol. Academic Press, New York.
9. **Baar, C., M. Eppinger, G. Raddatz, J. Simon, C. Lanz, O. Klimmek, R. Nandakumar, R. Gross, A. Rosinus, H. Keller, P. Jagtap, B. Linke, F. Meyer, H. Lederer, and S. C. Schuster.** 2003. Complete genome sequence and analysis of *Wolinella succinogenes*. *Proc Natl Acad Sci U S A* **100**:11690-5.
10. **Bauchop, T., and S. R. Elsdon.** 1960. The growth of micro-organisms in relation to their energy supply. *J Gen Microbiol* **23**:457-69.
11. **Berg, H. C.** 2000. Constraints on models for the flagellar rotary motor. *Philos Trans R Soc Lond B Biol Sci* **355**:491-501.
12. **Berg, H. C.** 1974. Dynamic properties of bacterial flagellar motors. *Nature* **249**:77-9.
13. **Berg, H. C.** 2003. The rotary motor of bacterial flagella. *Annu Rev Biochem* **72**:19-54.
14. **Berg, H. C., and L. Turner.** 1993. Torque generated by the flagellar motor of *Escherichia coli*. *Biophys J* **65**:2201-16.
15. **Beskhebnaya, V. A., E. V. Trinchina, P. Aprikyan, V. Chesnokova, and E. V. Sokurenko.** 2006. Molecular genetic analysis of *Escherichia coli* type I adhesins. *Bull Exp Biol Med* **141**:339-42.
16. **Bingle, L. E., C. M. Bailey, and M. J. Pallen.** 2008. Type VI secretion: a beginner's guide. *Curr Opin Microbiol* **11**:3-8.
17. **Bragg, J. G., and A. Wagner.** 2007. Protein carbon content evolves in response to carbon availability and may influence the fate of duplicated genes. *Proc Biol Sci* **274**:1063-70.
18. **Capitani, G., O. Eidam, R. Glockshuber, and M. G. Grutter.** 2006. Structural and functional insights into the assembly of type 1 pili from *Escherichia coli*. *Microbes Infect* **8**:2284-90.

19. **Chen, X., and H. C. Berg.** 2000. Torque-speed relationship of the flagellar rotary motor of *Escherichia coli*. *Biophys J* **78**:1036-41.
20. **Chevance, F. F., and K. T. Hughes.** 2008. Coordinating assembly of a bacterial macromolecular machine. *Nat Rev Microbiol* **6**:455-65.
21. **Craig, C. L., and R. S. Weber.** 1998. Selection costs of amino acid substitutions in *ColE1* and *ColIa* gene clusters harbored by *Escherichia coli*. *Mol Biol Evol* **15**:774-6.
22. **DeRosier, D. J.** 1995. Spinning tails. *Curr Opin Struct Biol* **5**:187-93.
23. **DeRosier, D. J.** 1998. The turn of the screw: the bacterial flagellar motor. *Cell* **93**:17-20.
24. **Douglas, A. E.** 2006. Phloem-sap feeding by animals: problems and solutions. *J Exp Bot* **57**:747-54.
25. **Duong, F., E. Bonnet, V. Geli, A. Lazdunski, M. Murgier, and A. Filloux.** 2001. The AprX protein of *Pseudomonas aeruginosa*: a new substrate for the Apr type I secretion system. *Gene* **262**:147-53.
26. **Farmer, I. S., and C. W. Jones.** 1976. The energetics of *Escherichia coli* during aerobic growth in continuous culture. *Eur J Biochem* **67**:115-22.
27. **Feist, A. M., C. S. Henry, J. L. Reed, M. Krummenacker, A. R. Joyce, P. D. Karp, L. J. Broadbelt, V. Hatzimanikatis, and B. O. Palsson.** 2007. A genome-scale metabolic reconstruction for *Escherichia coli* K-12 MG1655 that accounts for 1260 ORFs and thermodynamic information. *Mol Syst Biol* **3**:121.
28. **Gabel, C. V., and H. C. Berg.** 2003. The speed of the flagellar rotary motor of *Escherichia coli* varies linearly with protonmotive force. *Proc Natl Acad Sci U S A* **100**:8748-51.
29. **Galan, J. E., and H. Wolf-Watz.** 2006. Protein delivery into eukaryotic cells by type III secretion machines. *Nature* **444**:567-73.
30. **Gohl, O., A. Friedrich, M. Hoppert, and B. Averhoff.** 2006. The thin pili of *Acinetobacter* sp. strain BD413 mediate adhesion to biotic and abiotic surfaces. *Appl Environ Microbiol* **72**:1394-401.
31. **Guo, M., F. Tian, Y. Wamboldt, and J. R. Alfano.** 2009. The majority of the type III effector inventory of *Pseudomonas syringae* pv. tomato DC3000 can suppress plant immunity. *Mol Plant Microbe Interact* **22**:1069-80.
32. **Haddix, P. L., S. Jones, P. Patel, S. Burnham, K. Knights, J. N. Powell, and A. LaForm.** 2008. Kinetic analysis of growth rate, ATP, and pigmentation suggests an energy-spilling function for the pigment prodigiosin of *Serratia marcescens*. *J Bacteriol* **190**:7453-63.
33. **Hahn, E., P. Wild, U. Hermanns, P. Sebbel, R. Glockshuber, M. Haner, N. Taschner, P. Burkhard, U. Aebi, and S. A. Muller.** 2002. Exploring the 3D molecular architecture of *Escherichia coli* type 1 pili. *J Mol Biol* **323**:845-57.
34. **Hasegawa, K., I. Yamashita, and K. Namba.** 1998. Quasi- and nonequivalence in the structure of bacterial flagellar filament. *Biophys J* **74**:569-75.
35. **Hauser, A. R.** 2009. The type III secretion system of *Pseudomonas aeruginosa*: infection by injection. *Nat Rev Microbiol* **7**:654-65.
36. **Heizer, E. M., Jr., D. W. Raiford, M. L. Raymer, T. E. Doom, R. V. Miller, and D. E. Krane.** 2006. Amino acid cost and codon-usage biases in 6 prokaryotic genomes: a whole-genome analysis. *Mol Biol Evol* **23**:1670-80.

37. **Hempfling, W. P., and S. E. Mainzer.** 1975. Effects of varying the carbon source limiting growth on yield and maintenance characteristics of *Escherichia coli* in continuous culture. *J Bacteriol* **123**:1076-87.
38. **Henderson, I. R., F. Navarro-Garcia, M. Desvaux, R. C. Fernandez, and D. Ala'Aldeen.** 2004. Type V protein secretion pathway: the autotransporter story. *Microbiol Mol Biol Rev* **68**:692-744.
39. **Horler, R. S., A. Butcher, N. Papangelopoulos, P. D. Ashton, and G. H. Thomas.** 2009. EchoLOCATION: an in silico analysis of the subcellular locations of *Escherichia coli* proteins and comparison with experimentally derived locations. *Bioinformatics* **25**:163-6.
40. **Hughes, K. T., K. L. Gillen, M. J. Semon, and J. E. Karlinsey.** 1993. Sensing structural intermediates in bacterial flagellar assembly by export of a negative regulator. *Science* **262**:1277-80.
41. **Iino, T.** 1969. Polarity of flagellar growth in salmonella. *J Gen Microbiol* **56**:227-39.
42. **Ishihama, Y., T. Schmidt, J. Rappsilber, M. Mann, F. U. Hartl, M. J. Kerner, and D. Frishman.** 2008. Protein abundance profiling of the *Escherichia coli* cytosol. *BMC Genomics* **9**:102.
43. **Jamir, Y., M. Guo, H. S. Oh, T. Petnicki-Ocwieja, S. Chen, X. Tang, M. B. Dickman, A. Collmer, and J. R. Alfano.** 2004. Identification of *Pseudomonas syringae* type III effectors that can suppress programmed cell death in plants and yeast. *Plant J* **37**:554-65.
44. **Jarrell, K. F., and M. J. McBride.** 2008. The surprisingly diverse ways that prokaryotes move. *Nat Rev Microbiol* **6**:466-76.
45. **Karp, P. D., I. M. Keseler, A. Shearer, M. Latendresse, M. Krummenacker, S. M. Paley, I. Paulsen, J. Collado-Vides, S. Gama-Castro, M. Peralta-Gil, A. Santos-Zavaleta, M. I. Penaloza-Spinola, C. Bonavides-Martinez, and J. Ingraham.** 2007. Multidimensional annotation of the *Escherichia coli* K-12 genome. *Nucleic Acids Res* **35**:7577-90.
46. **Khan, S., D. Pierce, and R. D. Vale.** 2000. Interactions of the chemotaxis signal protein CheY with bacterial flagellar motors visualized by evanescent wave microscopy. *Curr Biol* **10**:927-30.
47. **Krogfelt, K. A., and P. Klemm.** 1988. Investigation of minor components of *Escherichia coli* type 1 fimbriae: protein chemical and immunological aspects. *Microb Pathog* **4**:231-8.
48. **Kutsukake, K.** 1994. Excretion of the anti-sigma factor through a flagellar substructure couples flagellar gene expression with flagellar assembly in *Salmonella typhimurium*. *Mol Gen Genet* **243**:605-12.
49. **Kutsukake, K., and T. Iino.** 1994. Role of the FliA-FlgM regulatory system on the transcriptional control of the flagellar regulon and flagellar formation in *Salmonella typhimurium*. *J Bacteriol* **176**:3598-605.
50. **Li, N., J. Lv, and D. K. Niu.** 2009. Low contents of carbon and nitrogen in highly abundant proteins: evidence of selection for the economy of atomic composition. *J Mol Evol* **68**:248-55.
51. **Link, C., S. Eickernjager, D. Porstendorfer, and B. Averhoff.** 1998. Identification and characterization of a novel competence gene, *comC*, required for DNA binding and uptake in *Acinetobacter* sp. strain BD413. *J Bacteriol* **180**:1592-5.

52. **Liu, D., and P. R. Reeves.** 1994. Escherichia coli K12 regains its O antigen. *Microbiology* **140 ( Pt 1):**49-57.
53. **Lowe, G., Meister, M., & Berg, H.C.** 1987. Rapid rotation of flagellar bundles in swimming bacteria. *Nature* **325:**637 - 640.
54. **Lowe, M. A., S. C. Holt, and B. I. Eisenstein.** 1987. Immunoelectron microscopic analysis of elongation of type 1 fimbriae in Escherichia coli. *J Bacteriol* **169:**157-63.
55. **Macnab, R. M.** 2003. How bacteria assemble flagella. *Annu Rev Microbiol* **57:**77-100.
56. **Maezawa, K., S. Shigenobu, H. Taniguchi, T. Kubo, S. Aizawa, and M. Morioka.** 2006. Hundreds of flagellar basal bodies cover the cell surface of the endosymbiotic bacterium *Buchnera aphidicola* sp. strain APS. *J Bacteriol* **188:**6539-43.
57. **Masuda, T., N. Saito, M. Tomita, and Y. Ishihama.** 2009. Unbiased quantitation of Escherichia coli membrane proteome using phase-transfer surfactants. *Mol Cell Proteomics*.
58. **McGuffin, L. J., K. Bryson, and D. T. Jones.** 2000. The PSIPRED protein structure prediction server. *Bioinformatics* **16:**404-5.
59. **Meister, M., S. R. Caplan, and H. C. Berg.** 1989. Dynamics of a tightly coupled mechanism for flagellar rotation. Bacterial motility, chemiosmotic coupling, protonmotive force. *Biophys J* **55:**905-14.
60. **Meister, M., G. Lowe, and H. C. Berg.** 1987. The proton flux through the bacterial flagellar motor. *Cell* **49:**643-50.
61. **Minamino, T., B. Gonzalez-Pedrajo, K. Yamaguchi, S. I. Aizawa, and R. M. Macnab.** 1999. FliK, the protein responsible for flagellar hook length control in Salmonella, is exported during hook assembly. *Mol Microbiol* **34:**295-304.
62. **Minamino, T., S. Yamaguchi, and R. M. Macnab.** 2000. Interaction between FliE and FlgB, a proximal rod component of the flagellar basal body of Salmonella. *J Bacteriol* **182:**3029-36.
63. **Misra, R. V., R. S. Horler, W. Reindl, Goryanin, II, and G. H. Thomas.** 2005. EchoBASE: an integrated post-genomic database for Escherichia coli. *Nucleic Acids Res* **33:**D329-33.
64. **Mongioli, P., and R. Milo.** [http://openwetware.org/wiki/BioNumber\\_Of\\_The\\_Month](http://openwetware.org/wiki/BioNumber_Of_The_Month).
65. **Nakamura, S., N. Kami-ike, J. P. Yokota, S. Kudo, T. Minamino, and K. Namba.** 2009. Effect of intracellular pH on the torque-speed relationship of bacterial proton-driven flagellar motor. *J Mol Biol* **386:**332-8.
66. **Namba, K., and F. Vonderviszt.** 1997. Molecular architecture of bacterial flagellum. *Q Rev Biophys* **30:**1-65.
67. **Nambu, T., T. Minamino, R. M. Macnab, and K. Kutsukake.** 1999. Peptidoglycan-hydrolyzing activity of the FlgJ protein, essential for flagellar rod formation in *Salmonella typhimurium*. *J Bacteriol* **181:**1555-61.
68. **Nasset, E. S., F. P. Heald, D. H. Calloway, S. Margen, and P. Schneeman.** 1979. Amino acids in human blood plasma after single meals of meat, oil, sucrose and whiskey. *J Nutr* **109:**621-30.
69. **Nasset, E. S., and J. S. Ju.** 1969. Amino acids and glucose in human blood plasma after beef and nonprotein meals. *Proc Soc Exp Biol Med* **132:**1077-80.
70. **Neidhardt, F. C.** 1987. *Escherichia coli and Salmonella typhimurium : cellular and molecular biology*, vol. American Society for Microbiology, Washington, D.C.



71. **Neidhardt, F. C., R. Curtiss III, J. L. Ingraham, E. C. C. Lin, K. B. Low Jr., B. Magasanik, W. S. Reznikoff, M. Riley, M. Schaechter, and H. E. Umbarger.** 1996. *Escherichia coli* and *Salmonella*: Cellular and Molecular Biology, 2nd ed, vol. ASM Press, Washington, D.C.
72. **Neidhardt, F. C., J. L. Ingraham, and M. Schaechter.** 1990. *Physiology of the bacterial cell : a molecular approach*, vol. Sinauer Associates, Sunderland, Mass.
73. **Nenninger, A. A., L. S. Robinson, and S. J. Hultgren.** 2009. Localized and efficient curli nucleation requires the chaperone-like amyloid assembly protein CsgF. *Proc Natl Acad Sci U S A* **106**:900-5.
74. **Nishiyama, M., M. Vetsch, C. Puorger, I. Jelesarov, and R. Glockshuber.** 2003. Identification and characterization of the chaperone-subunit complex-binding domain from the type 1 pilus assembly platform FimD. *J Mol Biol* **330**:513-25.
75. **Oh, H. S., B. H. Kvitko, J. E. Morello, and A. Collmer.** 2007. *Pseudomonas syringae* lytic transglycosylases coregulated with the type III secretion system contribute to the translocation of effector proteins into plant cells. *J Bacteriol* **189**:8277-89.
76. **Ohnishi, K., Y. Ohto, S. Aizawa, R. M. Macnab, and T. Iino.** 1994. FlgD is a scaffolding protein needed for flagellar hook assembly in *Salmonella typhimurium*. *J Bacteriol* **176**:2272-81.
77. **Pirt, S. J.** 1965. The maintenance energy of bacteria in growing cultures. *Proc R Soc Lond B Biol Sci* **163**:224-31.
78. **Porstendorfer, D., O. Gohl, F. Mayer, and B. Averhoff.** 2000. ComP, a pilin-like protein essential for natural competence in *Acinetobacter* sp. Strain BD413: regulation, modification, and cellular localization. *J Bacteriol* **182**:3673-80.
79. **Proenza, A. M., C. Crespi, P. Roca, and A. Palou.** 2001. Gender related differences in the effect of aging on blood amino acid compartmentation\*. *J Nutr Biochem* **12**:431-440.
80. **Qu, J., Y. Wang, G. Luo, Z. Wu, and C. Yang.** 2002. Validated quantitation of underivatized amino acids in human blood samples by volatile ion-pair reversed-phase liquid chromatography coupled to isotope dilution tandem mass spectrometry. *Anal Chem* **74**:2034-40.
81. **Rey, S., M. Acab, J. L. Gardy, M. R. Laird, K. deFays, C. Lambert, and F. S. Brinkman.** 2005. PSORTdb: a protein subcellular localization database for bacteria. *Nucleic Acids Res* **33**:D164-8.
82. **Rosu, V., and K. T. Hughes.** 2006. sigma28-dependent transcription in *Salmonella enterica* is independent of flagellar shearing. *J Bacteriol* **188**:5196-203.
83. **Sandström, J., and N. Moran.** 1999. How nutritionally imbalanced is phloem sap for aphids? *Entomologia Experimentalis et Applicata* **91**:203-210.
84. **Sandstrom, J., A. Telang, and N. A. Moran.** 2000. Nutritional enhancement of host plants by aphids - a comparison of three aphid species on grasses. *J Insect Physiol* **46**:33-40.
85. **Schaber, J., C. Rispe, J. Wernegreen, A. Bunes, F. Delmotte, F. J. Silva, and A. Moya.** 2005. Gene expression levels influence amino acid usage and evolutionary rates in endosymbiotic bacteria. *Gene* **352**:109-17.
86. **Schechter, L. M., M. Vencato, K. L. Jordan, S. E. Schneider, D. J. Schneider, and A. Collmer.** 2006. Multiple approaches to a complete inventory of *Pseudomonas syringae* pv. tomato DC3000 type III secretion system effector proteins. *Mol Plant Microbe Interact* **19**:1180-92.

87. **Schumann, W.** 2006. Dynamics of the Bacterial Chromosome. Structure and Function., vol. Wiley-VCH, Weinheim, Germany.
88. **Schuster, S. C., and S. Khan.** 1994. The bacterial flagellar motor. *Annu Rev Biophys Biomol Struct* **23**:509-39.
89. **Shigenobu, S., H. Watanabe, M. Hattori, Y. Sakaki, and H. Ishikawa.** 2000. Genome sequence of the endocellular bacterial symbiont of aphids *Buchnera* sp. APS. *Nature* **407**:81-6.
90. **Sokurenko, E. V., H. S. Courtney, J. Maslow, A. Siitonen, and D. L. Hasty.** 1995. Quantitative differences in adhesiveness of type 1 fimbriated *Escherichia coli* due to structural differences in *fimH* genes. *J Bacteriol* **177**:3680-6.
91. **Sowa, Y., and R. M. Berry.** 2008. Bacterial flagellar motor. *Q Rev Biophys* **41**:103-32.
92. **Steigmiller, S., P. Turina, and P. Graber.** 2008. The thermodynamic H<sup>+</sup>/ATP ratios of the H<sup>+</sup>-ATPsynthases from chloroplasts and *Escherichia coli*. *Proc Natl Acad Sci U S A* **105**:3745-50.
93. **Stouthamer, A. H.** 1979. The search for correlation between theoretical and experimental growth yields, p. 1-47. *In* J. R. Quayle (ed.), *Int. Rev. Biochem. Microb. Biochem*, vol. 21. University Park Press.
94. **Stouthamer, A. H.** 1973. A theoretical study on the amount of ATP required for synthesis of microbial cell material. *Antonie Van Leeuwenhoek* **39**:545-65.
95. **Stouthamer, A. H., and C. Bettenhausen.** 1973. Utilization of energy for growth and maintenance in continuous and batch cultures of microorganisms. A reevaluation of the method for the determination of ATP production by measuring molar growth yields. *Biochim Biophys Acta* **301**:53-70.
96. **Stouthamer, A. H., and C. W. Bettenhausen.** 1977. A continuous culture study of an ATPase-negative mutant of *Escherichia coli*. *Arch Microbiol* **113**:185-9.
97. **Swire, J.** 2007. Selection on synthesis cost affects interprotein amino acid usage in all three domains of life. *J Mol Evol* **64**:558-71.
98. **Tamas, I., L. Klasson, B. Canback, A. K. Naslund, A. S. Eriksson, J. J. Wernegreen, J. P. Sandstrom, N. A. Moran, and S. G. Andersson.** 2002. 50 million years of genomic stasis in endosymbiotic bacteria. *Science* **296**:2376-9.
99. **Toh, E., H. D. Kurtz, Jr., and Y. V. Brun.** 2008. Characterization of the *Caulobacter crescentus* holdfast polysaccharide biosynthesis pathway reveals significant redundancy in the initiating glycosyltransferase and polymerase steps. *J Bacteriol* **190**:7219-31.
100. **Toh, H., B. L. Weiss, S. A. Perkin, A. Yamashita, K. Oshima, M. Hattori, and S. Aksoy.** 2006. Massive genome erosion and functional adaptations provide insights into the symbiotic lifestyle of *Sodalis glossinidius* in the tsetse host. *Genome Res* **16**:149-56.
101. **Toma, C., H. Kuroki, N. Nakasone, M. Ehara, and M. Iwanaga.** 2002. Minor pilin subunits are conserved in *Vibrio cholerae* type IV pili. *FEMS Immunol Med Microbiol* **33**:35-40.
102. **Tran, Q. H., and G. Udden.** 1998. Changes in the proton potential and the cellular energetics of *Escherichia coli* during growth by aerobic and anaerobic respiration or by fermentation. *Eur J Biochem* **251**:538-43.
103. **Trinchina, E. V.** 2003. Structural and functional study of the receptor binding site for FimH adhesin in uropathogenic strains of *Escherichia coli*. *Bull Exp Biol Med* **136**:380-4.

104. **Turina, P., D. Samoray, and P. Graber.** 2003. H<sup>+</sup>/ATP ratio of proton transport-coupled ATP synthesis and hydrolysis catalysed by CF0F1-liposomes. *Embo J* **22**:418-26.
105. **Wagner, A.** 2005. Energy constraints on the evolution of gene expression. *Mol Biol Evol* **22**:1365-74.
106. **Walz, D., and S. R. Caplan.** 2000. An electrostatic mechanism closely reproducing observed behavior in the bacterial flagellar motor. *Biophys J* **78**:626-51.
107. **Ward, J. J., J. S. Sodhi, L. J. McGuffin, B. F. Buxton, and D. T. Jones.** 2004. Prediction and functional analysis of native disorder in proteins from the three kingdoms of life. *J Mol Biol* **337**:635-45.
108. **Waters, R. C., P. W. O'Toole, and K. A. Ryan.** 2007. The FliK protein and flagellar hook-length control. *Protein Sci* **16**:769-80.
109. **Wilkinson, T. L., D. Adams, L. B. Minto, and A. E. Douglas.** 2001. The impact of host plant on the abundance and function of symbiotic bacteria in an aphid. *J Exp Biol* **204**:3027-38.
110. **Yonekura, K., S. Maki, D. G. Morgan, D. J. DeRosier, F. Vonderviszt, K. Imada, and K. Namba.** 2000. The bacterial flagellar cap as the rotary promoter of flagellin self-assembly. *Science* **290**:2148-52.
111. **Zientz, E., T. Dandekar, and R. Gross.** 2004. Metabolic interdependence of obligate intracellular bacteria and their insect hosts. *Microbiol Mol Biol Rev* **68**:745-70.
