# Supplementary material for: Economical Evolution: Microbes Reduce the Synthetic Cost of Extracellular Proteins
Source: PubMed Central journal article supplement — mBio. 2010 Aug 24;1(3):e00131-10. doi: 10.1128/mBio.00131-10 (PMC2932507; doi:10.1128/mbio.00131-10), 2010-08-24

**E. coli K-12 Protein Sublocations**

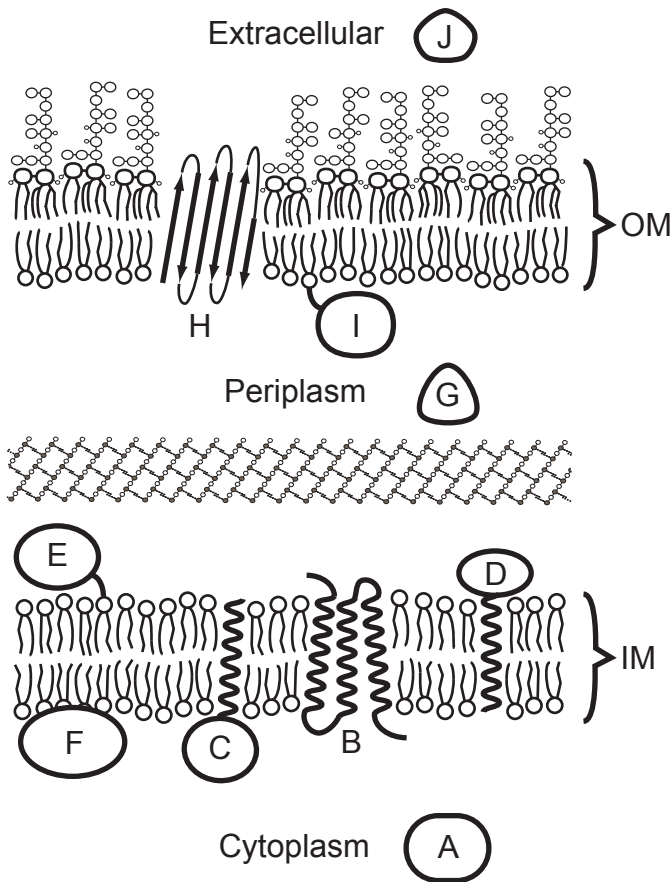

- A. Cytoplasmic
- B. Integral Membrane
- C. Membrane Anchored
- D. Periplasmic with N-terminal Anchor
- E. Inner Membrane Lipoprotein\*
- F. Membrane Associated
- G. Periplasmic
- H. Outer Membrane  $\beta$ -barrel
- I. Outer Membrane Lipoprotein\*
- J. Extracellular\*\*

\* Difficulty determining which membrane for seven "Membrane Lipoproteins" (VisC, YfbK, YiaF, YifL, YihN, YjbH, and YraM). These proteins included in "Inner Membrane" for Figures 1A, 3B, S1, S2, S5, S6 and Table S3-6.

\*\* Subdivided into "Secreted and released" and "Cell surface appendage"

Diagram to left based on figure from Echolocation: <http://www.york.ac.uk/res/thomas/echolocadv.cfm>

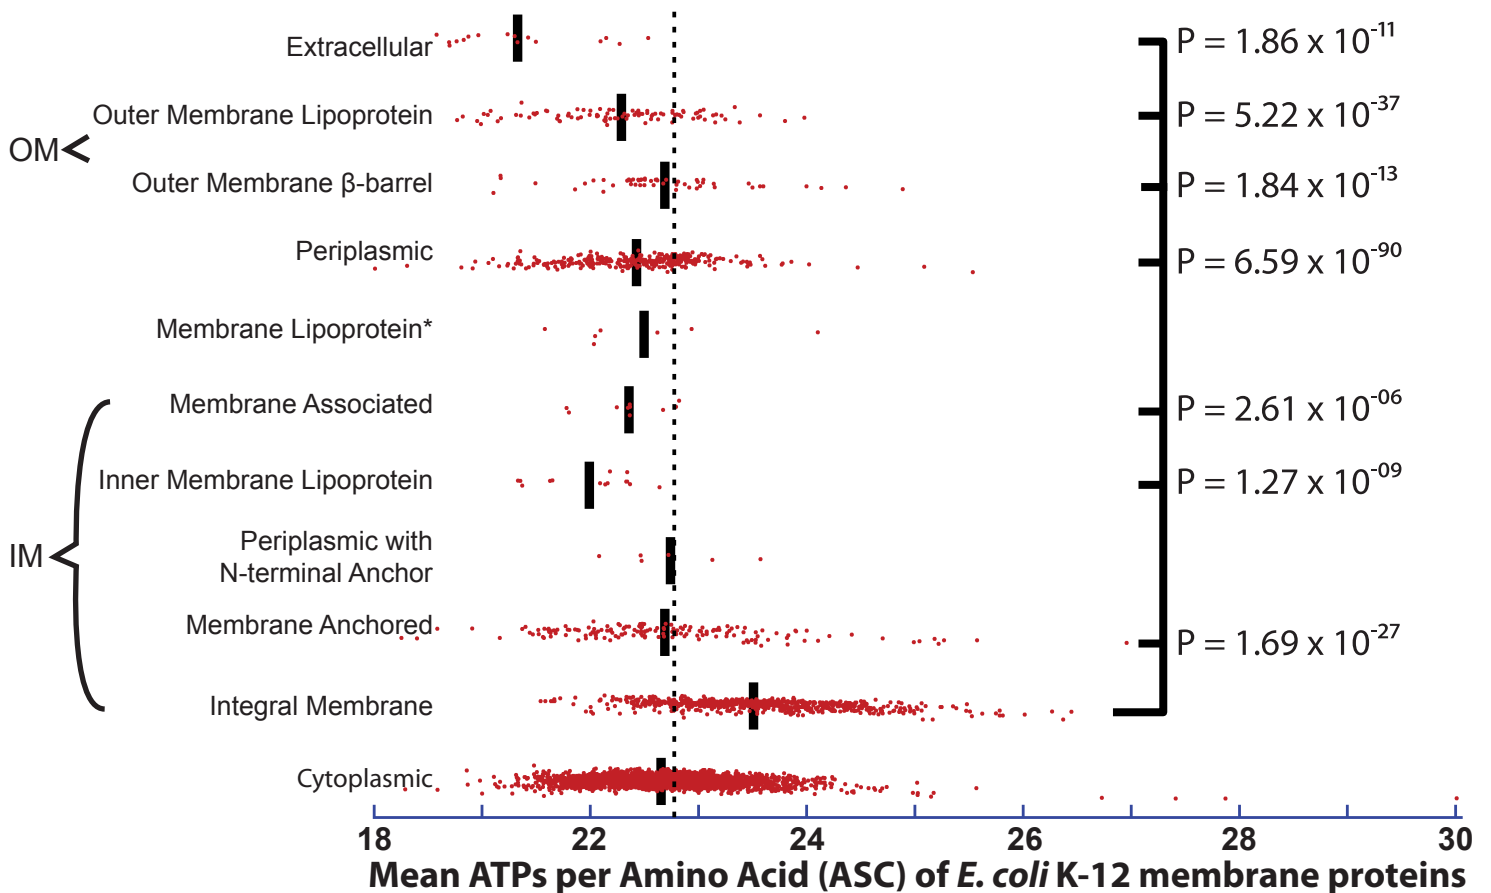

Supplement: mBio00131-10-sf01.pdf [file mBio00131-10-sf01.pdf]
