# Supplementary figures and images for: Economical Evolution: Microbes Reduce the Synthetic Cost of Extracellular Proteins
Source: PubMed Central journal article supplement — mBio. 2010 Aug 24;1(3):e00131-10. doi: 10.1128/mBio.00131-10 (PMC2932507; doi:10.1128/mbio.00131-10), 2010-08-24

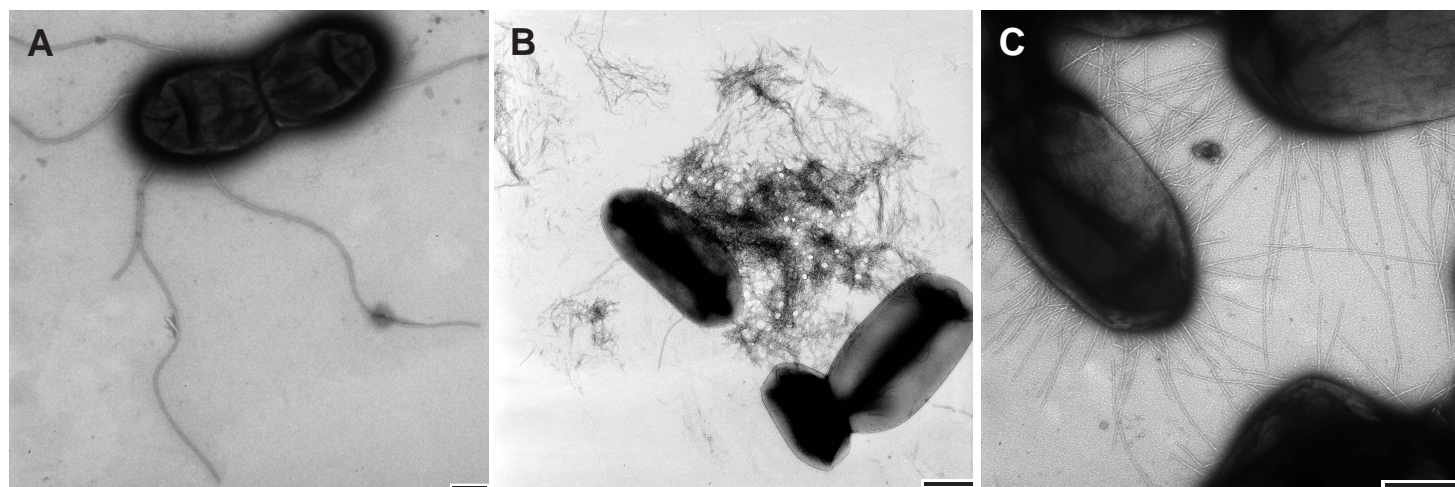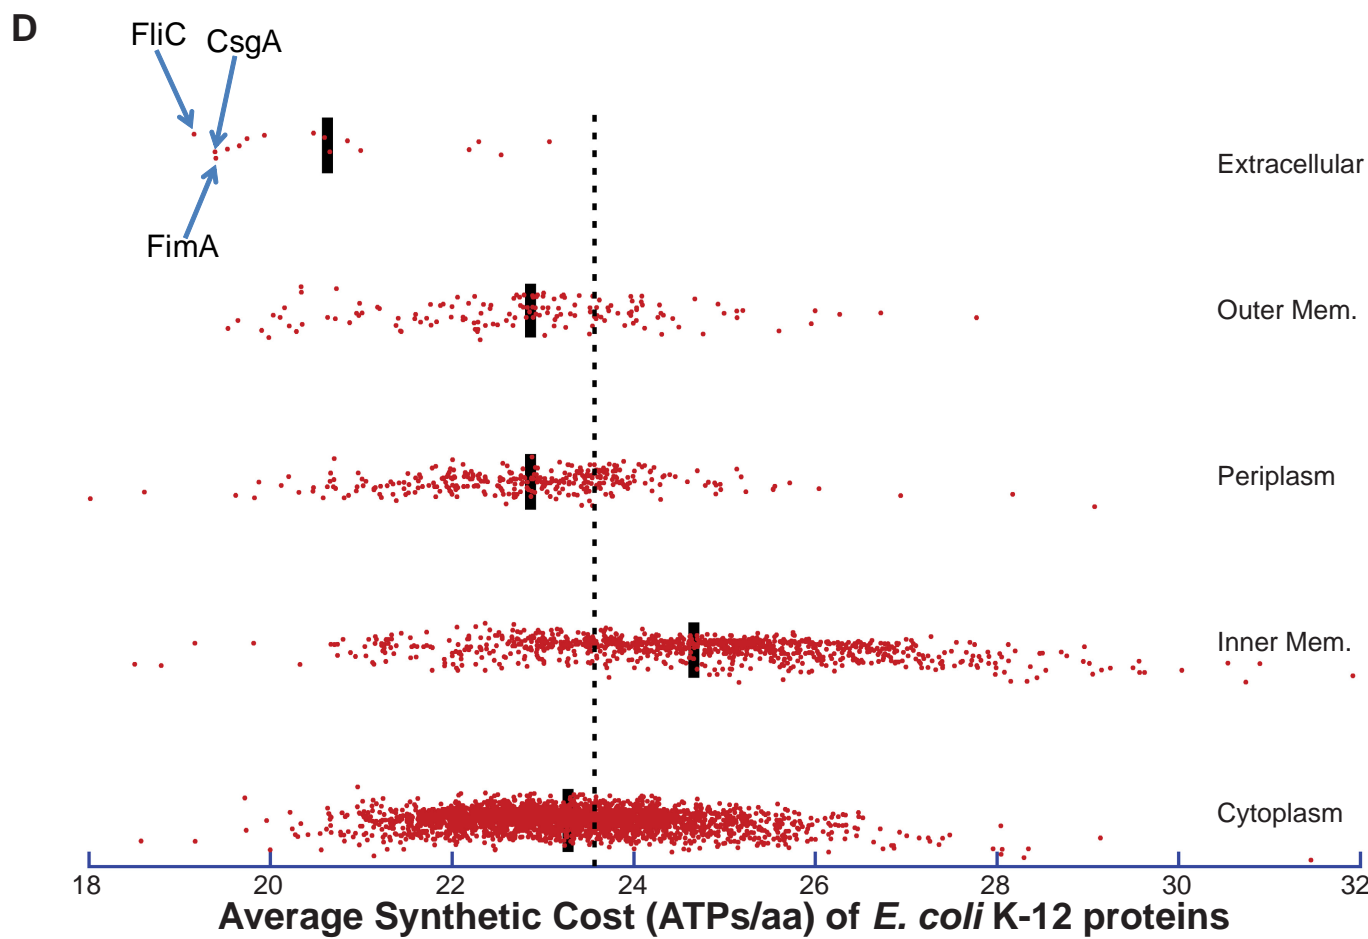

Supplement: mBio00131-10-sf02.pdf [file mBio00131-10-sf02.pdf]

Fig S3

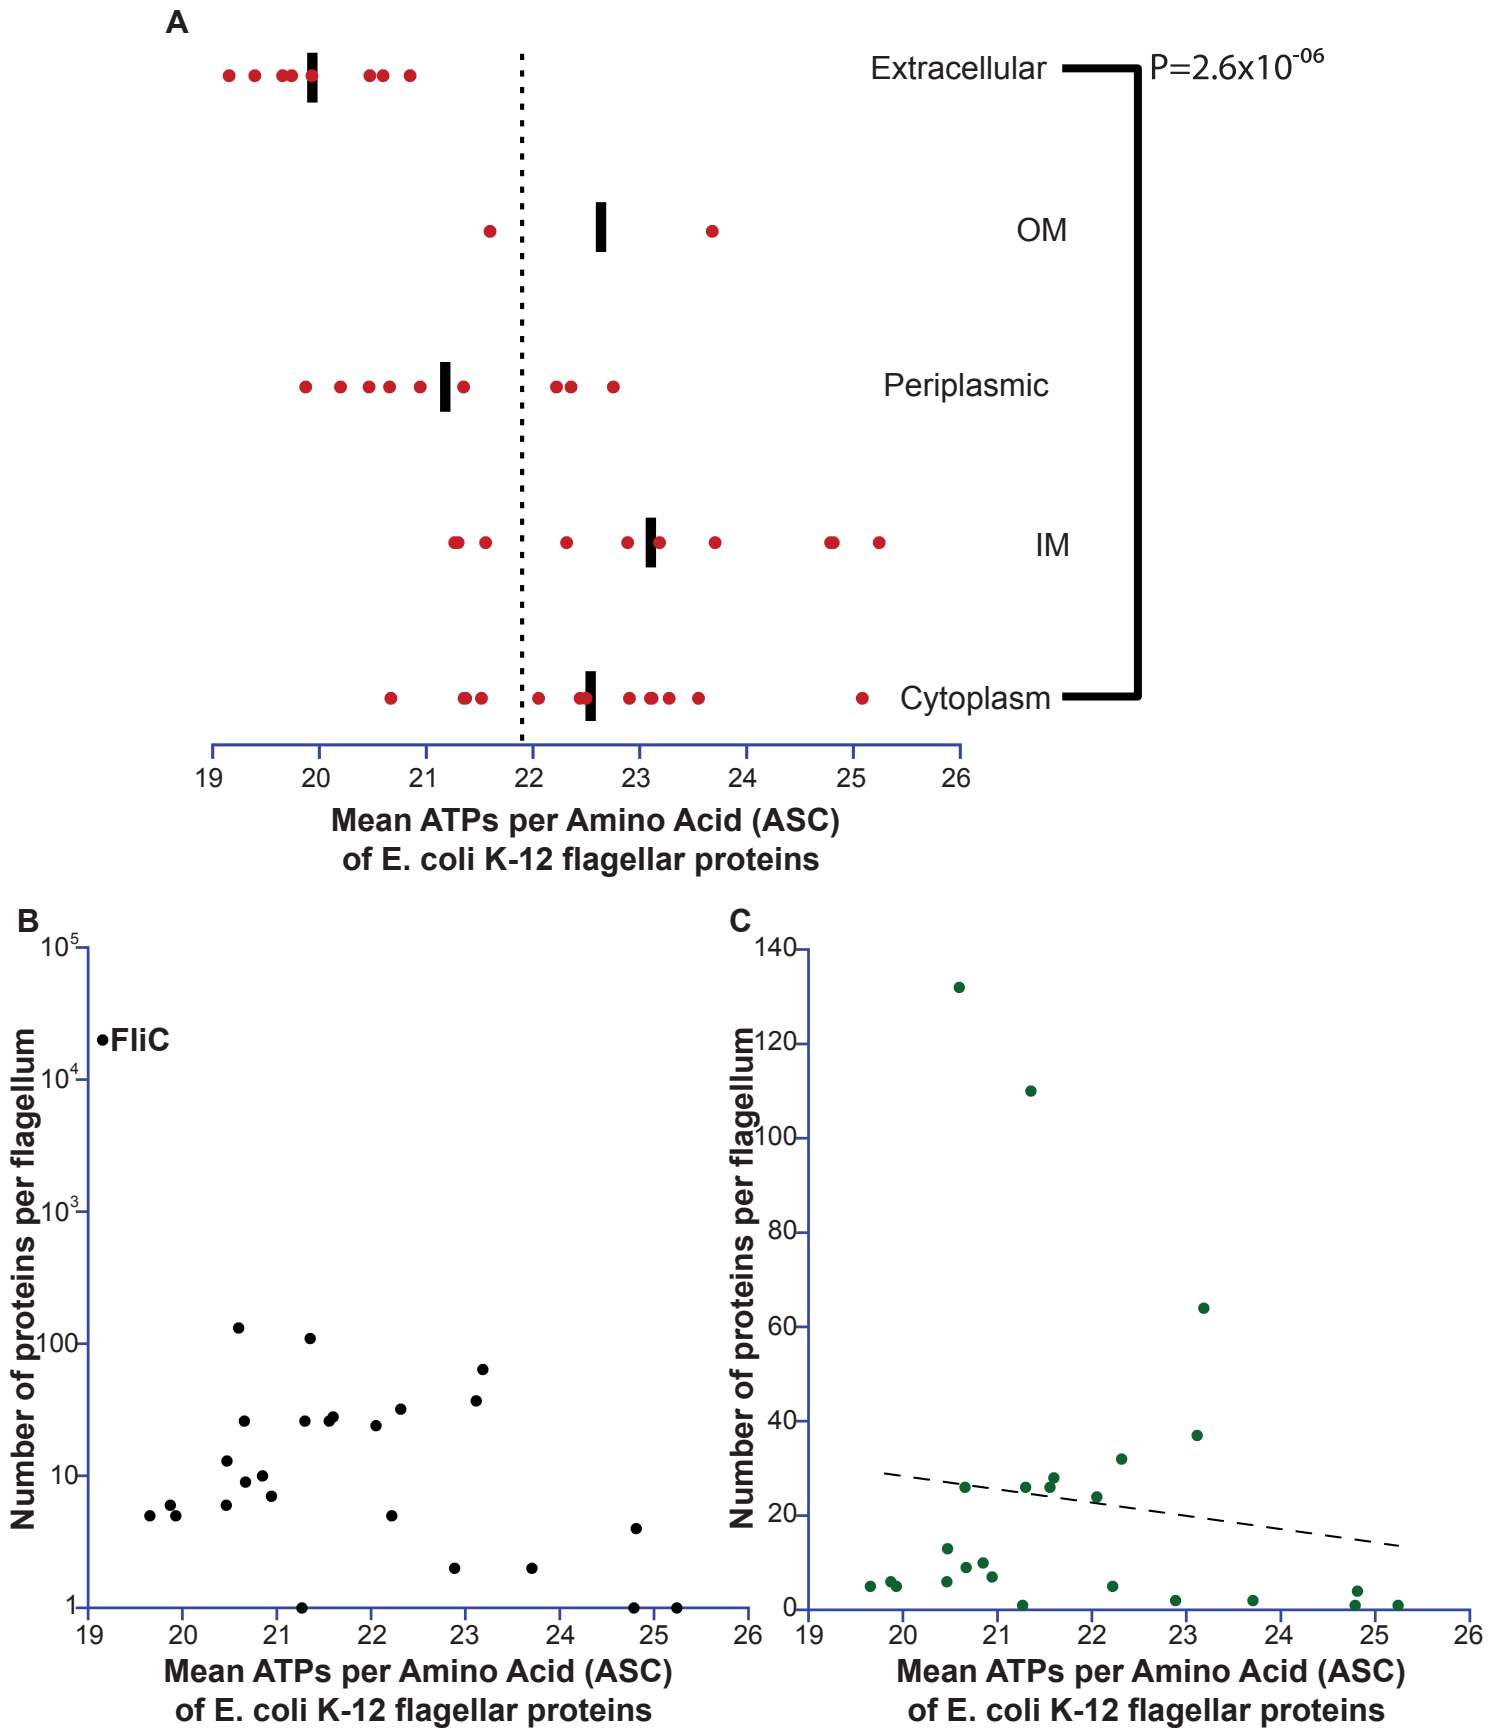

Supplement: mBio00131-10-sf03.pdf [file mBio00131-10-sf03.pdf]

Fig S4

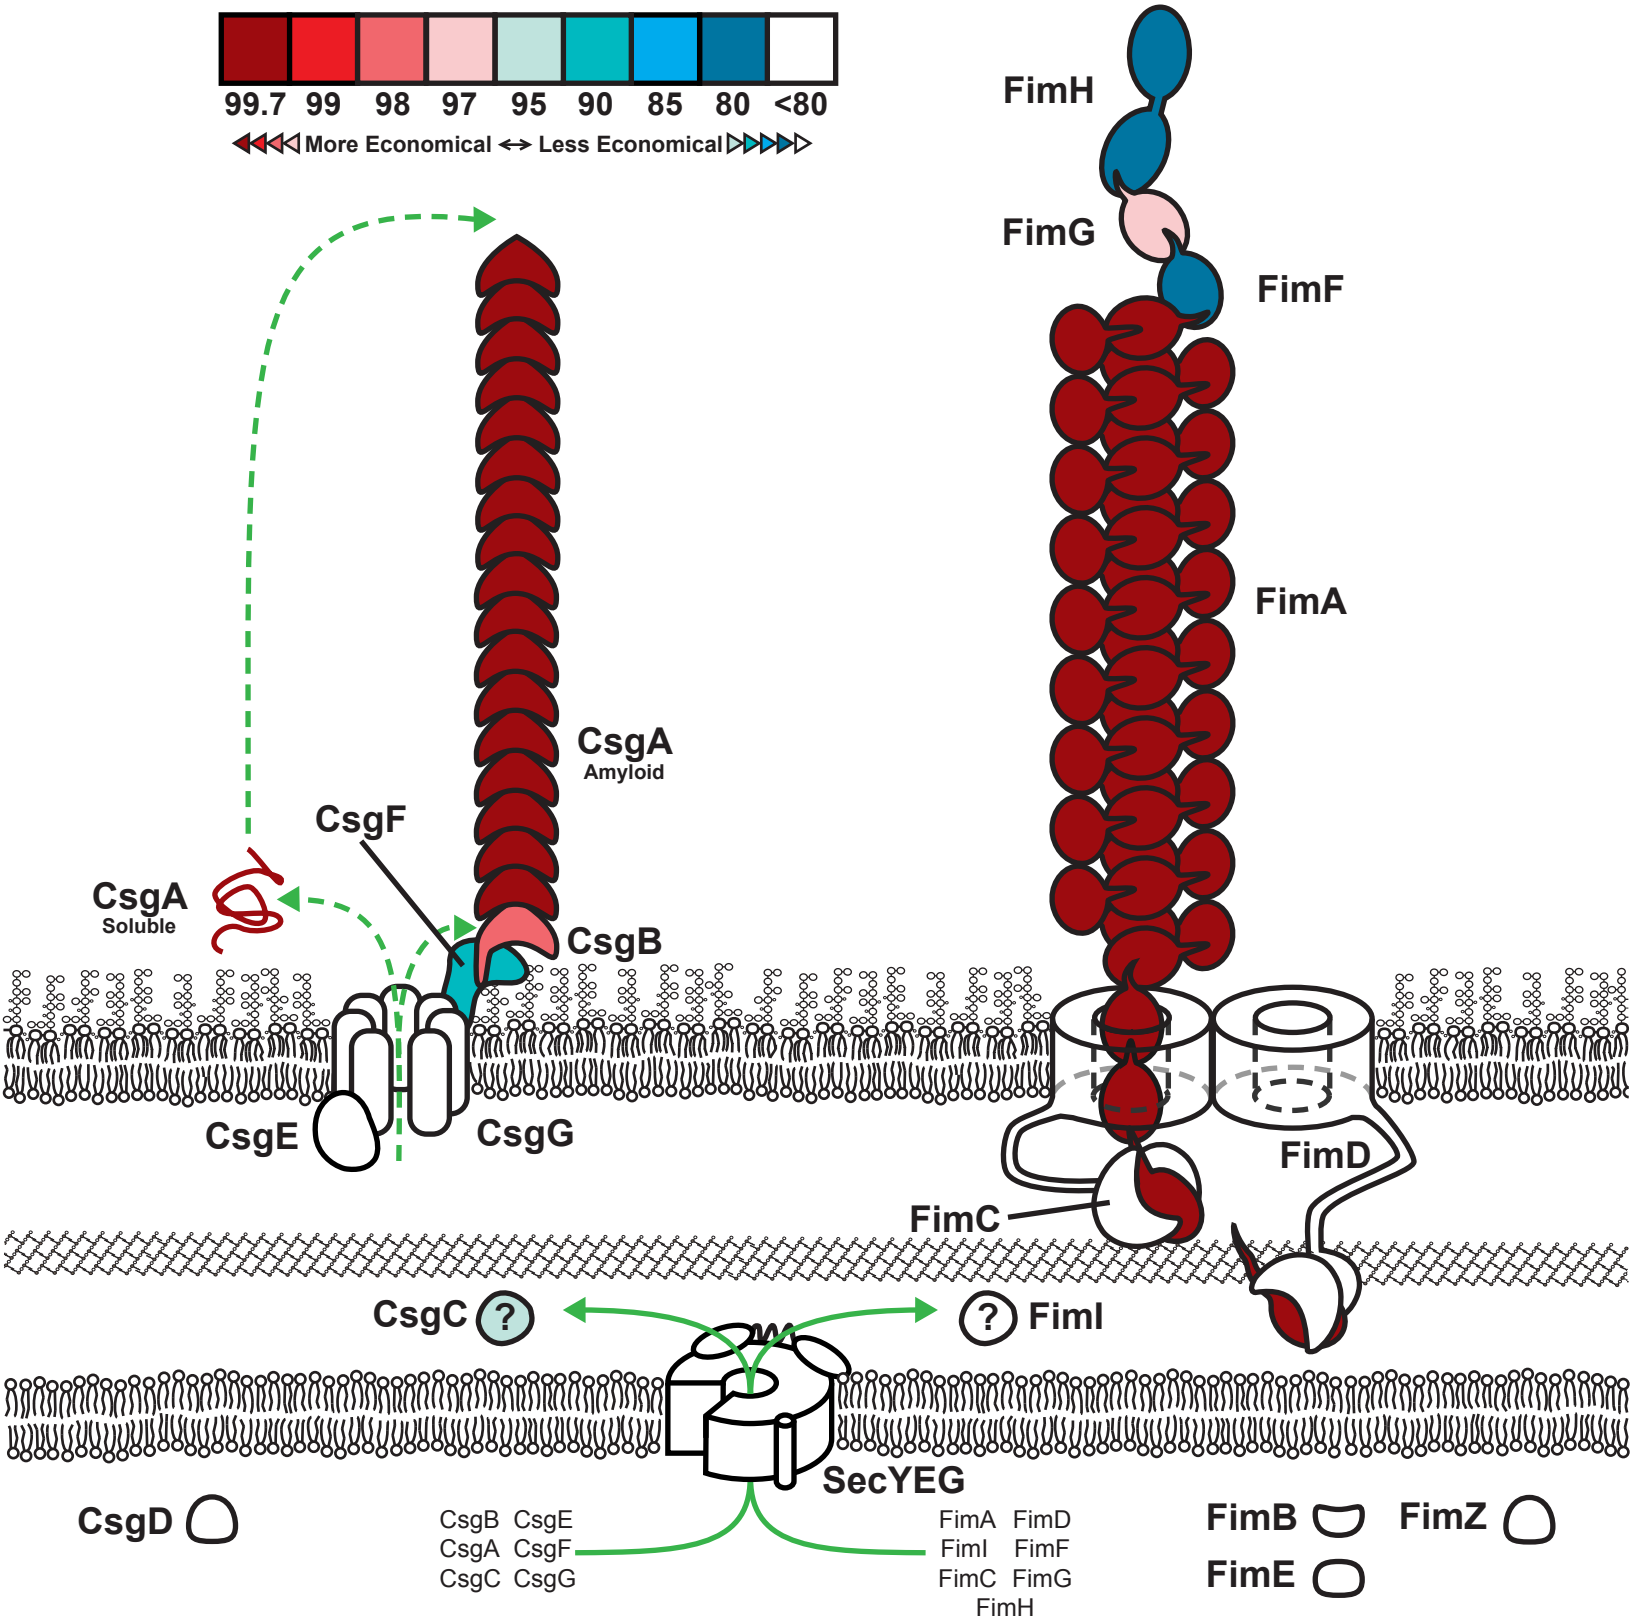

Supplement: mBio00131-10-sf04.pdf [file mBio00131-10-sf04.pdf]

**Fig S5**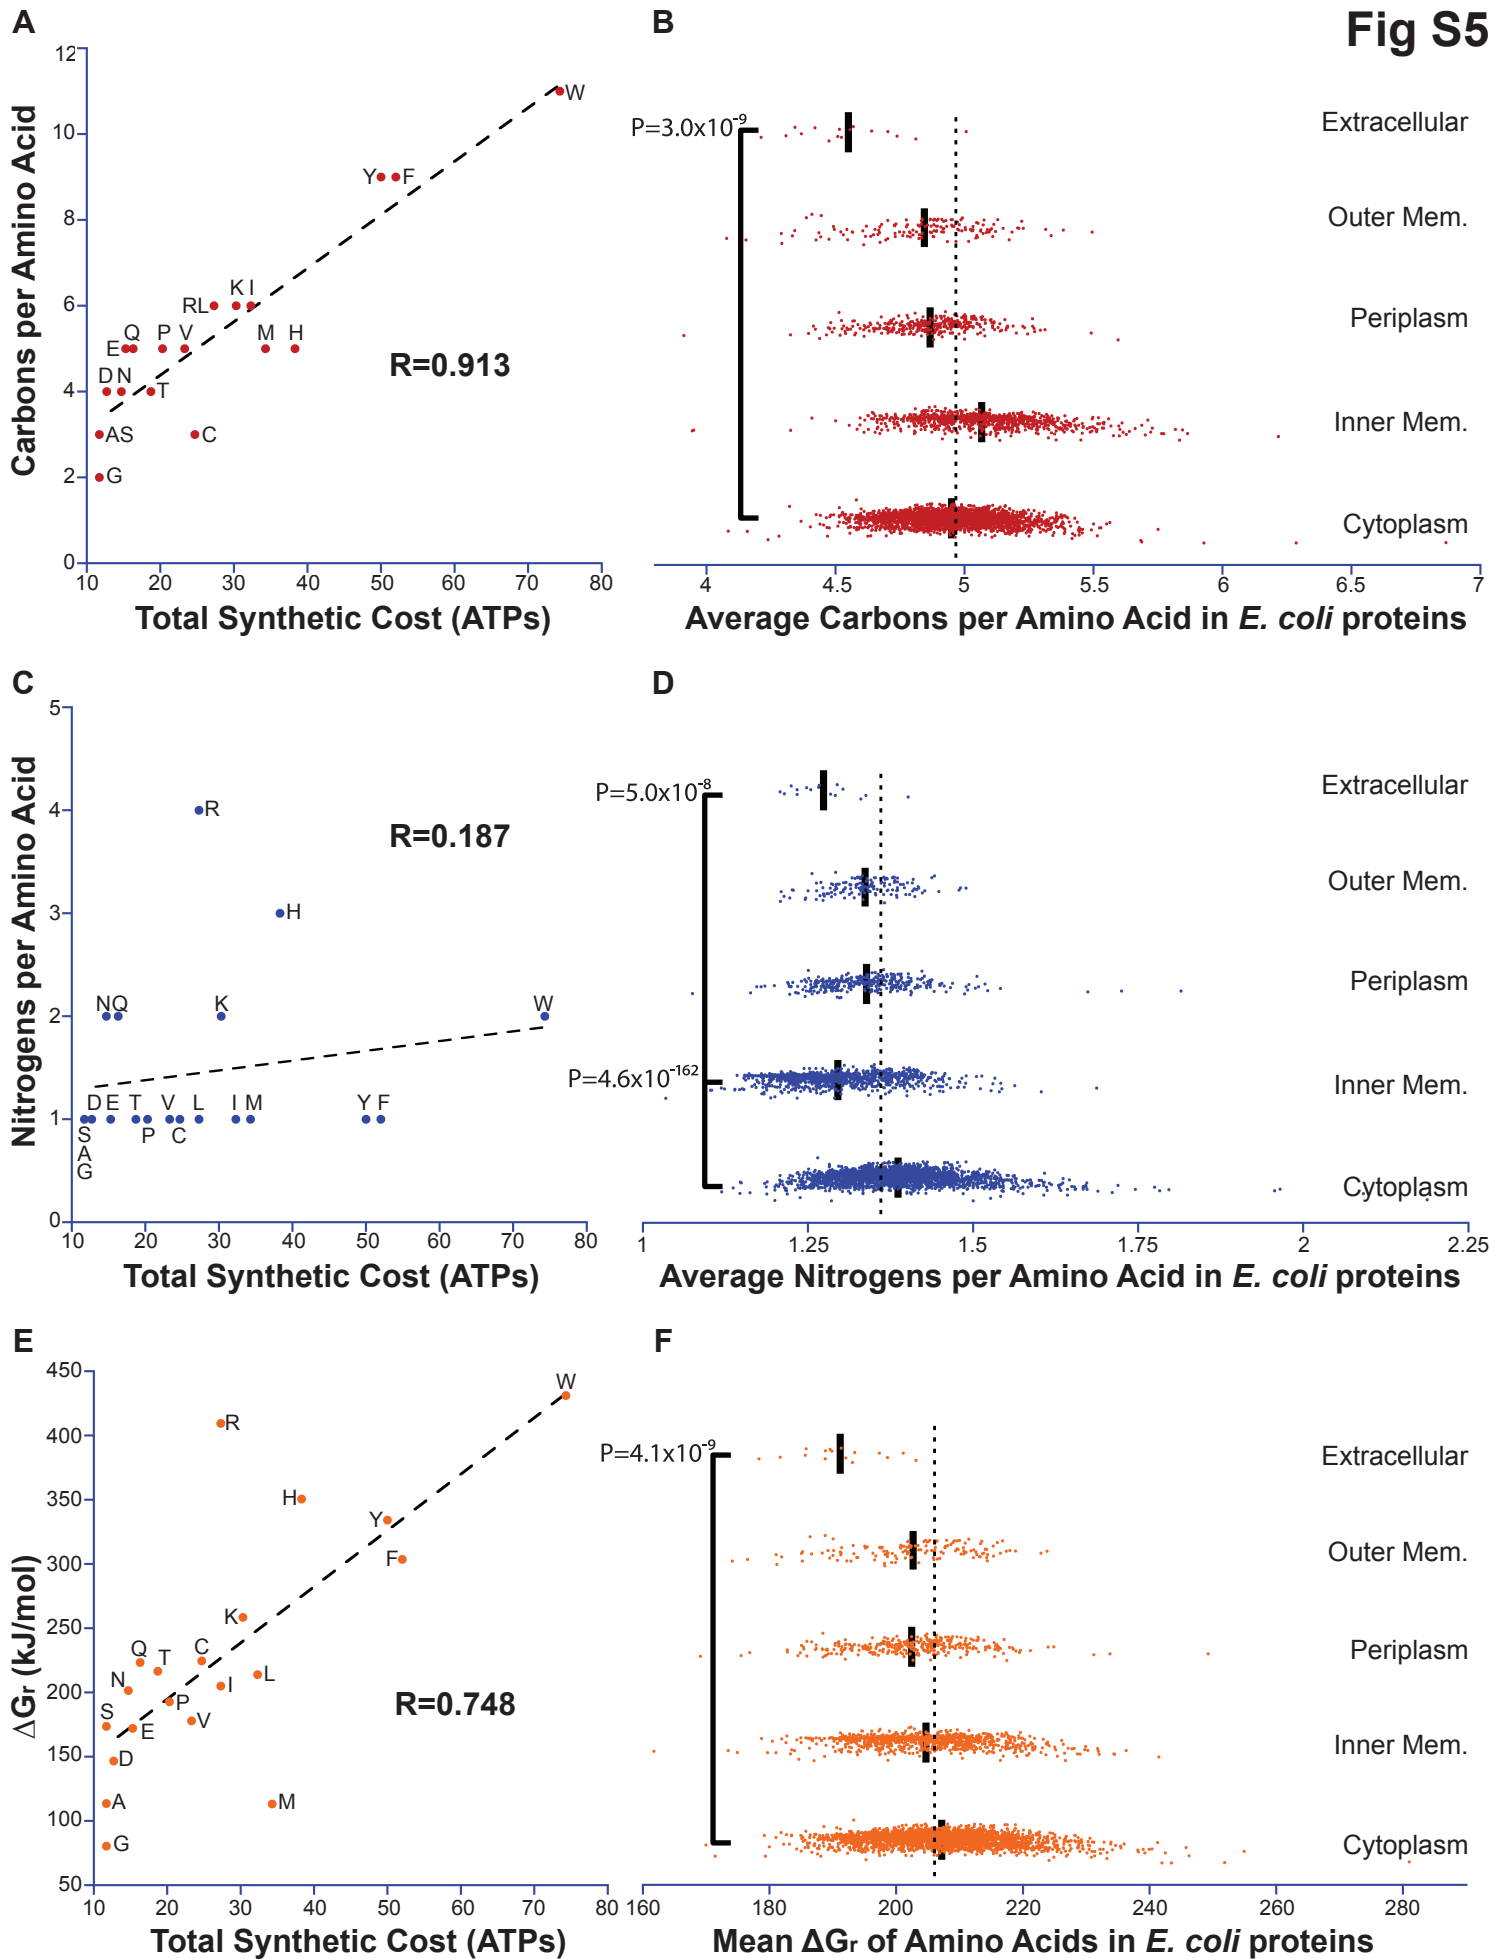

Supplement: mBio00131-10-sf05.pdf [file mBio00131-10-sf05.pdf]

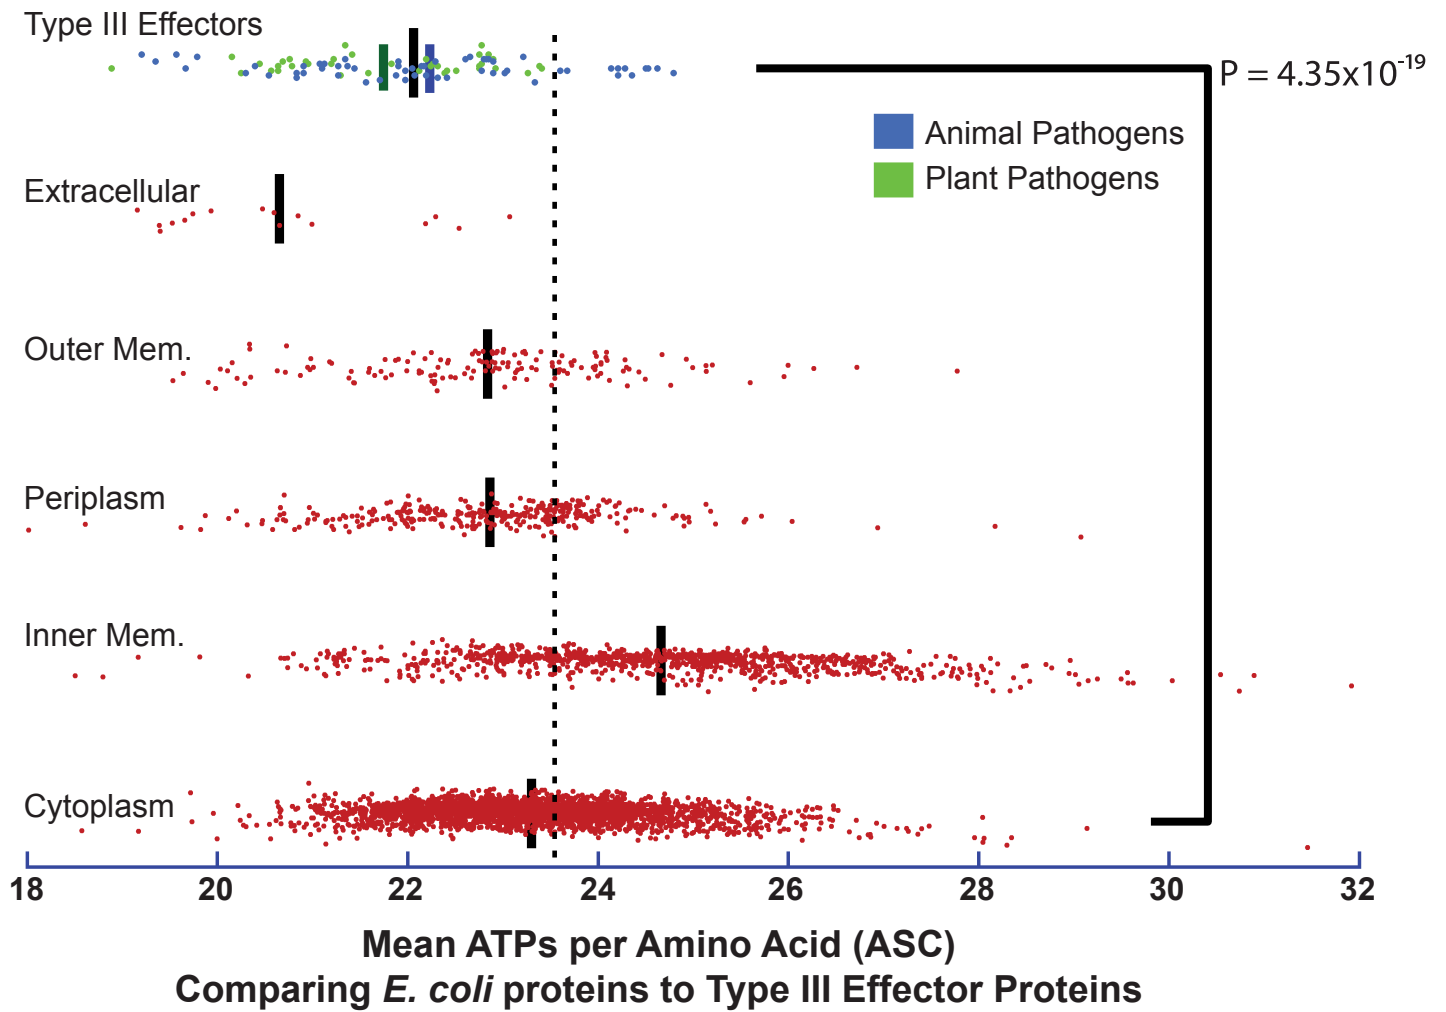

Supplement: mBio00131-10-sf06.pdf [file mBio00131-10-sf06.pdf]

Fig S7

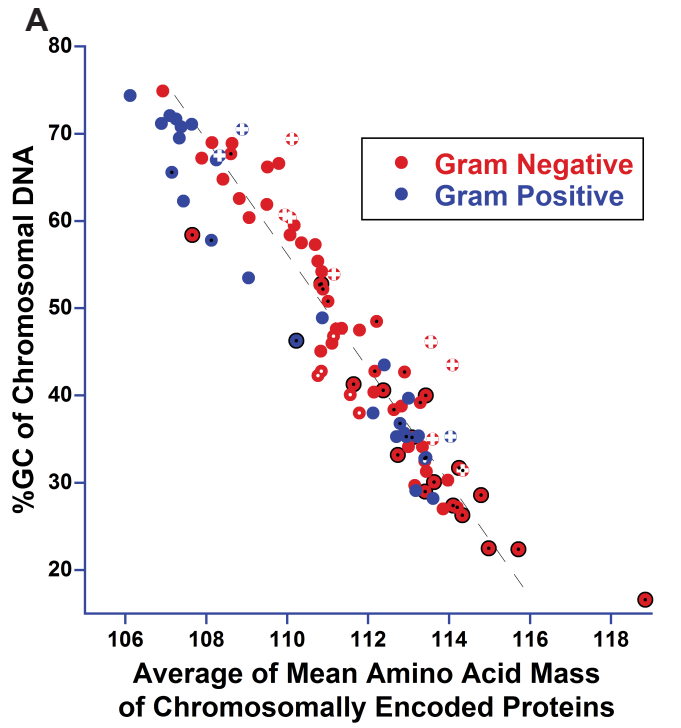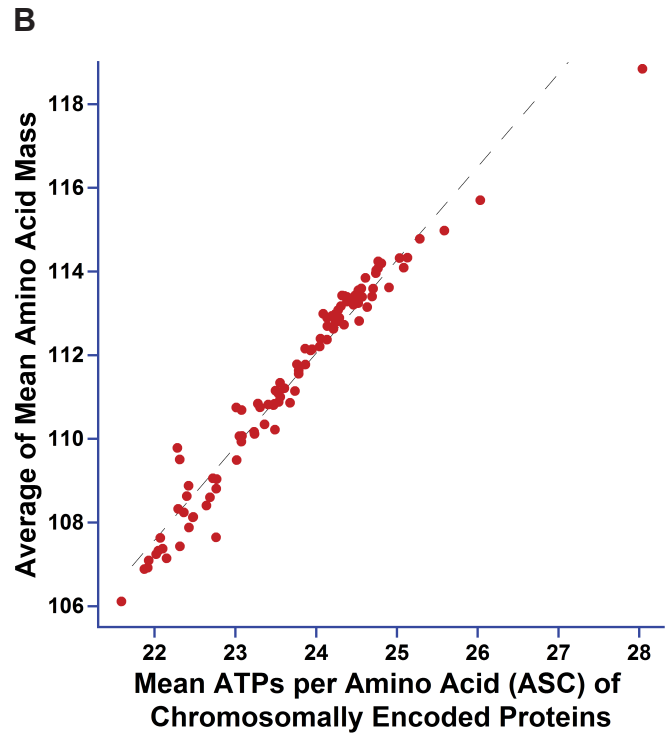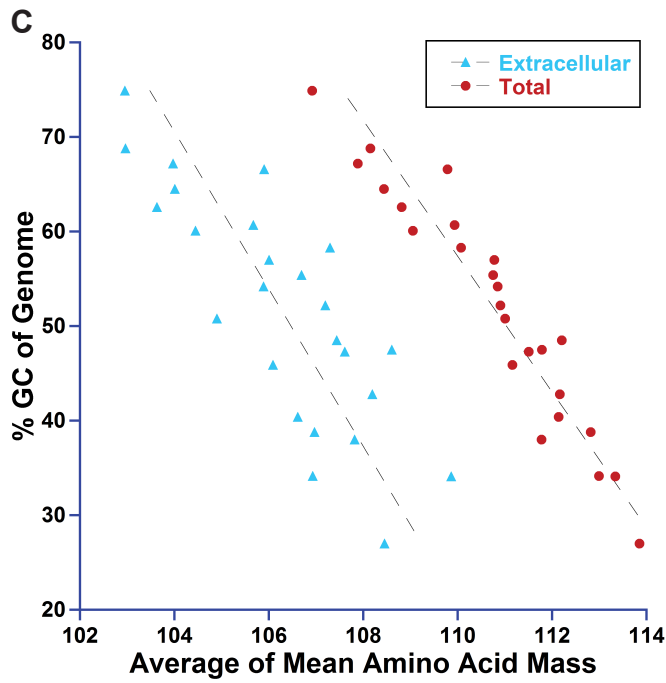

Supplement: mBio00131-10-sf07.pdf [file mBio00131-10-sf07.pdf]
